# Supplementary material for: The role of the systemic inflammatory response in predicting outcomes in patients with operable cancer: Systematic review and meta-analysis
Source: PubMed Central journal article supplement (PMC5711862; doi:10.1038/s41598-017-16955-5), 2017-12-01
Supplement: 41598_2017_16955_MOESM1_ESM.pdf [file 41598_2017_16955_MOESM1_ESM.pdf]

**The role of the systemic inflammatory response in predicting outcomes in patients with operable cancer: Systematic review and meta-analysis**

Ross D Dolan, Jason Lim, Stephen T McSorley, Paul G Horgan, Donald C McMillan

Academic Unit of Surgery, School of Medicine, University of Glasgow, Glasgow Royal Infirmary, Glasgow, UK

**Corresponding author:**

Ross Dolan, Clinical Research Fellow,

Academic Unit of Surgery, University of Glasgow,

New Lister Building, Glasgow Royal Infirmary,

Glasgow,

G4 0SF,

United Kingdom.

**Email:** Ross.Dolan@glasgow.ac.uk

**Tel:** 0141 211 4000

**Fax:** 0141 211 4943

**Keywords:** Systemic inflammation, Operable cancer, Glasgow Prognostic Score, Neutrophil Lymphocyte Ratio, Platelet Lymphocyte Ratio, Lymphocyte Monocyte Ratio, Cancer Specific Survival, Overall Survival.

## Supplementary Tables:

Table 1: Studies investigating the prognostic value of GPS/mGPS in an unselected cohort of patients with operable cancer (Abbreviations: POSSUM (physiological and operative Severity Score for the enumeration of Mortality and Morbidity), pLNR (positive lymph node ratio), TNM (tumour, node, metastasis), ACE-27 (adult co-morbidity evaluation), CLIP (cancer of liver Italian program), CD68 (cluster of differentiation), UISS (UCLA integrated staging system), SSIGN (stage, size, grade and necrosis), LN (lymph node), HS-mGPS (high sensitivity mGPS), BCLC (Barcelona clinic liver cancer), AJCC (American joint committee on cancer), F-NLR (Fibrinogen and NLR), LVI (lymphatic/venous invasion), IBS (Inflammatory based score), CONUT (controlling nutritional status))

| No: GPS/mGPS | Study                                 | Type of Study | Cancer                              | Country        | Patients (n) | Measure of SIR   | Additional Treatment                                                                                             | Cancer deaths (n) | Overall deaths (n) | Cancer survival (HR, 95%CI)                                                                                                  | Overall survival (HR, 95%CI)                           | Independent Prognostic Factors                       |
|--------------|---------------------------------------|---------------|-------------------------------------|----------------|--------------|------------------|------------------------------------------------------------------------------------------------------------------|-------------------|--------------------|------------------------------------------------------------------------------------------------------------------------------|--------------------------------------------------------|------------------------------------------------------|
| 1.           | Ishizuka et al <sup>50</sup><br>2007  | Retrospective | Colorectal                          | Japan          | 315          | GPS (0/1/2)      | No neoadjuvant treatments given                                                                                  | 66                | 144                | N/A                                                                                                                          | Multivariate:<br>OR: 0.165 (0.037-0.732)<br>p=0.0177   | Multivariate:<br>Nil else                            |
| 2.           | McMillan et al <sup>8</sup><br>2007   | Retrospective | Colorectal                          | United Kingdom | 316          | mGPS (0/1/2)     | Adjuvant therapy not specified                                                                                   | 70                | 117                | Univariate:<br>Colon: p<0.0001<br><br>Rectal: p<0.0001<br><br>Multivariate:<br>Dukes stage B<br>1.74 (1.20-2.51)<br>p=0.0032 | Univariate:<br>Colon: p<0.0001<br><br>Rectal: p<0.0001 | Multivariate:<br>Age                                 |
| 3.           | Leitch et al <sup>51</sup><br>2007    | Retrospective | Colorectal                          | United Kingdom | 149          | mGPS (0/1/2)     | 43 patients in the GPS 0, 24 patients in the GPS1 and 4 patients in the GPS 4 group underwent adjuvant treatment | 20                | 45                 | Multivariate:<br>2.21 (1.11-4.41)<br>p=0.024                                                                                 | Multivariate:<br>2.08 (1.32-3.28)<br>p=0.002           | Multivariate:<br>Age, TNM stage, monocyte count      |
| 4.           | Kobayashi et al <sup>52</sup><br>2008 | Retrospective | Oesophageal squamous cell carcinoma | Japan          | 48           | GPS (0/ 1 and 2) | Neoadjuvant chemoradiotherapy (nCRT)                                                                             | N/A               | 34                 | N/A                                                                                                                          | Multivariate:<br>OR: 0.17 (0.06-0.52)<br>p=0.019       | Multivariate:<br>Nil else                            |
| 5.           | Roxburgh et al <sup>53</sup><br>2009  | Retrospective | Colorectal                          | United Kingdom | 287          | mGPS (0/1/2)     | Adjuvant therapy not specified                                                                                   | 67                | 116                | Multivariate:<br>2.65 (1.66-4.25)<br>p<0.001                                                                                 | N/A                                                    | Multivariate:<br>Age, Dukes stage, Klintrup criteria |

|     |                                                     |               |                                    |                |     |                  |                                                     |     |                      |                                                                                                       |                                                |                                                                                               |
|-----|-----------------------------------------------------|---------------|------------------------------------|----------------|-----|------------------|-----------------------------------------------------|-----|----------------------|-------------------------------------------------------------------------------------------------------|------------------------------------------------|-----------------------------------------------------------------------------------------------|
| 6.  | Ishizuka et al <sup>54</sup><br>2009                | Retrospective | Colorectal Liver Metastases        | Japan          | 93  | GPS (0/1/2)      | No patients had neoadjuvant chemotherapy            | 48  | 51                   | Univariate:<br>OR: 1.273 (0.269-6.030)<br>p=0.7612                                                    | N/A                                            | Multivariate:<br>Number of tumours, number of hepatectomies, synchronous lung metastasis, CRP |
| 7.  | Crozier et al <sup>55</sup><br>2009                 | Prospective   | Colon cancer                       | UK             | 188 | mGPS (0/1/2)     | 54 patients received adjuvant therapy               | 47  | 67                   | Multivariate: TNM stage 2 patients (n=95)<br>2.22 (1.04-4.74)<br>p=0.0391                             | N/A                                            | Multivariate:<br>Presentation (elective/emergency)                                            |
| 8.  | Roxburgh et al <sup>56</sup><br>2010                | Retrospective | Colon                              | United Kingdom | 287 | mGPS (0/1/2)     | Adjuvant chemotherapy                               | 80  | 125                  | Multivariate:<br>1.96 (1.19-3.21)<br>p=0.008                                                          | Multivariate:<br>1.73 (1.18-2.25)<br>p=0.005   | Multivariate:<br>Dukes stage, vascular invasion                                               |
| 9.  | Richards et al <sup>57</sup><br>2010                | Prospective   | Colorectal                         | United Kingdom | 320 | mGPS (0/1/2)     | 66 had adjuvant therapy                             | 83  | 136                  | Multivariate:<br>1.78 (1.32-2.41)<br>p<0.001                                                          | Multivariate:<br>1.60 (1.26-2.02) p<0.001      | Multivariate:<br>Age, Smoking, Dukes stage, POSSUM physiology score                           |
| 10. | <u>Hefler-Frischmuth et al<sup>58</sup></u><br>2010 | Prospective   | Vulval                             | Austria        | 93  | GPS (0/1/2)      | No mention of adjuvant treatment                    | 23  | 27                   | N/A                                                                                                   | Multivariate:<br>1.1 (0.5-2.4) p=0.8           | Multivariate:<br>Tumour stage, Positive lymph node                                            |
| 11. | Kobayashi et al <sup>59</sup><br>2010               | Retrospective | Esophageal Squamous Cell Carcinoma | Japan          | 65  | GPS (0 and 1)    | 39 patients received neoadjuvant chemoradiotherapy  | 57  | N/A                  | Multivariate:<br>GPS 0:<br>0.071 (0.011-0.470) p=0.0061<br><br>GPS 1:<br>0.367 (0.046-2.927) p=0.3442 | N/A                                            | Multivariate:<br>Number of lymph node metastases                                              |
| 12. | Kobayashi et al <sup>60</sup><br>2010               | Retrospective | Colorectal Liver Metastases        | Japan          | 63  | GPS (0/ 1 and 2) | 53 patients received chemotherapy after hepatectomy | N/A | 30 (5-year survival) | N/A                                                                                                   | Multivariate:<br>3.07 (1.18-7.98)<br>p= 0.0217 | Multivariate:<br>Liver metastases                                                             |
| 13. | Moug et al <sup>61</sup><br>2011                    | Retrospective | Colorectal                         | United Kingdom | 206 | GPS (0/1/2)      | 9 had neoadjuvant and 48 had adjuvant               | N/A | 63                   | N/A                                                                                                   | Multivariate:<br>1.56 (1.18-2.08) p=0.02       | Multivariate:<br>pLNR                                                                         |
| 14. | Dutta et al <sup>62</sup><br>2011                   | Retrospective | Oesophageal                        | United Kingdom | 112 | GPS (0/1/2)      | 31 had neoadjuvant and 14 adjuvant therapy          | 52  | 59                   | Multivariate:<br>4.31 (2.20-8.45)<br>p<0.001                                                          | N/A                                            | Multivariate:<br>Positive to total lymph node ratio (0/≤0.2/>0.2)                             |

|     |                                      |               |                          |                |     |                                     |                                                                                            |     |     |                                               |                                                                                             |                                                                                                                                               |
|-----|--------------------------------------|---------------|--------------------------|----------------|-----|-------------------------------------|--------------------------------------------------------------------------------------------|-----|-----|-----------------------------------------------|---------------------------------------------------------------------------------------------|-----------------------------------------------------------------------------------------------------------------------------------------------|
| 15. | Dutta et al <sup>63</sup><br>2011    | Retrospective | Oesophagegastric         | United Kingdom | 121 | GPS (0/1/2)                         | 67 patients have had neoadjuvant and 19 adjuvant therapy                                   | 39  | 44  | Multivariate:<br>1.96 (1.09–3.54)<br>p= 0.025 | N/A                                                                                         | Multivariate:<br>TNM stage                                                                                                                    |
| 16. | Crumley et al <sup>64</sup><br>2011  | Retrospective | Gastroesophageal         | United Kingdom | 100 | GPS (0/1/2)                         | Adjuvant and neoadjuvant therapy administered chemo and radiotherapy but numbers not given | 51  | 55  | Multivariate:<br>3.99 (1.96-8.11)<br>p<0.001  | N/A                                                                                         | Multivariate:<br>Number of positive LN,<br>Tumour differentiation,<br>Klintrup score, Ki-67                                                   |
| 17. | Jamieson et al <sup>65</sup><br>2011 | Prospective   | Pancreatic Ductal Cancer | United Kingdom | 135 | GPS (0/1/2)                         | 74 patients had adjuvant therapy                                                           | 107 | 109 | N/A                                           | Multivariate:<br>2.26 (1.43-3.57)<br>p=0.0001                                               | Multivariate:<br>Tumour stage,<br>tumour grade,<br>margin involved,<br>venous invasion,<br>preoperative biliary drainage,<br>adjuvant therapy |
| 18. | Roxburgh et al <sup>66</sup><br>2011 | Retrospective | Colorectal               | United Kingdom | 302 | GPS (0/1/2)                         | 71 patients had adjuvant therapy                                                           | 85  | 135 | Multivariate:<br>1.81 (1.32-2.48)<br>p<0.001  | Multivariate:<br>1.60 (1.25-2.05) p<0.001                                                   | Multivariate:<br>Age, TNM,<br>Peterson Index,<br>Postoperative infective complications,<br>ACE-27                                             |
| 19. | Vashist et al <sup>67</sup><br>2011  | Retrospective | Oesophageal              | Germany        | 495 | GPS (0/1/2)                         | No adjuvant or neoadjuvant therapy                                                         | N/A | 71  | N/A                                           | Multivariate:<br>GPS 1: 1.7 (1.3–2.2)<br>p<0.001<br><br>GPS 2: 2.5 (1.7-3.6)<br>p<0.001     | Multivariate:<br>Tumour size,<br>Node status,<br>Mets, Cell type                                                                              |
| 20. | Nozoe et al <sup>68</sup><br>2011    | Prospective   | Gastric                  | Japan          | 232 | GPS (0/1/2)<br><br>mGPS (0/1/2)     | No mention of adjuvant treatment                                                           | N/A | 184 | N/A                                           | Multivariate:<br>GPS: 3.425 (1.211–9.709) p=0.020<br><br>mGPS: 4.184 (1.792-9.804) p=0.0009 | Multivariate:<br>Tumour stage                                                                                                                 |
| 21. | Ishizuka et al <sup>43</sup><br>2011 | Retrospective | HCC                      | Japan          | 300 | hGPS (0, 1/2)<br><br>*CRP>0.3 mg/dl | No mention of adjuvant treatment                                                           | 91  | 106 | N/A                                           | Univariate:<br>OR: 2.107 (1.061-4.185)<br>p=0.033                                           | Univariate:<br>CLIP score (0,1/≥2)                                                                                                            |

|     |                                       |               |                    |                |      |                 |                                                                         |     |     |                                                                                        |                                                                                        |                                                                                       |
|-----|---------------------------------------|---------------|--------------------|----------------|------|-----------------|-------------------------------------------------------------------------|-----|-----|----------------------------------------------------------------------------------------|----------------------------------------------------------------------------------------|---------------------------------------------------------------------------------------|
| 22. | Roxburgh et al <sup>69</sup><br>2011  | Retrospective | Colon Cancer       | UK             | 76   | mGPS (0/1 or 2) | All patients received adjuvant chemotherapy                             | 30  | 33  | Multivariate:<br>3.24 (1.45-7.27)<br>p=0.004                                           | Multivariate:<br>3.23 (1.49-7.01)<br>p=0.003                                           | Multivariate:<br>Petersen index, T category                                           |
| 23. | Dutta et al <sup>70</sup><br>2012     | Retrospective | Oesophageal Cancer | United Kingdom | 98   | GPS (0/1/2)     | 47 underwent neoadjuvant therapy and 18 adjuvant                        | 60  | 68  | Multivariate:<br>2.91 (1.51-5.62)<br>p=0.001                                           | N/A                                                                                    | Multivariate:<br>Age, Positive to total lymph node ratio, CD68 tertiles               |
| 24. | Ishizuka et al <sup>71</sup><br>2012  | Retrospective | HCC                | Japan          | 398  | GPS (0, 1/2)    | No mention of neoadjuvant or adjuvant therapy                           | 112 | 130 | N/A                                                                                    | Multivariate:<br>OR: 2.5 (1.124-5.561)<br>p=0.025                                      | Multivariate:<br>CLIP score (0, 1/ ≥2)                                                |
| 25. | Richards <sup>72</sup><br>2012        | Retrospective | Colorectal Cancer  | United Kingdom | 343  | GPS (0/1/2)     | No mention of adjuvant treatment                                        | 85  | N/A | Multivariate:<br>1.74 (1.27-2.39)<br>p=0.001                                           | N/A                                                                                    | Multivariate:<br>GPS, Local Inflammatory Cell Infiltrate, TNM, Paterson Index         |
| 26. | Qayyum et al <sup>73</sup><br>2012    | Prospective   | Renal Cell         | United Kingdom | 79   | GPS (0/1/2)     | No mention of adjuvant therapies                                        | 19  | N/A | Multivariate:<br>8.64 (3.5-21.29)<br>p<0.001                                           | N/A                                                                                    | Multivariate:<br>Nil else                                                             |
| 27. | Suigimoto et al <sup>74</sup><br>2012 | Retrospective | Colorectal         | Japan          | 366  | GPS (0/1/2)     | Adjuvant chemotherapy administered                                      | 67  | N/A | Multivariate:<br>3.09 (1.65-5.79)<br>p=0.0004                                          | N/A                                                                                    | Multivariate:<br>Invasion Depth, Lymphatic Invasion, Lymph node metastasis            |
| 28. | Kubota et al <sup>75</sup><br>2012    | Retrospective | Gastric            | Japan          | 1017 | GPS (0/1/2)     | No mention of adjuvant treatment                                        | 66  | 92  | Multivariate:<br>GPS 1: 1.26 (0.54-2.56) p=0.5702<br>GPS 2: 5.07 (1.94-11.41) p=0.0018 | Multivariate:<br>GPS 1: 1.82 (1.00-3.11) p=0.0499<br>GPS 2: 5.23 (2.30-10.37) p=0.0003 | Multivariate :<br>Age ≥75, Upper zone tumour, Lymph node mets, Surgical complications |
| 29. | Powell et al <sup>76</sup><br>2012    | Prospective   | Colorectal         | United Kingdom | 411  | mGPS (0/1/2)    | Adjuvant therapy offered but no specific information on numbers given   | 114 | 191 | Multivariate:<br>1.36 (1.03-1.79)<br>p=0.028                                           | N/A                                                                                    | Multivariate:<br>Age, Lymph Node Ratio, Peterson Index, Klintrup score                |
| 30. | La Torre et al <sup>77</sup><br>2012  | Retrospective | Pancreatic         | Italy          | 101  | GPS (0/1/2)     | 26 underwent adjuvant treatment including chemotherapy and radiotherapy | N/A | 84  | N/A                                                                                    | Multivariate:<br>1.7745 (1.1869-2.6532)<br>p=0.005428                                  | Multivariate:<br>LNR, Node status, Margin status                                      |

|     |                                      |               |                                  |                |      |              |                                                                                    |     |     |                                                     |                                                     |                                                                                                                         |
|-----|--------------------------------------|---------------|----------------------------------|----------------|------|--------------|------------------------------------------------------------------------------------|-----|-----|-----------------------------------------------------|-----------------------------------------------------|-------------------------------------------------------------------------------------------------------------------------|
| 31. | Dutta et al <sup>78</sup><br>2012    | Retrospective | Gastric                          | United Kingdom | 120  | GPS (0/1/2)  | Patients received both adjuvant and neoadjuvant therapy specific figures not given | 44  | 51  | Multivariate:<br>2.23 (1.40-3.54)<br>p=0.001        | N/A                                                 | Multivariate:<br>Elevated lymph node ratio                                                                              |
| 32. | Wang et al <sup>79</sup><br>2012     | Retrospective | Gastric                          | China          | 324  | GPS (0/1/2)  | 210 patients had adjuvant chemotherapy                                             | N/A | 162 | N/A                                                 | Multivariate:<br>1.397 (1.070-1.824)<br>p=0.014     | Multivariate:<br>The 7 <sup>th</sup> TNM stage, Adjuvant chemotherapy                                                   |
| 33. | Lamb et al <sup>80</sup><br>2012     | Retrospective | Renal                            | United Kingdom | 169  | GPS (0/1/2)  | No mention of adjuvant therapies                                                   | 35  | 59  | Multivariate:<br>6.65 (3.71 – 11.93) p<0.001        | Multivariate:<br>4.17 (2.48 – 7.03)<br>p<0.001      | Multivariate:<br>Fuhmann grade, Necrosis, UISS, Leibovich, SSIGN,                                                       |
| 34. | Ishizuka et al <sup>81</sup><br>2012 | Retrospective | Colorectal                       | Japan          | 271  | GPS (0/1/2)  | Adjuvant chemotherapy in 76 cases                                                  | 42  | 59  | Univariate:<br>OR: 1.986 (1.028-3.840)<br>p=0.041   | Multivariate:<br>OR: 2.023 (1.046-3.915)<br>p=0.036 | Multivariate:<br>Platelet Count                                                                                         |
| 35. | Jiang et al <sup>82</sup><br>2012    | Retrospective | Gastric                          | Japan          | 1710 | mGPS (0/1/2) | No mention of adjuvant treatment                                                   | N/A | 562 | N/A                                                 | Multivariate:<br>OR: 1.845 (1.184-2.875)<br>p=0.007 | Multivariate:<br>Age, Tumour stage                                                                                      |
| 36. | Jamieson et al <sup>83</sup><br>2012 | Retrospective | Pancreatic Ductal Adenocarcinoma | UK             | 173  | mGPS (0/1/2) | 67 patients received adjuvant chemotherapy                                         | N/A | 173 | N/A                                                 | Multivariate:<br>1.77 (1.19-2.62)<br>p=0.005        | Multivariate:<br>Tumour stage, resection margin status, venous invasion, inflammatory cell infiltrate, adjuvant therapy |
| 37. | Stoz et al <sup>84</sup><br>2013     | Retrospective | Pancreatic Cancer                | Austria        | 110  | GPS (0/1/2)  | 88 Underwent chemotherapy                                                          | N/A | 110 | N/A                                                 | Univariate:<br>1.095 (0.791-1.574)<br>p=0.585       | Multivariate:<br>Stage at diagnosis, NLR                                                                                |
| 38. | Guthrie et al <sup>47</sup><br>2013  | Retrospective | Colorectal                       | United Kingdom | 206  | mGPS (0/1/2) | 58 patients had adjuvant chemotherapy                                              | 29  | 41  | Multivariate:<br>Pre-Op: 1.97 (1.16–3.34)<br>P<0.05 | N/A                                                 | Multivariate:<br>Pre-Op NLR                                                                                             |
| 39. | Shiba et al <sup>85</sup><br>2013    | Retrospective | Carcinoma of the ampulla         | Japan          | 30   | GPS (0/1/2)  | No specific mention of adjuvant therapy                                            | N/A | 25  | N/A                                                 | Multivariate:<br>11.364 (1.017-126.9)<br>p=0.048    | Multivariate:<br>Lymph node metastasis                                                                                  |

|     |                                      |               |                     |                |     |                  |                                                 |     |                    |                                                  |                                                     |                                                                          |
|-----|--------------------------------------|---------------|---------------------|----------------|-----|------------------|-------------------------------------------------|-----|--------------------|--------------------------------------------------|-----------------------------------------------------|--------------------------------------------------------------------------|
|     |                                      |               | of vater            |                |     |                  |                                                 |     |                    |                                                  |                                                     |                                                                          |
| 40. | Oshiro et al <sup>86</sup><br>2013   | Retrospective | Cholangiocarcinoma  | Japan          | 62  | GPS (0/1/2)      | No mention of adjuvant treatment                | N/A | 46                 | N/A                                              | Multivariate:<br>2.787 (1.153-6.735)<br>p=0.022     | Multivariate:<br>Nil Else                                                |
| 41. | Horino et al <sup>87</sup><br>2013   | Retrospective | HCC                 | Japan          | 352 | GPS (0/1/2)      | No mention of adjuvant treatment                | N/A | 128                | N/A                                              | Multivariate:<br>3.796 (2.050-7.031)<br>p<0.001     | Multivariate:<br>Tumour size,<br>Operation time,<br>Vp                   |
| 42. | Ishizuka et al <sup>88</sup><br>2013 | Retrospective | Colorectal Stage IV | Japan          | 108 | GPS 2 vs. 0,1    | Majority had adjuvant chemotherapy              | 72  | 79                 | N/A                                              | Multivariate:<br>OR: 0.451 (0.271-0.753)<br>p=0.002 | Multivariate:<br>Pathology others,<br>Subclass of stage IV               |
| 43. | Ishizuka et al <sup>14</sup><br>2013 | Retrospective | Colorectal          | Japan          | 481 | GPS (0/1/2)      | Patients with stage IV disease had chemotherapy | 120 | 150                | Multivariate:<br>OR: 2.604 (1.242-5.456) p=0.011 | N/A                                                 | Multivariate:<br>Pathology, LN<br>Mets, CRP,<br>Albumin, CEA,<br>COP-NLR |
| 44. | Son et al <sup>89</sup><br>2013      | Retrospective | Colon Cancer        | Korea          | 624 | mGPS (2 vs. 0-1) | 503 patients received chemotherapy              | N/A | 55 (5 yr survival) | N/A                                              | Multivariate:<br>2.217 (0.716-6.864)<br>p=0.167     | Multivariate:<br>Fibrinogen, stage,<br>CEA                               |
| 45. | Nozoe et al <sup>90</sup><br>2014    | Retrospective | Colorectal          | Japan          | 272 | GPS (0/1/2)      | No mention of adjuvant treatment                | N/A | 49                 | N/A                                              | Multivariate:<br>OR: 7.41 (3.66-15.2)<br>p<0.0001   | Multivariate:<br>Tumour stage,<br>venous invasion                        |
| 46. | Takeno et al <sup>42</sup><br>2014   | Retrospective | Gastric             | Japan          | 552 | mGPS (0/1/2)     | No mention of adjuvant treatment                | N/A | 215                | N/A                                              | Multivariate:<br>1.2391 (0.9188-1.6787)<br>p=0.1598 | Multivariate:<br>HS-mGPS                                                 |
| 47. | Pinato et al <sup>91</sup><br>2014   | Retrospective | Lung                | United Kingdom | 220 | GPS (0/1/2)      | Adjuvant radio and chemotherapy administered    | N/A | 61                 | N/A                                              | Univariate:<br>1.5 (1.0-2.0) p=0.02                 | Multivariate:<br>NLR, Pleural Effusion                                   |
| 48. | Huang et al <sup>92</sup><br>2014    | Prospective   | HCC                 | China          | 349 | GPS (0/1/2)      | No mention of adjuvant treatment                | N/A | 153                | N/A                                              | Multivariate:<br>1.633 (1.226-2.174)<br>p=0.001     | Multivariate:<br>CLIP score, BCLC stage                                  |

|     |                                       |               |                             |                |     |                |                                                                                   |              |                      |                                              |                                                                                                                |                                                                                                                                                      |
|-----|---------------------------------------|---------------|-----------------------------|----------------|-----|----------------|-----------------------------------------------------------------------------------|--------------|----------------------|----------------------------------------------|----------------------------------------------------------------------------------------------------------------|------------------------------------------------------------------------------------------------------------------------------------------------------|
| 49. | Feng et al <sup>93</sup><br>2014      | Retrospective | Oesophageal                 | China          | 493 | GPS (0/1/2)    | Adjuvant chemo and radiotherapy administered                                      | 409 (1 year) | N/A                  | Univariate:<br>1.907 (1.608-2.262) p<0.001   | N/A                                                                                                            | Univariate:<br>Tumour depth, Differentiation, Nodal Mets                                                                                             |
| 50. | Forrest et al <sup>94</sup><br>2014   | Retrospective | Colorectal                  | United Kingdom | 134 | GPS (0/1/2)    | No mention of Adjuvant treatment                                                  | 43           | 81                   | Univariate:<br>2.12 (1.41-3.20) p<0.001      | N/A                                                                                                            | Univariate:<br>T-stage, N-stage, TNM stage, Venous invasion, Peritoneal involvement, Margin involvement, Manual and Automatic Klintrup-Makinen grade |
| 51. | Wu et al <sup>95</sup><br>2014        | Retrospective | Gallbladder                 | China          | 85  | GPS (0 vs 1/2) | 13 patients had post op chemotherapy                                              | N/A          | 75                   | N/A                                          | Multivariate:<br>10.877 (2.496-47.398) p=0.001                                                                 | Multivariate:<br>Tumour Invasion, Lymph node metastasis, Margin status                                                                               |
| 52. | Hirashima et al <sup>40</sup><br>2014 | Retrospective | Gastric                     | Japan          | 294 | mGPS (0/1/2)   | 9 patients had neoadjuvant chemotherapy                                           | N/A          | 38                   | N/A                                          | Multivariate:<br><75 Years: (n=195)<br>1.24 (0.41-3.75) p=0.70<br>>75 Years: (n=99)<br>2.26 (1.09-4.69) p=0.03 | Multivariate:<br>Age, Total Gastrectomy, Peritoneal mets, Stage                                                                                      |
| 53. | Nakamura et al <sup>38</sup><br>2014  | Retrospective | Oesophageal                 | Japan          | 168 | mGPS (0/1/2)   | 13 had neoadjuvant treatment while 62 had adjuvant treatment                      | N/A          | 44 (3-year survival) | N/A                                          | Multivariate:<br>2.726 (1.021-7.112) p=0.0449                                                                  | Multivariate:<br>N3: Lymph node, Residual Tumour                                                                                                     |
| 54. | Sun et al <sup>96</sup><br>2014       | Retrospective | Colon cancer                | China          | 255 | mGPS (0/1/2)   | No specific mention of neoadjuvant or adjuvant treatment                          | N/A          | 94                   | N/A                                          | Multivariate:<br>RR 2.968 (2.137-4.122) p=0.000                                                                | Multivariate:<br>AFP, CEA, fibrinogen, TNM                                                                                                           |
| 55. | Nakagawa et al <sup>97</sup><br>2014  | Retrospective | Colorectal Liver Metastases | Japan          | 343 | mGPS (0/1/2)   | 69 patients received neoadjuvant chemotherapy, 216 received adjuvant chemotherapy | 86           | 94                   | Multivariate:<br>1.595 (1.156-2.201) p=0.004 | N/A                                                                                                            | Multivariate:<br>CEA (<30/ ≥30 ng/L)                                                                                                                 |
| 56. | Aurello et al <sup>32</sup><br>2014   | Retrospective | Gastric Cancer              | Italy          | 102 | mGPS (0/1/2)   | 68 patients received adjuvant chemotherapy after surgery                          | 62           | 62                   | N/A                                          | Multivariate:<br>mGPS 1:<br>1.70 (1.20-3.42) p=0.005                                                           | Multivariate:<br>Prognostic index                                                                                                                    |



|     |                                            |               |                       |                |      |                     |                                                                 |     |     |                                                                                                   |                                                                                                                                                                           |                                                                                            |
|-----|--------------------------------------------|---------------|-----------------------|----------------|------|---------------------|-----------------------------------------------------------------|-----|-----|---------------------------------------------------------------------------------------------------|---------------------------------------------------------------------------------------------------------------------------------------------------------------------------|--------------------------------------------------------------------------------------------|
|     |                                            |               |                       |                |      |                     |                                                                 |     |     |                                                                                                   | mGPS 2:<br>1.91 (1.38-3.18)<br>p=0.008                                                                                                                                    |                                                                                            |
| 57. | Miyazaki et al <sup>98</sup><br>2015       | Retrospective | NSCLC                 | Japan          | 97   | GPS (0/1/2)         | No mention of adjuvant treatment                                | 29  | 44  | N/A                                                                                               | Multivariate:<br>2.13 (1.036-4.393)<br>p=0.04                                                                                                                             | Multivariate:<br>Patient factors,<br>Inflammatory<br>factors, stage<br>factors             |
| 58. | Matsuda et al <sup>99</sup><br>2015        | Retrospective | Oesophageal<br>Cancer | Japan          | 199  | GPS (0/1/2)         | 99 patients received neoadjuvant chemotherapy/chemoradiotherapy | N/A | 72  | N/A                                                                                               | Multivariate:<br>GPS 1:<br>0.562 (0.229-1.377)<br>p=0.208<br><br>GPS 2:<br>0.969 (0.123-7.668)<br>p=0.976                                                                 | Multivariate:<br>Clinical stage,<br>fibrinogen and<br>albumin score                        |
| 59. | Farhan-Alanie et al <sup>100</sup><br>2015 | Retrospective | Oral SCC              | United Kingdom | 178  | GPS (0/1/2)         | 70 patients had adjuvant therapy                                | 42  | 56  | Multivariate:<br>2.12 (1.49-3.00)<br>p<0.001                                                      | Multivariate:<br>1.69 (1.23-2.31) p=0.001                                                                                                                                 | Multivariate:<br>Male and AJCC<br>stage 4                                                  |
| 60. | Ferro et al <sup>101</sup><br>2015         | Retrospective | Bladder<br>Cancer     | Italy          | 1037 | mGPS (0/1/2)        | 799 received adjuvant chemotherapy                              | 426 | 430 | Multivariate:<br>mGPS 1: 0.87<br>(0.54-1.40)<br>p=0.565<br>mGPS 2: 0.94<br>(0.49-1.81)<br>p=0.853 | Multivariate:<br>mGPS 1: 1.19 (0.84-1.70)<br>p=0.332<br>mGPS 2: 1.25 (0.74-2.11)<br>p=0.410                                                                               | Multivariate:<br><br>Pathologic stage<br>T4, Node positive<br>and adjuvant<br>Chemotherapy |
| 61. | Arigami et al <sup>39</sup><br>2015        | Retrospective | Oesophageal<br>Cancer | Japan          | 238  | mGPS (0/1/2)        | No mention of adjuvant therapy                                  | N/A | 98  | N/A                                                                                               | Multivariate:<br>1.08 (0.49-2.19) p=0.830                                                                                                                                 | Multivariate:<br>F-NLR Score,<br>Lymph node mets,<br>Depth of tumour<br>invasion           |
| 62. | Xu et al <sup>22</sup><br>2015             | Retrospective | Oesophageal<br>SCC    | China          | 468  | GPS/mGPS<br>(0/1/2) | 196 patient received adjuvant chemo and radiotherapy            | N/A | 259 | N/A                                                                                               | Univariate:<br>GPS 1: 1.33 (0.99-1.78)<br>p=0.057<br>GPS 2: 1.83 (1.18-2.86)<br>p=0.008<br><br>mGPS 1: 1.39 (1.01-1.91)<br>p=0.046<br>mGPS 2: 1.82 (1.17-2.83)<br>p=0.008 | Multivariate:<br>Lymph Node<br>Mets,<br>Venous/lymphatic<br>invasion, CRP/Alb<br>Ratio     |

|     |                                       |               |                   |       |      |              |                                                             |     |     |                                              |                                                                                                 |                                                                                                                                                              |
|-----|---------------------------------------|---------------|-------------------|-------|------|--------------|-------------------------------------------------------------|-----|-----|----------------------------------------------|-------------------------------------------------------------------------------------------------|--------------------------------------------------------------------------------------------------------------------------------------------------------------|
| 63. | Ni <sup>102</sup><br>2015             | Retrospective | HCC               | China | 367  | mGPS (0/1/2) | No mention of adjuvant treatment                            | N/A | 40  | N/A                                          | Multivariate:<br>4.356 (2.495-7.605)<br>p<0.001                                                 | Multivariate:<br>GGT≥60,<br>AFP≥400, CLIP<br>Score, Vascular<br>Invasion                                                                                     |
| 64. | Hirahara <sup>103</sup><br>2015       | Retrospective | Oesophageal       | Japan | 141  | GPS (0/1/2)  | No mention of adjuvant treatment                            | N/A | 16  | N/A                                          | Multivariate:<br>2.045 (1.032-3.928)<br>p=0.041                                                 | Multivariate:<br>p Stage                                                                                                                                     |
| 65. | Shibutani <sup>104</sup><br>2015      | Retrospective | Colorectal        | Japan | 254  | GPS (0/1/2)  | Adjuvant chemotherapy                                       | N/A | 69  | N/A                                          | Multivariate:<br>7.238 (1.180-44.415)<br>p=0.032                                                | Multivariate:<br>NLR (Pre & Post<br>op), Number of<br>lymph node mets                                                                                        |
| 66. | Shiba et al <sup>105</sup><br>2015    | Retrospective | Gallbladder Ca    | Japan | 51   | GPS (0/1/2)  | No mention of adjuvant treatment                            | N/A | 16  | N/A                                          | Multivariate:<br>3.782 (1.119-12.786)<br>p=0.032                                                | Multivariate:<br>Lymph node<br>metastasis                                                                                                                    |
| 67. | Kawashima et al <sup>41</sup><br>2015 | Retrospective | Lung Cancer       | Japan | 1043 | GPS (0/1/2)  | No mention of adjuvant treatment                            | N/A | 227 | N/A                                          | Multivariate:<br>GPS 1<br>1.63 (1.09-2.42)<br>p=0.02<br><br>GPS 2<br>1.44 (0.80-2.60)<br>p=0.22 | Multivariate:<br>Age, smoking,<br>preoperative co-<br>morbidities, CEA,<br>pathological<br>stage, histological<br>tumour type, LVI,<br>surgical<br>procedure |
| 68. | Watt et al <sup>106</sup><br>2015     | Retrospective | Colorectal cancer | UK    | 508  | mGPS (0/1/2) | 108 patients had adjuvant chemotherapy following resection. | 172 | 292 | Multivariate:<br>1.54 (1.25-1.90)<br>p<0.001 | Multivariate:<br>1.32 (1.12-1.56)<br>p=0.001                                                    | Multivariate:<br>Age, site, TNM<br>stage, margin<br>involvement,<br>peritoneal<br>involvement, sex,<br>venous invasion,<br>tumour<br>perforation             |
| 69. | Okamura et al <sup>107</sup><br>2015  | Retrospective | HCC               | Japan | 256  | GPS (0/1/2)  | No mention of adjuvant treatment                            | N/A | 86  | N/A                                          | Multivariate:<br>1.71 (0.92-3.16)<br>p=0.089                                                    | Multivariate:<br>AFP, des-gamma-<br>carboxy<br>prothrombin, high<br>NLR, low PNI.                                                                            |
| 70. | Abe et al <sup>108</sup><br>2016      | Retrospective | HCC               | Japan | 46   | GPS (0/1,2)  | No mention of adjuvant treatment                            | N/A | 17  | N/A                                          | Multivariate:<br>7.718 (1.710-34.840)<br>p=0.008                                                | Multivariate:<br>Milan criteria                                                                                                                              |

|     |                                      |               |                                      |                   |                  |                             |                                                                                                                                                                                         |     |                          |                                              |                                                                                                           |                                                                                                                                                     |
|-----|--------------------------------------|---------------|--------------------------------------|-------------------|------------------|-----------------------------|-----------------------------------------------------------------------------------------------------------------------------------------------------------------------------------------|-----|--------------------------|----------------------------------------------|-----------------------------------------------------------------------------------------------------------|-----------------------------------------------------------------------------------------------------------------------------------------------------|
| 71. | Ishizuka et al <sup>21</sup><br>2016 | Retrospective | Colorectal<br>Cancer                 | Japan             | 627              | GPS (2/0, 1)                | No mention of<br>adjuvant treatment                                                                                                                                                     | 110 | 142                      | N/A                                          | Multivariate:<br>1.809 (1.181-2.772)<br>p=0.006                                                           | Multivariate:<br>Pathological<br>differentiation,<br>CEA, stage, CAR,<br>NLR                                                                        |
| 72. | Park <sup>109</sup><br>2016          | Retrospective | Colorectal<br>Cancer                 | United<br>Kingdom | 228              | GPS (0/1/2)                 | 131 received<br>adjuvant therapy                                                                                                                                                        | 66  | N/A                      | Multivariate:<br>1.59 (1.12-2.27)<br>p=0.010 | N/A                                                                                                       | Multivariate:<br>CD3 cancer cells<br>nest density<br>(low/high), NPS                                                                                |
| 73. | Park <sup>7</sup><br>2016            | Retrospective | Colorectal                           | United<br>Kingdom | 1000             | mGPS (0/1/2)                | Adjuvant therapy:<br>248<br>Neoadjuvant<br>therapy: 98                                                                                                                                  | 242 | 435                      | Multivariate:<br>1.28 (1.09-1.52)<br>p=0.003 | Multivariate:<br>1.28 (1.13-1.45) p<0.001                                                                 | Multivariate:<br>Age, Adjuvant<br>therapy, T stage,<br>N stage,<br>Differentiation,<br>Margins involved                                             |
| 74. | Fu et al <sup>110</sup><br>2016      | Retrospective | HCC                                  | China             | Training:<br>772 | GPS (0/1/2)<br>mGPS (0/1/2) | No mention of<br>adjuvant treatment                                                                                                                                                     | N/A | 377 (4-year<br>survival) | N/A                                          | Multivariate:<br><br>Training cohort:<br>mGPS 3.508 (1.384-<br>8.890) p=0.008                             | Multivariate:<br><br>AFP, GGT, IBS,<br>PLR, PI, tumour<br>size, tumour<br>number,<br>microscopic<br>vascular invasion,<br>differentiation,<br>BCLC. |
| 75. | Fan et al <sup>111</sup><br>2016     | Retrospective | Non-<br>small<br>Cell Lung<br>Cancer | China             | 1243             | GPS (0/1/2)<br>mGPS (0/1/2) | 684 patients<br>received<br>chemotherapy, 220<br>patients received<br>radiotherapy                                                                                                      | N/A | 373                      | N/A                                          | Multivariate:<br>GPS:<br>2.228 (1.447-3.431)<br>p< 0.0001<br><br>mGPS:<br>0.958 (0.633-1.452)<br>p=0.841  | Multivariate:<br>Gender, age, TNM<br>stage,<br>chemotherapy,<br>radiotherapy                                                                        |
| 76. | Chan et al <sup>112</sup><br>2016    | Retrospective | Colorectal<br>Cancer                 | Australia         | 386              | mGPS (0/1/2)                | Patients with high-<br>risk stage II and III<br>colon cancer disease<br>were generally<br>offered standard<br>adjuvant<br>chemotherapy,<br>whereas those with<br>stage II or III rectal | N/A | 353                      | N/A                                          | Univariate:<br>mGPS 1:<br>1.552 (0.892-2.700)<br>P=0.001<br><br>mGPS 2:<br>2.214 (1.454-3.369)<br>p=0.001 | Multivariate:<br>Age, T stage,<br>grade, LMR                                                                                                        |

|     |                                      |               |                                              |         |     |                                                                                     |                                                                                                   |     |                       |     |                                                                                                                          |                                                                        |
|-----|--------------------------------------|---------------|----------------------------------------------|---------|-----|-------------------------------------------------------------------------------------|---------------------------------------------------------------------------------------------------|-----|-----------------------|-----|--------------------------------------------------------------------------------------------------------------------------|------------------------------------------------------------------------|
|     |                                      |               |                                              |         |     |                                                                                     | cancers were usually treated with neoadjuvant                                                     |     |                       |     |                                                                                                                          |                                                                        |
| 77. | Walsh et al <sup>113</sup><br>2016   | Retrospective | Esophageal Cancer                            | Ireland | 223 | mGPS (0 vs. 1/2)                                                                    | 109 patients received neoadjuvant chemoradiotherapy, 66 patients received chemotherapy            | N/A | 104 (5-year survival) | N/A | Multivariate:<br>1.24 (0.69-2.22)<br>p=0.47                                                                              | Multivariate:<br>TNM stage, nodal status                               |
| 78. | Otowa et al <sup>114</sup><br>2016   | Retrospective | Oesophageal Cancer                           | Japan   | 100 | Pre-NAC mGPS (0/1-2)<br><br>Post-NAC mGPS (0/2)<br><br>NAC=neoadjuvant chemotherapy | All patients underwent NAC followed by surgery                                                    | N/A | 36                    | N/A | Multivariate:<br>Pre-NAC mGPS:<br>0.043 (0.001-1.311)<br>p=0.067<br><br>Post-NAC mGPS:<br>0.020 (0.018-0.621)<br>p=0.018 | Multivariate:<br>Grade of response to chemotherapy                     |
| 79. | Melling et al <sup>115</sup><br>2016 | Retrospective | Gastric Cancer                               | Germany | 88  | GPS (0/1/2)                                                                         | Any neoadjuvant/adjuvant therapy was an exclusion criteria                                        | N/A | 57                    | N/A | Multivariate:<br>OR 1.6 (1.0-2.4)<br>p=0.033                                                                             | Multivariate:<br>Nil else                                              |
| 80. | Toyokawa et al <sup>37</sup><br>2016 | Retrospective | Thoracic Oesophageal Squamous Cell Carcinoma | Japan   | 185 | GPS (0 vs 1/2)                                                                      | 46 patients received neoadjuvant treatment (39 chemotherapy, 6 chemoradiotherapy, 1 radiotherapy) | N/A | 77                    | N/A | Multivariate:<br>1.021 (0.465-2.245)<br>p=0.958                                                                          | Multivariate:<br>Sex, performance status, ASA, cTNM stage, CONUT score |

Table 2: Studies investigating the prognostic value of NLR in an unselected cohort of patients with operable cancer (Abbreviations: Red blood cell count, WBC: White blood cell count, Th (T-helper cells), D2-40 (Chalkley score), pT (T-stage), pN (N-stage), NSAIDS (Non-steroidal inflammatory drugs), CNP (combined NLR and PLR ratio), ER (estrogens receptor), FAP- $\alpha$  (Fibroblast activation protein- $\alpha$ ), PI (Prognostic index), KPS (Karnofsky Performance Score), MGMT (O<sup>6</sup>-methylguanine-DNA-methyltransferase), HR (herceptin receptor), FIGO (Federation of Gynecology and Obstetrics), LVSI (Lymphovascular space invasion), Red cell distribution (RDW), ECOG-PS (ECOG-performance status))

| No: NLR | Study                             | Type of Study | Cancer                           | Country        | Patients (n) | Measure of SIR | Additional Treatment                               | Cancer deaths (n) | Overall deaths (n)    | Cancer survival (HR, 95%CI) | Overall survival (HR, 95%CI)                  | Independent Prognostic Factors                                                                           |
|---------|-----------------------------------|---------------|----------------------------------|----------------|--------------|----------------|----------------------------------------------------|-------------------|-----------------------|-----------------------------|-----------------------------------------------|----------------------------------------------------------------------------------------------------------|
| 1.      | Halazun et al <sup>116</sup> 2008 | Retrospective | Colorectal Liver Metastases      | United Kingdom | 440          | NLR >5         | Adjuvant therapy of 5-FU/folinic acid              | N/A               | 395 (5-year survival) | N/A                         | Multivariate: 2.275 (1.654-3.129) p<0.0001    | Multivariate: Age, tumour number                                                                         |
| 2.      | Gomez et al <sup>117</sup> 2008   | Retrospective | Intrahepatic cholangiocarcinoma  | United Kingdom | 27           | NLR $\geq$ 5   | No mention of adjuvant or neoadjuvant treatment    | N/A               | 21                    | N/A                         | Multivariate: RR: 1.778 (0.558-5.668) p=0.331 | Multivariate: Nil else                                                                                   |
| 3.      | Sarraf et al <sup>118</sup> 2009  | Retrospective | Non Small Cell Lung Cancer       | United Kingdom | 177          | NLR (tertiles) | No mention of adjuvant or neoadjuvant treatment    | N/A               | 81 (5-year survival)  | N/A                         | Multivariate: 1.10 (1.03-1.17) p= 0.005       | Multivariate: Stage of disease                                                                           |
| 4.      | Kishi et al <sup>119</sup> 2009   | Retrospective | Colorectal Liver Metastases      | US             | 200          | NLR >5         | Neoadjuvant chemotherapy                           | N/A               | 118 (5-year survival) | N/A                         | Multivariate: 2.0 (1.0-3.8) p= 0.048          | Multivariate: Postoperative factors namely concomitant radiofrequency ablation (RFA) and surgical margin |
| 5.      | Cho et al <sup>120</sup> 2009     | Retrospective | Epithelial Ovarian Cancer        | South Korea    | 192          | NLR >2.6       | Adjuvant chemotherapy                              | N/A               | 20                    | N/A                         | Multivariate: 8.42 (1.09-64.84) p=0.041       | Multivariate: Age, stage                                                                                 |
| 6.      | Smith et al <sup>121</sup> 2009   | Retrospective | Pancreatic Ductal Adenocarcinoma | UK             | 110          | NLR continuous | 33 patients had adjuvant therapy                   | N/A               | 106                   | N/A                         | Univariate: 1.047 (0.985-1.113) p=0.14        | Multivariate: Lymphocyte count, PLR                                                                      |
| 7.      | Halazun et al <sup>122</sup> 2009 | Retrospective | HCC                              | US             | 150          | NLR $\geq$ 5   | 116 patients received pretransplant tumour therapy | N/A               | 61                    | N/A                         | Multivariate: 6.102 (2.286-16.290) p<0.0001   | Multivariate: Preoperative AFP                                                                           |

|     |                                      |               |                                  |                |      |                       |                                                 |                      |                       |                                            |                                                       |                                                                                                            |
|-----|--------------------------------------|---------------|----------------------------------|----------------|------|-----------------------|-------------------------------------------------|----------------------|-----------------------|--------------------------------------------|-------------------------------------------------------|------------------------------------------------------------------------------------------------------------|
| 8.  | Jagdev et al <sup>123</sup><br>2010  | Retrospective | Renal Cell Carcinoma             | UK             | 286  | Log (NLR)             | No mention of adjuvant or neoadjuvant treatment | 63 (5-year survival) | 111 (5-year survival) | Multivariate:<br>4.2 (1.6-11)<br>p=0.004   | Univariate:<br>2.1 (1.5-2.8)<br>p<0.001               | Multivariate:<br>Log CRP, stage, grade, RBC, WBC, M stage, necrosis, micro vascular invasion               |
| 9.  | Ubukata et al <sup>123</sup><br>2010 | Retrospective | Gastric Cancer                   | Japan          | 157  | NLR ≥5                | No neoadjuvant therapy.                         | N/A                  | 77                    | N/A                                        | Multivariate:<br>RR: 5.779 (0.950-35.170)<br>p=0.0001 | Multivariate:<br>Th1/ Th2 ratio, pathological stage, depth of invasion, tumour size, lymph node metastasis |
| 10. | Shimada et al <sup>124</sup><br>2010 | Retrospective | Gastric Cancer                   | Japan          | 1028 | NLR ≥4                | No mention of adjuvant or neoadjuvant treatment | 128                  | 147                   | N/A                                        | Multivariate:<br>1.845 (1.236-2.747)<br>p=0.003       | Multivariate:<br>Tumour depth, N factor, distant/ peritoneal metastasis, histology, platelet count         |
| 11. | Bhatti et al <sup>125</sup><br>2010  | Retrospective | Pancreatic ductal adenocarcinoma | UK             | 84   | NLR (continuous)      | 30 patients received adjuvant chemotherapy      | N/A                  | 66 (3-year survival)  | N/A                                        | Multivariate:<br>1.210 (1.010-1.449)<br>p=0.039       | Multivariate:<br>Lymphocyte count, resection margin                                                        |
| 12. | Mohri et al <sup>126</sup><br>2010   | Retrospective | Gastric Cancer                   | Japan          | 357  | NLR >2.2              | No neoadjuvant therapy                          | N/A                  | 98                    | N/A                                        | Multivariate:<br>2.78 (1.79-4.36)<br>p<0.0001         | Multivariate:<br>Tumour size, clinical T stage                                                             |
| 13. | Liu et al <sup>127</sup><br>2010     | Retrospective | Rectal carcinoma                 | China          | 123  | NLR >2                | Stage II cancers received adjuvant chemotherapy | N/A                  | 123                   | N/A                                        | Multivariate:<br>2.615 (1.152-5.933)<br>p=0.021       | Multivariate:<br>Depth of invasion, tumour size, CA12-5 level, stage                                       |
| 14. | Miyata et al <sup>124</sup><br>2011  | Retrospective | Oesophageal Cancer               | Japan          | 152  | NLR ≥4                | All patients received neoadjuvant chemotherapy  | N.A                  | 92 (5-year survival)  | N/A                                        | Multivariate:<br>1.30 (0.76-2.22)<br>p=0.3362         | Multivariate:<br>Clinical response, SI score, number of metastatic lymph nodes, operative complication     |
| 15. | Dutta et al <sup>62</sup><br>2011    | Retrospective | Oesophagus                       | United Kingdom | 112  | NLR (<2.5/ 2.5-5/ >5) | 31 had neoadjuvant and 14 adjuvant therapy      | 52                   | 59                    | Univariate:<br>1.08 (0.75-1.56)<br>p=0.686 | N/A                                                   | Multivariate:<br>Positive to total lymph node ratio (0/≤0.2/>0.2), mGPS                                    |

|     |                                       |               |                                |           |      |                |                                                                              |     |                                 |     |                                                           |                                                                                                   |
|-----|---------------------------------------|---------------|--------------------------------|-----------|------|----------------|------------------------------------------------------------------------------|-----|---------------------------------|-----|-----------------------------------------------------------|---------------------------------------------------------------------------------------------------|
| 16. | Kao et al <sup>128</sup><br>2011      | Retrospective | Malignant pleural mesothelioma | Australia | 85   | NLR $\geq$ 3   | 19 patients received neoadjuvant chemotherapy                                | N/A | 72 (5-year survival)            | N/A | Multivariate:<br>1.79 (1.04-3.07)<br>$p=0.04$             | Multivariate:<br>Gender, histological subtype, calretinin score, D2-40 score                      |
| 17. | Jung et al <sup>129</sup><br>2011     | Retrospective | Gastric cancer                 | Korea     | 293  | NLR $\geq$ 2   | 183 patients received adjuvant chemotherapy                                  | N/A | 166                             | N/A | Multivariate:<br>1.462 (1.033-2.068)<br>$p=0.032$         | Multivariate:<br>Combined resection radicalism, Lauren classification, postoperative chemotherapy |
| 18. | Sharaiha et al <sup>130</sup><br>2011 | Retrospective | Esophageal cancer              | US        | 295  | NLR $\geq$ 5   | 127 received neoadjuvant therapy (chemo/radiotherapy)                        | N/A | 160 (5-year survival)           | N/A | Multivariate:<br>2.32 (1.53-3.50)<br>$p<0.0001$           | Multivariate:<br>Age, sex, stage, tumour differentiation, comorbidities                           |
| 19. | Tomita et al <sup>131</sup><br>2011   | Retrospective | Non-small Cell Lung Cancer     | Japan     | 284  | NLR $\geq$ 2.5 | No mention of adjuvant or neoadjuvant treatment                              | N/A | 109 (5-year survival)           | N/A | Multivariate:<br>RR: 1.2863 (1.0462-1.5738)<br>$p=0.0173$ | Multivariate:<br>Age, histology, pT, pN, pleural lavage cytology                                  |
| 20. | Hung et al <sup>132</sup><br>2011     | Retrospective | Colon cancer                   | Taiwan    | 1040 | NLR $\geq$ 5   | No neoadjuvant therapy administered                                          | 122 | 334                             | N/A | Multivariate:<br>1.29 (1.07-1.80)<br>$p=0.012$            | Multivariate:<br>Age, CEA, examined lymph node no. <12, T stage, tumour obstruction/perforation   |
| 21. | Neal et al <sup>133</sup><br>2011     | Retrospective | Colorectal Liver Metastases    | UK        | 202  | NLR $\geq$ 5   | 84 patients had systemic chemotherapy in the 6 months before liver resection | N/A | 127 (5-year survival)           | N/A | Univariate:<br>2.51 (1.56-4.02)<br>$p<0.001$              | Multivariate:<br>Clinical risk score, neutrophil count, serum albumin                             |
| 22. | Asher et al <sup>134</sup><br>2011    | Retrospective | Ovarian Cancer                 | UK        | 235  | NLR $>$ 4      | 170 patients received chemotherapy                                           | N/A | 169 (survival after 150 months) | N/A | Multivariate:<br>0.865 (0.521-1.437)<br>$p=0.575$         | Multivariate:<br>Age, stage, residual disease, PLR                                                |
| 23. | Wang et al <sup>135</sup><br>2011     | Retrospective | HCC                            | China     | 101  | NLR $\geq$ 3   | 35 patients received pre-transplant tumour therapy                           | N/A | 51                              | N/A | Multivariate:<br>2.654 (1.419-4.964)<br>$p<0.001$         | Multivariate:<br>Tumour numbers, vascular invasion                                                |
| 24. | Bertuzzo et al <sup>136</sup><br>2011 | Retrospective | HCC                            | Italy     | 219  | NLR $\geq$ 5   | 159 patients received neoadjuvant treatments (TACE,                          | 27  | 61                              | N/A | Multivariate:<br>OR: 4.868 (2.473-9.582)<br>$p<0.0001$    | Multivariate:<br>Microvascular invasion                                                           |

|     |                                         |               |                           |                |     |                       |                                                                                                             |     |                      |                                                  |                                                     |                                                                       |
|-----|-----------------------------------------|---------------|---------------------------|----------------|-----|-----------------------|-------------------------------------------------------------------------------------------------------------|-----|----------------------|--------------------------------------------------|-----------------------------------------------------|-----------------------------------------------------------------------|
|     |                                         |               |                           |                |     |                       | PEI, RFA)                                                                                                   |     |                      |                                                  |                                                     |                                                                       |
| 25. | Idowu et al <sup>137</sup><br>2012      | Retrospective | Soft Tissue Sarcoma       | UK             | 223 | NLR ≥5                | No mention of adjuvant or neoadjuvant treatment                                                             | N/A | 44 (5-year survival) | N/A                                              | Multivariate:<br>5.125 (1.245-21.086)<br>p=0.024    | Multivariate:<br>Grade, surgical margin.                              |
| 26. | Ishizuka et al <sup>138</sup><br>2012   | Retrospective | Colorectal Cancer         | Japan          | 169 | NLR (continuous)      | Adjuvant chemotherapy in most patients                                                                      | 86  | 96                   | N/A                                              | Multivariate:<br>OR: 0.980 (0.870-1.106)<br>p=0.747 | Multivariate:<br>Tumour pathology                                     |
| 27. | Wang et al <sup>179</sup><br>2012       | Retrospective | Gastric                   | China          | 324 | NLR >5                | 210 patients had adjuvant chemotherapy                                                                      | N/A | 162                  | N/A                                              | Multivariate:<br>1.866 (0.901-3.866)<br>p=0.093     | Multivariate:<br>The 7 <sup>th</sup> TNM stage, adjuvant chemotherapy |
| 28. | Gondo et al <sup>139</sup><br>2012      | Retrospective | Bladder cancer            | Japan          | 189 | NLR ≥2.5              | 38 received intravesical chemotherapy                                                                       | 54  | N/A                  | Multivariate:<br>1.946 (1.035-3.663)<br>p=0.0387 | N/A                                                 | Multivariate:<br>Tumour size, Hb                                      |
| 29. | Kwon et al <sup>140</sup><br>2012       | Retrospective | Colorectal cancer         | Korea          | 200 | NLR ≥5                | 150 patients received adjuvant chemotherapy/chemoradiation                                                  | N/A | 39                   | N/A                                              | Multivariate:<br>1.520 (0.613-3.772)<br>p=0.367     | Multivariate:<br>Stage, CEA,PLR                                       |
| 30. | Carruthers et al <sup>141</sup><br>2012 | Retrospective | Rectal cancer             | UK             | 115 | NLR ≥5                | Neoadjuvant chemoradiation                                                                                  | N/A | 43                   | N/A                                              | Multivariate:<br>7.0 (2.6-19.2)<br>p<0.001          | Multivariate: Total WBC, platelet count, R status, down staging       |
| 31. | Dutta et al <sup>78</sup><br>2012       | Retrospective | Gastric                   | United Kingdom | 120 | NLR (<2.5/ 2.5-5/ >5) | Patients received both adjuvant and neoadjuvant therapy specific figures not given                          | 44  | 51                   | Univariate:<br>1.19 (0.76-1.87)<br>p=0.454       | N/A                                                 | Multivariate:<br>Positive lymph node ratio                            |
| 32. | Wang et al <sup>142</sup><br>2013       | Retrospective | Oesophageal Cacinosarcoma | China          | 33  | NLR≥5                 | 4 patients received adjuvant chemotherapy, 3 received adjuvant radiotherapy                                 | N/A | 14                   | N/A                                              | Multivariate:<br>138.47 (6.772-2831.214)<br>p=0.001 | Multivariate:<br>Nil else                                             |
| 33. | Choi et al <sup>143</sup><br>2013       | Retrospective | Soft Tissue Sarcoma       | Korea          | 162 | NLR >2.5              | 7 patients received neoadjuvant chemotherapy, 72 patients received adjuvant radiation, 36 patients received | 20  | 20                   | Multivariate:<br>OR: 1.32 (0.55-3.21) p=0.096    | N/A                                                 | Multivariate:<br>CRP, ESR, number of elevated markers                 |



|     |                                        |               |                          |           |                                              |                                            |                                                                                |     |                                                               |                                                 |                                                       |                                                                                                                                                   |
|-----|----------------------------------------|---------------|--------------------------|-----------|----------------------------------------------|--------------------------------------------|--------------------------------------------------------------------------------|-----|---------------------------------------------------------------|-------------------------------------------------|-------------------------------------------------------|---------------------------------------------------------------------------------------------------------------------------------------------------|
|     |                                        |               |                          |           |                                              |                                            | adjuvant chemotherapy                                                          |     |                                                               |                                                 |                                                       |                                                                                                                                                   |
| 34. | Szkandera et al <sup>144</sup><br>2013 | Retrospective | Soft Tissue Sarcoma      | Austria   | 260                                          | NLR <3.58vs. ≥3.58                         | 167 patients received adjuvant radiotherapy, 35 received adjuvant chemotherapy | N/A | 86                                                            | N/A                                             | Multivariate:<br>1.88 (1.14-3.12)<br>P=0.014          | Multivariate:<br>Sex, tumour necrosis, tumour stage                                                                                               |
| 35. | Krane et al <sup>145</sup><br>2013     | Retrospective | Bladder Cancer           | US        | 68                                           | NLR >2.5                                   | 10 patients received neoadjuvant chemotherapy                                  | 25  | 40                                                            | Multivariate:<br>RR 2.68 (1.01-8.59)            | Multivariate:<br>RR 2.49 (1.14-6.09)                  | Multivariate:<br>Hypoalbuminaemia, pT3, nodal disease.                                                                                            |
| 36. | Pichler et al <sup>146</sup><br>2013   | Retrospective | Renal Cell Carcinoma     | Austria   | 678                                          | NLR <3.3vs. ≥3.3                           | No mention of adjuvant or neoadjuvant treatment                                | 59  | 123                                                           | Multivariate:<br>1.59 (0.84-2.99)<br>P=0.148    | Multivariate:<br>1.59 (1.10-2.31)<br>P=0.014          | Multivariate:<br>Age, T stage, tumour grade, presence of tumour necrosis                                                                          |
| 37. | Jankova et al <sup>147</sup><br>2013   | Retrospective | Colorectal cancer        | Australia | 322                                          | NLR (continuous)                           | 7 patients received adjuvant radiotherapy, 197 received adjuvant chemotherapy  | 86  | 141                                                           | Multivariate:<br>1.01 (0.92-1.12)<br>P=0.782    | Multivariate:<br>1.06 (1.01-1.12)<br>P=0.013          | Multivariate:<br>Age, direct spread beyond muscularis propria, nodes involvement, adjacent structure infiltrated, postoperative chemotherapy, sex |
| 38. | Fu et al <sup>148</sup><br>2013        | Retrospective | Hepatocellular Carcinoma | China     | 282                                          | NLR>2                                      | No mention of adjuvant or neoadjuvant treatment                                | N/A | 173                                                           | N/A                                             | Multivariate:<br>1.434 (1.044-1.970)<br>P=0.026       | Multivariate:<br>Tumour size, tumour number, macroscopic vascular invasion, Child-Pugh class                                                      |
| 39. | Shibutani et al <sup>149</sup><br>2013 | Retrospective | Colorectal Cancer        | Japan     | 674                                          | NLR ≥2.5                                   | No mention of adjuvant or neoadjuvant treatment                                | 136 | 177                                                           | Multivariate:<br>1.609 (1.117-2.319)<br>P=0.011 | N/A                                                   | Multivariate:<br>Tumour diameter, lymph node metastasis, distant metastasis                                                                       |
| 40. | Forget et al <sup>150</sup><br>2013    | Retrospective | Breast Cancer            | Belgium   | Centre 1:<br>n=172<br><br>Centre 2:<br>n=162 | Centre 1: NLR. ≥4<br><br>Centre 2: NLR. ≥3 | No mention of adjuvant or neoadjuvant treatment                                | N/A | Centre 1: 17 (at 60 months)<br><br>Centre 2: 8 (at 24 months) | N/A                                             | Centre 1:<br>Univariate<br>0.51 (0.35-8.58)<br>P=0.47 | Univariate:<br>Ketorolac or diclofenac use                                                                                                        |

|     |                                         |               |                                          |         |     |                                                                                               |                                                                                  |                      |                       |                                               |                                                                                                                                                                          |                                                                                              |
|-----|-----------------------------------------|---------------|------------------------------------------|---------|-----|-----------------------------------------------------------------------------------------------|----------------------------------------------------------------------------------|----------------------|-----------------------|-----------------------------------------------|--------------------------------------------------------------------------------------------------------------------------------------------------------------------------|----------------------------------------------------------------------------------------------|
|     |                                         |               |                                          |         |     |                                                                                               |                                                                                  |                      |                       |                                               | Centre 2:<br>Univariate<br>4.00 (1.12-14.3)<br>P=0.03                                                                                                                    |                                                                                              |
| 41. | Forget et al <sup>150</sup><br>2013     | Retrospective | NSCLC                                    | Belgium | 255 | NLR $\geq$ 5                                                                                  | No mention of adjuvant or neoadjuvant treatment                                  | N/A                  | 109 (at 60 months)    | N/A                                           | Univariate:<br>1.52 (1.07-2.17) P=0.02                                                                                                                                   | Multivariate:<br>Pneumonectomy, Ketorolac (vs. no NSAIDS)                                    |
| 42. | Forget et al <sup>150</sup><br>2013     | Retrospective | Kidney Cancer                            | Belgium | 227 | NLR $\geq$ 5                                                                                  | No mention of adjuvant or neoadjuvant treatment                                  | N/A                  | 64 (at 60 months)     | N/A                                           | Multivariate:<br>1.67 (1.0-2.81) p=0.05                                                                                                                                  | Multivariate:<br>Node status, stage, histological stage                                      |
| 43. | Absenger et al <sup>151</sup><br>2013   | Retrospective | Colon Cancer                             | Austria | 372 | dNLR ( $\leq$ 2.2 vs. $>$ 2.2)<br><br>preoperative NLR $>$ 4<br><br>preoperative NLR $\geq$ 5 | 230 patients received adjuvant chemotherapy                                      | N/A                  | 72                    | N/A                                           | Multivariate:<br>dNLR<br>1.78 (1.07-2.97) p=0.026<br><br>Preoperative NLR $>$ 4<br>2.22 (1.36-3.62) p=0.002<br><br>Preoperative NLR $\geq$ 5<br>1.68 (1.03-2.73) p=0.037 | Multivariate:<br>Clinical stage                                                              |
| 44. | Feng et al <sup>18</sup><br>2013        | Retrospective | Oesophageal Squamous Cell Carcinoma      | China   | 483 | NLR $>$ 3.45                                                                                  | No mention of adjuvant or neoadjuvant treatment                                  | N/A                  | 244                   | N/A                                           | Multivariate:<br>1.310 (0.997-1.722)<br>p=0.053                                                                                                                          | Multivariate:<br>Differentiation, depth of invasion, node metastasis, PLR, CNP               |
| 45. | Mano et al <sup>152</sup><br>2013       | Retrospective | Hepatocellular Carcinoma                 | Japan   | 958 | NLR $\geq$ 2.81                                                                               | No mention of adjuvant or neoadjuvant treatment                                  | N/A                  | 310 (5-year survival) | N/A                                           | Multivariate:<br>3.745 (1.027-1.088)<br>p=0.0002                                                                                                                         | Multivariate:<br>Albumin, tumour size, portal vein thrombus, stage, multiple tumours         |
| 46. | Azuma et al <sup>153</sup><br>2013      | Retrospective | Upper Urinary Tract Urothelial Carcinoma | Japan   | 137 | NLR $\geq$ 2.5                                                                                | No mention of adjuvant or neoadjuvant treatment                                  | 54 (5-year survival) | N/A                   | Multivariate:<br>3.06 (1.44-6.83)<br>p=0.0035 | N/A                                                                                                                                                                      | Multivariate:<br>pTstage, lymphovascular invasion                                            |
| 47. | Dumitrascu et al <sup>154</sup><br>2013 | Retrospective | Hilar Cholangiocarcinoma                 | Romania | 90  | NLR $<$ 3.3                                                                                   | 43 received adjuvant treatment (chemotherapy, radiotherapy or chemoradiotherapy) | 51                   | 56                    | N/A                                           | Multivariate:<br>RR 0.76 (0.57-1)<br>p=0.053                                                                                                                             | Multivariate:<br>Adjuvant chemotherapy with gemcitabine, R0 resection, caudate lobe invasion |

|     |                                          |               |                            |                |     |                |                                                                                                                                            |                      |                       |                                                       |                                                 |                                                                           |
|-----|------------------------------------------|---------------|----------------------------|----------------|-----|----------------|--------------------------------------------------------------------------------------------------------------------------------------------|----------------------|-----------------------|-------------------------------------------------------|-------------------------------------------------|---------------------------------------------------------------------------|
| 48. | Perisanidis et al <sup>155</sup><br>2013 | Retrospective | Oral Cancer                | Austria        | 97  | NLR >1.9       | All patients treated with neoadjuvant chemoradiotherapy                                                                                    | 17                   | 35                    | Multivariate:<br>10.37 (1.28-84.08)<br>p=0.029        | N/A                                             | Multivariate:<br>ypTNM,<br>perineural<br>invasion                         |
| 49. | Noh et al <sup>156</sup><br>2013         | Retrospective | Breast Cancer              | Korea          | 442 | NLR ≥2.5       | Triple negative cancers are treated with chemotherapy                                                                                      | 25 (5-year survival) | 32                    | Multivariate:<br>4.08 (1.62-10.28)<br>p=0,003         | N/A                                             | Multivariate:<br>Node status, ER status                                   |
| 50. | Liao et al <sup>157</sup><br>2013        | Retrospective | Non-small Cell Lung Cancer | China          | 59  | NLR continuous | Patients who underwent neoadjuvant chemotherapy and/or radiotherapy were excluded                                                          | N/A                  | 23 (after 40 months)  | N/A                                                   | Multivariate:<br>1.00 (0.40-2.49)<br>p=0.98     | Multivariate:<br>Tumour differentiation,<br>FAP-α percentage/<br>grade.   |
| 51. | Bambury et al <sup>158</sup><br>2013     | Retrospective | Glioblastoma multiforme    | Ireland        | 84  | NLR >4         | 49 patients received complete Stupp protocol (using concurrent chemoradiotherapy followed by consolidation chemotherapy with temozolomide) | N/A                  | 82                    | N/A                                                   | Multivariate:<br>1.81 (1.08-3.01)<br>p=0.025    | Multivariate:<br>Age, gender,<br>extent of resection, full Stupp protocol |
| 52. | Toiyama et al <sup>159</sup><br>2013     | Retrospective | Rectal Cancer              | Japan          | 84  | NLR >3         | All patients received neoadjuvant chemoradiotherapy                                                                                        | N/A                  | 37 (after 150 months) | N/A                                                   | Multivariate:<br>0.98 (0.37-2.56)<br>p=0.96     | Multivariate:<br>Pathological TNM stage, CRP                              |
| 53. | Son et al <sup>89</sup><br>2013          | Retrospective | Colon Cancer               | Korea          | 624 | NLR ≥5         | 503 patients received chemotherapy                                                                                                         | N/A                  | 55 (5 yr survival)    | N/A                                                   | Multivariate:<br>1.841 (0.470-7.204)<br>p=0.381 | Multivariate:<br>Fibrinogen, stage, CEA                                   |
| 54. | Stoz et al <sup>84</sup><br>2013         | Retrospective | Pancreatic Cancer          | Austria        | 110 | NLR≥5          | 88 Underwent chemotherapy                                                                                                                  | N/A                  | 110                   | Multivariate:<br>1.611 (1.024-2.534) p=0.039          | N/A                                             | Multivariate:<br>Stage at diagnosis, NLR                                  |
| 55. | Guthrie et al <sup>47</sup><br>2013      | Retrospective | Colorectal                 | United Kingdom | 206 | NLR>5          | 58 patients had adjuvant chemotherapy                                                                                                      | 29                   | 41                    | Multivariate<br>Pre-Op:<br>3.07 (1.23–7.63)<br>P<0.05 | N/A                                             | Multivariate:<br>Pre-Op and Post-Op mGPS                                  |
| 56. | Ishizuka et al <sup>14</sup><br>2013     | Retrospective | Colorectal                 | Japan          | 481 | NLR>3          | Patients with stage IV disease had chemotherapy                                                                                            | 120                  | 150                   | Univariate:<br>OR: 0.961 (0.843-1.096) p=0.554        | N/A                                             | Multivariate:<br>Pathology, LN Mets, CRP, Albumin, CEA, GPS               |

|     |                                        |               |                                          |           |                                                               |                   |                                                                                                                                                                                        |                                        |                                        |                                                                                                                   |                                                                                                               |                                                                        |
|-----|----------------------------------------|---------------|------------------------------------------|-----------|---------------------------------------------------------------|-------------------|----------------------------------------------------------------------------------------------------------------------------------------------------------------------------------------|----------------------------------------|----------------------------------------|-------------------------------------------------------------------------------------------------------------------|---------------------------------------------------------------------------------------------------------------|------------------------------------------------------------------------|
| 57. | Szkandera et al <sup>160</sup><br>2014 | Retrospective | Soft Tissue Sarcoma                      | Austria   | 340<br>Training set,<br>n=170<br><br>Validation set,<br>n=170 | NLR ≥5            | Training set:<br>16 received adjuvant chemotherapy, 102 received adjuvant radiotherapy<br><br>Validation set:<br>22 received adjuvant chemotherapy, 107 received adjuvant radiotherapy | Training set: 30<br>Validation set: 22 | Training set: 53<br>Validation set: 51 | Univariate:<br>Training set:<br>2.14 (0.81-5.66)<br>p=0.124<br><br>Validation set:<br>1.98 (0.77-5.08)<br>p=0.153 | Multivariate:<br>Training set:<br>1.68 (0.75-3.76) p=0.201<br><br>Validation set:<br>2.84 (1.37-5.87) p=0.005 | Multivariate:<br>Age, tumour grade, LMR, tumour size                   |
| 58. | Dalpiatz et al <sup>161</sup><br>2014  | Retrospective | Upper Tract Urothelial Carcinoma         | Austria   | 202                                                           | NLR ≥2.7          | No mention of adjuvant or neoadjuvant treatment                                                                                                                                        | 58                                     | 147                                    | Multivariate:<br>2.718 (1.246-5.928)<br>P=0.012                                                                   | Multivariate:<br>2.480 (1.308-4.702)<br>P=0.005                                                               | Multivariate:<br>pT stage                                              |
| 59. | Luo et al <sup>162</sup><br>2014       | Retrospective | Upper Urinary Tract Urothelial Carcinoma | Taiwan    | 234                                                           | NLR >3            | Patients underwent RNU without neoadjuvant or adjuvant intervention.                                                                                                                   | 24                                     | N/A                                    | Multivariate:<br>6.38 (1.75-23.31)<br>p=0.006                                                                     | N/A                                                                                                           | Multivariate:<br>Pathological stage, age, smoking                      |
| 60. | Wu et al <sup>95</sup><br>2014         | Retrospective | Gallbladder                              | China     | 85                                                            | NLR >2.3          | 13 patients had post op chemotherapy                                                                                                                                                   | N/A                                    | 75                                     | N/A                                                                                                               | Univariate:<br>1.769 (1.111-2.818)<br>p=0.016                                                                 | Multivariate:<br>Tumour Invasion, Lymph node metastasis, Margin status |
| 61. | Zhang et al <sup>163</sup><br>2014     | Retrospective | Non-Small Cell Lung Cancer               | China     | 400                                                           | NLR <3.3 vs. ≥3.3 | Patients treated with neoadjuvant and adjuvant therapy were excluded                                                                                                                   | 86                                     | N/A                                    | N/A                                                                                                               | Multivariate:<br>2.075 (1.317-3.271)<br>p=0.002                                                               | Multivariate:<br>Age, tumour size                                      |
| 62. | Ying et al <sup>164</sup><br>2014      | Retrospective | Colorectal Cancer                        | China     | 205                                                           | NLR ≥3.12         | 77 colon and 31 rectal cancer patients underwent chemotherapy                                                                                                                          | 100                                    | 112                                    | Multivariate:<br>2.77 (1.72-4.46)<br>p<0.001                                                                      | Multivariate:<br>2.73 (1.74-4.29)<br>p<0.001                                                                  | Multivariate:<br>Grade (G3/G4), chemotherapy                           |
| 63. | Linton et al <sup>165</sup><br>2014    | Retrospective | Malignant Pleural Mesothelioma           | Australia | 59                                                            | NLR. ≥5           | 64% received adjuvant radiotherapy, 33% received induction or adjuvant chemotherapy                                                                                                    | N/A                                    | 24 (survival >20 months)               | N/A                                                                                                               | Survival after 4 months<br>Univariate:<br><br>NLR ≥5 0.86 (0.40-1.82)<br>p=0.69                               | Multivariate:<br>Nil else                                              |

|     |                                       |               |                                  |             |     |                             |                                                                                                                     |     |     |                                                  |                                                     |                                                                                                                          |
|-----|---------------------------------------|---------------|----------------------------------|-------------|-----|-----------------------------|---------------------------------------------------------------------------------------------------------------------|-----|-----|--------------------------------------------------|-----------------------------------------------------|--------------------------------------------------------------------------------------------------------------------------|
| 64. | Ishizuka et al <sup>15</sup><br>2014  | Retrospective | Gastric Cancer                   | Japan       | 544 | NLR ( $\leq 3$ vs. $>3$ )   | 343 patients received adjuvant chemotherapy                                                                         | 55  | 108 | N/A                                              | Univariate:<br>1.990 (1.417-2.793)<br>$p < 0.001$   | Multivariate:<br>Age, tumour type, lymph node metastasis, albumin, COP-NLR                                               |
| 65. | Kubo et al <sup>166</sup><br>2014     | Retrospective | Colorectal carcinoma             | Japan       | 524 | NLR (high/low)              | Adjuvant chemotherapy in 156 patients with stage 3 cancer and 38 patients with stage 2 cancer                       | 74  | 104 | Multivariate:<br>1.71 (1.03-2.88)<br>$p = 0.04$  | N/A                                                 | Multivariate:<br>Cancer site, T stage, lymph node metastasis                                                             |
| 66. | Viers et al <sup>167</sup><br>2014    | Retrospective | Clear Cell Renal Carcinoma       | US          | 827 | NLR (continuous)            | No mention of adjuvant or neoadjuvant treatment                                                                     | 233 | 436 | Multivariate:<br>1.02 (1.01-1.04)<br>$p = 0.009$ | Multivariate:<br>1.02 (1.01-1.03)<br>$p = 0.004$    | Multivariate:<br>ECOG performance status, tumour size, constitutional symptoms, age                                      |
| 67. | Koh et al <sup>168</sup><br>2014      | Retrospective | Breast Cancer                    | South Korea | 157 | NLR $>2.25$ )               | All treated with neoadjuvant chemotherapy                                                                           | N/A | 25  | N/A                                              | Multivariate:<br>24.87 (3.075-201.3)<br>$p = 0.003$ | Multivariate:<br>Nil else                                                                                                |
| 68. | Hermanns et al <sup>169</sup><br>2014 | Retrospective | Bladder cancer                   | Canada      | 424 | NLR $\geq 3$                | 29 patients received neo-adjuvant chemotherapy, 87 received adjuvant chemotherapy, 55 received salvage chemotherapy | 110 | 178 | Multivariate:<br>1.88 (1.39-2.54)<br>$p < 0.001$ | Multivariate:<br>1.67 (1.17-2.39)<br>$p = 0.005$    | Multivariate:<br>Charlson Comorbidity Index, Hb, platelets, N-stage, year of radical cystectomy, lymphovascular invasion |
| 69. | Tanaka et al <sup>170</sup><br>2014   | Retrospective | Upper Tract Urothelial Carcinoma | Japan       | 665 | NLR $>3$                    | 129 patients received adjuvant chemotherapy                                                                         | 129 | N/A | Multivariate:<br>1.47 (1.03-2.11)<br>$p = 0.036$ | N/A                                                 | Multivariate:<br>Age, pathological T stage, lymphovascular invasion, lymph node involvement                              |
| 70. | Jiang et al <sup>171</sup><br>2014    | Retrospective | Gastric Cancer                   | China       | 377 | NLR $<1.44$ vs. $\geq 1.44$ | 219 patients received adjuvant chemotherapy post gastrectomy                                                        | N/A | 223 | N/A                                              | Multivariate:<br>1.595 (1.045-2.435)<br>$p = 0.030$ | Multivariate:<br>Tumour size, serosal invasion, lymph node metastasis, post complication                                 |

|     |                                       |               |                                            |                |                                              |                     |                                                                                                                                     |     |     |                                              |                                                                                              |                                                                                                                                |
|-----|---------------------------------------|---------------|--------------------------------------------|----------------|----------------------------------------------|---------------------|-------------------------------------------------------------------------------------------------------------------------------------|-----|-----|----------------------------------------------|----------------------------------------------------------------------------------------------|--------------------------------------------------------------------------------------------------------------------------------|
| 71. | Yuan et al <sup>172</sup><br>2014     | Retrospective | Adenocarcinoma of Esophagogastric Junction | China          | 327                                          | NLR <5 vs. ≥5       | 18 patients received neoadjuvant chemotherapy, 59 patients received adjuvant chemotherapy                                           | N/A | 168 | N/A                                          | Multivariate:<br>2.551 (1.847-3.524)<br>p<0.0001                                             | Multivariate:<br>pTNM stage, adjuvant treatment                                                                                |
| 72. | Ozdemir et al <sup>173</sup><br>2014  | Retrospective | Colorectal Cancer                          | Turkey         | 281                                          | NLR (≤2.2 vs. >2.2) | Patients with lymph node invasion, vascular invasion, perineural invasion and high neoadjuvant CEA were given adjuvant chemotherapy | N/A | 134 | N/A                                          | Multivariate:<br>3.306 (1.713-6.378)<br>p=0.005                                              | Multivariate:<br>pN stage, pTNM stage.                                                                                         |
| 73. | Dalpiaz et al <sup>161</sup><br>2014  | Retrospective | Upper Tract Urothelial Carcinoma           | Austria        | 171                                          | dNLR (continuous),  | No mention of adjuvant or neoadjuvant treatment                                                                                     | 54  | 79  | Multivariate:<br>1.16 (1.01-1.35)<br>p=0.045 | Multivariate:<br>1.21 (1.09-1.34)<br>p<0.001                                                 | Multivariate:<br>Age at operation, pT-stage                                                                                    |
| 74. | Feng et al <sup>174</sup><br>2014     | Retrospective | Esophageal SCC                             | China          | 483                                          | NLR ≥3.5            | No mention of adjuvant or neoadjuvant treatment                                                                                     | N/A | 244 | N/A                                          | Multivariate:<br>1.339 (1.015-1.768)<br>p=0.039                                              | Multivariate:<br>Differentiation, depth of invasion, nodal metastasis, PLR                                                     |
| 75. | Viers et al <sup>175</sup><br>2014    | Retrospective | Bladder Cancer                             | USA            | 899                                          | NLR (continuous)    | 117 patients received adjuvant therapy (radiation or chemotherapy)                                                                  | 345 | 615 | Multivariate:<br>1.04 (1.01-1.08)<br>p=0.01  | Multivariate:<br>1.03 (1.01-1.06) p=0.01                                                     | Multivariate:<br>Age at surgery, ECOG performance status, pathologic tumour stage, lymph node density, lymphovascular invasion |
| 76. | McNamara et al <sup>176</sup><br>2014 | Retrospective | Biliary Tract Cancer                       | Canada         | 326                                          | NLR ≥3              | 90 received adjuvant chemotherapy                                                                                                   | N/A | 199 | N/A                                          | Multivariate:<br>1.15 (0.87-1.53) p=0.33                                                     | Multivariate:<br>Site, stage, age                                                                                              |
| 77. | East et al <sup>30</sup><br>2014      | Retrospective | Colon Cancer                               | United Kingdom | 436<br>Training set, n=386<br>Test set, n=50 | NLR ≥3.4            | 26 patients received adjuvant chemotherapy                                                                                          | N/A | 27  | N/A                                          | Multivariate:<br>Training set: 1.43 (1.06-1.94) p=0.02<br>Test set: 3.40 (2.64-5.13) p<0.001 | Multivariate:<br>N stage, R0 resection, adjuvant treatment, T stage, WLR.                                                      |

|     |                                        |               |                                  |                |     |          |                                                                                                                           |     |                      |                                            |                                                    |                                                                                                                                             |
|-----|----------------------------------------|---------------|----------------------------------|----------------|-----|----------|---------------------------------------------------------------------------------------------------------------------------|-----|----------------------|--------------------------------------------|----------------------------------------------------|---------------------------------------------------------------------------------------------------------------------------------------------|
| 78. | Maliotzis et al <sup>177</sup><br>2014 | Retrospective | Colorectal Cancer                | United Kingdom | 506 | NLR >3   | All patients with neoadjuvant or adjuvant therapy were excluded                                                           | 28  | 118                  | N/A                                        | Multivariate:<br>OR: 1.23 (0.80-1.90)<br>p=0.347   | Multivariate:<br>Age at operation, T stage, N stage, surgical approach, ASA score, major complication                                       |
| 79. | Grivas et al <sup>178</sup><br>2014    | Retrospective | Renal Cell Carcinoma             | Greece         | 114 | NLR ≥2.7 | No patients received adjuvant therapy                                                                                     | 10  | 14                   | N/A                                        | Multivariate:<br>2.866<br>p=0.034                  | Multivariate:<br>Hb level, Fuhrman grade                                                                                                    |
| 80. | Shen et al <sup>179</sup><br>2014      | Retrospective | Rectal Cancer                    | China          | 199 | NLR ≥2.8 | All patients treated with neoadjuvant chemoradiotherapy followed by surgery, 184 patients received adjuvant chemotherapy. | N/A | 43                   | N/A                                        | Multivariate:<br>2.123 (1.140-3.954)<br>p=0.018    | Multivariate:<br>ypTNM staging, adjuvant chemotherapy                                                                                       |
| 81. | Sun et al <sup>96</sup><br>2014        | Retrospective | Colon cancer                     | China          | 255 | NLR ≥5   | No specific mention of neoadjuvant or adjuvant treatment                                                                  | N/A | 94                   | N/A                                        | Multivariate:<br>RR 1.541 (0.724-3.282)<br>p=0.262 | Multivariate:<br>AFP, CEA, fibrinogen, TNM, mGPS                                                                                            |
| 82. | Neofytou et al <sup>180</sup><br>2014  | Retrospective | Liver-only Colorectal Metastases | UK             | 140 | NLR >2.4 | All patients received neoadjuvant chemotherapy                                                                            | N/A | 59 (5-year survival) | N/A                                        | Multivariate:<br>1.52 (0.78-2.99)<br>p=0.216       | Multivariate:<br>No adjuvant chemotherapy                                                                                                   |
| 83. | Aurello et al <sup>32</sup><br>2014    | Retrospective | Gastric Cancer                   | Italy          | 102 | NLR ≥5   | 68 patients received adjuvant chemotherapy after surgery                                                                  | 62  | 62                   | N/A                                        | Multivariate:<br>1.51 (0.69-3.28)<br>p=0.29        | Multivariate:<br>Prognostic index, mGPS, Tumour stage IV, PI 1&2                                                                            |
| 84. | Pinato et al <sup>91</sup><br>2014     | Retrospective | Lung                             | United Kingdom | 220 | NLR>5    | Adjuvant radio and chemotherapy administered                                                                              | N/A | 61                   | N/A                                        | Multivariate:<br>3.8 (1.6–8.9) p=0.002             | Multivariate:<br>TNM stage, Pleural Effusion                                                                                                |
| 85. | Forrest et al <sup>94</sup><br>2014    | Retrospective | Colorectal                       | United Kingdom | 134 | NLR>5    | No mention of Adjuvant treatment                                                                                          | 43  | 81                   | Univariate:<br>2.27 (0.99-5.19)<br>p=0.052 | N/A                                                | Univariate: T-stage, N-stage, TNM stage, Venous invasion, Peritoneal involvement, Margin involvement, Manual and Automatic Klintrup–Mäkinen |

|     |                                        |               |                                   |       |     |                |                                                                                               |     |                       |                                                  |                                                  | grade                                                                                                  |
|-----|----------------------------------------|---------------|-----------------------------------|-------|-----|----------------|-----------------------------------------------------------------------------------------------|-----|-----------------------|--------------------------------------------------|--------------------------------------------------|--------------------------------------------------------------------------------------------------------|
| 86. | Song et al <sup>181</sup><br>2015      | Retrospective | Hypopharyngeal SCC                | China | 146 | NLR $\geq$ 2.3 | 14 patients received adjuvant chemoradiotherapy<br><br>94 received adjuvant radiotherapy      | N/A | 75 (3-year survival)  | N/A                                              | Multivariate:<br>2.36 (1.33-4.18)<br>p0.003      | Multivariate:<br>Treatment modalities                                                                  |
| 87. | Xu et al <sup>22</sup><br>2015         | Retrospective | Oesophageal SCC                   | China | 468 | NLR>2.40       | 196 patient received adjuvant chemo and radiotherapy                                          | N/A | 259                   | N/A                                              | Univariate:<br>1.50 (1.17-2.83) p=0.008          | Multivariate:<br>Lymph Node Mets,<br>Venous/lymphatic invasion, CRP/Alb Ration                         |
| 88. | Hirahara <sup>103</sup><br>2015        | Retrospective | Oesophageal                       | Japan | 141 | NLR $\geq$ 2.5 | No mention of adjuvant treatment                                                              | N/A | 16                    | N/A                                              | Univariate:<br>1.164 (0.616-2.126)<br>p=0.631    | Multivariate:<br>pStage, GPS                                                                           |
| 89. | Shibutani <sup>104</sup><br>2015       | Retrospective | Colorectal                        | Japan | 254 | NLR>2.5        | Adjuvant chemotherapy                                                                         | N/A | 69                    | N/A                                              | Multivariate:<br>6.599 (0.928-46.914)<br>p=0.059 | Multivariate:<br>NLR (Post op),<br>Number of lymph node mets                                           |
| 90. | Takahashi et al <sup>182</sup><br>2015 | Retrospective | Non-small Cell Lung Cancer        | Japan | 342 | NLR $\geq$ 2.5 | Patients who had received neoadjuvant chemotherapy or thoracic irradiation were not included. | N/A | 51 (5-year survival)  | N/A                                              | Multivariate:<br>2.141 (1.306-3.515)<br>p=0.003  | Multivariate:<br>Smoking, CEA,,<br>nonadenocarcinoma, pathological stage, presence of pleural invasion |
| 91. | Tu et al <sup>183</sup><br>2015        | Retrospective | Laryngeal Squamous Cell Carcinoma | China | 141 | NLR >2.17      | No mention of adjuvant treatment                                                              | N/A | 45                    | N/A                                              | Multivariate :<br>2.177 (1.208-3.924)<br>p=0.010 | Multivariate:<br>T classification,<br>lymph node metastasis                                            |
| 92. | Shin et al <sup>184</sup><br>2015      | Retrospective | Colorectal Cancer                 | Korea | 269 | NLR. $\geq$ 3  | Patients treated with chemoradiation were excluded                                            | 5   | N/A                   | Multivariate:<br>6.190 (1.034-37.047)<br>p=0.046 | N/A                                              | Multivariate;<br>Thrombocytosis                                                                        |
| 93. | Que et al <sup>185</sup><br>2015       | Retrospective | Soft-tissue Sarcoma               | China | 222 | NLR $\geq$ 2.5 | 39 patients received adjuvant chemotherapy, 65 patients received adjuvant                     | N/A | 82 (after 150 months) | N/A                                              | Multivariate:<br>1.06 (0.52-2.16)<br>p=0.881     | Multivariate:<br>Tumour site, AJCC stage, PLR                                                          |



|      |                                       |               |                                  |        |                              |                  |                                                                                            |     |                       |                                            |                                                                  |                                                                                                            |
|------|---------------------------------------|---------------|----------------------------------|--------|------------------------------|------------------|--------------------------------------------------------------------------------------------|-----|-----------------------|--------------------------------------------|------------------------------------------------------------------|------------------------------------------------------------------------------------------------------------|
|      |                                       |               |                                  |        |                              |                  | radiotherapy                                                                               |     |                       |                                            |                                                                  |                                                                                                            |
| 94.  | Hsu et al <sup>186</sup><br>2015      | Retrospective | Gastric Cancer                   | Taiwan | 989                          | NLR >3.44        | 499 patients with stage 2 to 4 tumour received chemotherapy                                | N/A | 395 (5-year survival) | N/A                                        | Multivariate:<br>1.565 (1.198-2.044)<br>p=0.001                  | Multivariate:<br>Resection margin, differentiation, T status, N status, LN ratio, M1 status                |
| 95.  | Shimizu et al <sup>187</sup><br>2015  | Retrospective | Non-small Cell Lung Cancer       | Japan  | 334                          | NLR ≥2.5         | Neither radiotherapy nor chemotherapy administered prior to the surgery                    | N/A | 95 (3 year survival)  | N/A                                        | Multivariate:<br>1.60 (1.04-2.54)<br>p=0.048                     | Multivariate:<br>Age, nodal metastasis, PNI                                                                |
| 96.  | Han et al <sup>188</sup><br>2015      | Retrospective | Glioblastoma                     | China  | 152                          | NLR ≥4           | All patients received adjuvant radio-chemotherapy                                          | N/A | 118 (2-year survival) | N/A                                        | Multivariate:<br>1.050 (1.003-1.100)<br>p=0.037                  | Multivariate:<br>KPS, resection, MGMT promoter, PLR                                                        |
| 97.  | Liao et al <sup>189</sup><br>2015     | Retrospective | Hepatocellular Carcinoma         | China  | 222                          | NLR >2.1         | 69 patients received transcatheter arterial chemoembolization (TACE) 1 month post surgery. | N/A | 77 (5-year survival)  | N/A                                        | Multivariate:<br>3.013 (1.633-5.561)<br>p=0.014                  | Multivariate:<br>Neutrophil count, postoperative TACE                                                      |
| 98.  | Aldemir et al <sup>190</sup><br>2015  | Retrospective | Gastric Cancer                   | Turkey | 53                           | NLR ≥2.75        | No mention of adjuvant treatment                                                           | N/A | 19                    | N/A                                        | Univariate:<br>p=0.88                                            | Univariate:<br>ECOG performance status, platelet count                                                     |
| 99.  | Kadota et al <sup>191</sup><br>2015   | Retrospective | Lung Squamous Cell Carcinoma     | US     | 485<br>Training cohort n=331 | NLR >5.5         | 80% patients received adjuvant therapy                                                     | N/A | Training cohort n=188 | N/A                                        | In training cohort<br>Univariate:<br>1.82 (1.26-2.62)<br>p=0.001 | Multivariate:<br>Smoking pack-year, pathological stage, CD10/CD20 risk index, age, lymphovascular invasion |
| 100. | Neofytou et al <sup>192</sup><br>2015 | Retrospective | Liver-Only Colorectal Metastases | UK     | 140                          | NLR (continuous) | All patients received neoadjuvant chemotherapy, 104 received adjuvant chemotherapy.        | 60  | 63                    | Univariate:<br>1.20 (1.06-1.36)<br>p=0.003 | N/A                                                              | Multivariate:<br>Adjuvant chemotherapy, preoperative LMR.                                                  |

|      |                                      |               |                            |                |                                                          |           |                                                                                                   |                 |                                                               |                                           |                                                 |                                                                                                  |
|------|--------------------------------------|---------------|----------------------------|----------------|----------------------------------------------------------|-----------|---------------------------------------------------------------------------------------------------|-----------------|---------------------------------------------------------------|-------------------------------------------|-------------------------------------------------|--------------------------------------------------------------------------------------------------|
| 101. | Bagante et al <sup>193</sup><br>2015 | Retrospective | Adrenocortical Carcinoma   | US             | 84                                                       | NLR >5    | 51 patients received peri-operative systemic chemotherapy, 38 patients received adjuvant mitotane | 50 (5-year CSS) | N/A                                                           | Multivariate: 2.21 (1.10-4.43)<br>p=0.025 | N/A                                             | Multivariate: AJCC tumour status and metastatic status                                           |
| 102. | Wang et al <sup>194</sup><br>2015    | Retrospective | Hepatocellular Carcinoma   | US             | 234                                                      | NLR >2.5  | 170 patients had antiviral treatment                                                              | N/A             | 88 (5-year survival)                                          | N/A                                       | Multivariate: 4.9 (1.8-13.2)<br>p=0.002         | Multivariate: Tumour size                                                                        |
| 103. | Pine et al <sup>195</sup><br>2015    | Retrospective | Colorectal Cancer          | United Kingdom | 358                                                      | NLR ≥5    | No mention of adjuvant treatment                                                                  | N/A             | 157 (after 4 years)                                           | N/A                                       | Multivariate: 1.819 (1.310-2.526)<br>p<0.001    | Multivariate: Age, Dukes' stage C and stage D                                                    |
| 104. | Li et al <sup>196</sup><br>2015      | Retrospective | Endometria Cancer          | China          | 282                                                      | NLR ≥4.68 | No mention of adjuvant treatment                                                                  | N/A             | 38 (5-year survival)                                          | N/A                                       | Multivariate: 2.298 (0.679-7.781)<br>p=0.181    | Multivariate: CRP, D-dimer,                                                                      |
| 105. | Zhang et al <sup>197</sup><br>2015   | Retrospective | Non-small Cell Lung Cancer | China          | 678                                                      | NLR >2.3  | Adjuvant chemotherapy or/and radiotherapy                                                         | N/A             | 367                                                           | N/A                                       | Multivariate: 1.624 (1.304-2.022)<br>p<0.001    | Multivariate: Pathological stage (I,II,IIIA)                                                     |
| 106. | Zhang et al <sup>198</sup><br>2015   | Retrospective | Gallbladder Carcinoma      | China          | 145                                                      | NLR ≥1.94 | No mention of adjuvant treatment                                                                  | N/A             | 117 (5-year survival)                                         | N/A                                       | Multivariate: RR 2.059 (1.253-3.384)<br>p=0.004 | Multivariate: Nevin stages, operation modes, Hb                                                  |
| 107. | Qu et al <sup>199</sup><br>2015      | Retrospective | Gastric Cancer             | China          | 1397<br>Development set: n=1123<br>Validation set: n=274 | NLR >1.86 | All patients underwent neoadjuvant chemotherapy or adjuvant radiotherapy                          | N/A             | 3-year survival<br>Development set: 307<br>Validation set: 60 | N/A                                       | Multivariate: 1.379 (1.082-1.758)<br>p=0.009    | Multivariate: Age, tumour size, Lauren type, depth of invasion, number of metastatic lymph node. |
| 108. | Zhang et al <sup>200</sup><br>2015   | Retrospective | Ovarian Cancer             | China          | 190                                                      | NLR >3.4) | Surgery was followed by platinum-based chemotherapy                                               | N/A             | 170 (after 100-month)                                         | N/A                                       | Univariate: 2.172 (1.545-3.054)<br>p<0.001      | Multivariate: Stage (FIGO), postoperative residual tumour mass, PLR                              |
| 109. | Yu et al <sup>201</sup><br>2015      | Retrospective | Gastric Cancer             | China          | 291                                                      | NLR <3.5  | No mention of adjuvant treatment                                                                  | N/A             | 199 (5-year survival)                                         | N/A                                       | Multivariate: 0.626 (0.460-0.852)<br>p=0.003    | Multivariate: N staging, TNM staging                                                             |

|      |                                         |               |                                         |        |      |            |                                                                                            |     |                       |                                              |                                                 |                                                                                                                     |
|------|-----------------------------------------|---------------|-----------------------------------------|--------|------|------------|--------------------------------------------------------------------------------------------|-----|-----------------------|----------------------------------------------|-------------------------------------------------|---------------------------------------------------------------------------------------------------------------------|
| 110. | Sun et al <sup>33</sup><br>2015         | Retrospective | Gastric Cancer                          | China  | 632  | NLR. >1.83 | 395 patients received adjuvant chemotherapy                                                | N/A | 448                   | N/A                                          | Multivariate:<br>1.056 (0.830-1.343)<br>p=0.656 | Multivariate:<br>Age, respectability, distant metastasis, pathological stage, CEA, postoperative complications, PNI |
| 111. | Duan et al <sup>202</sup><br>2015       | Retrospective | Esophageal SCC                          | China  | 371  | NLR >3     | No mention of adjuvant treatment                                                           | 192 | N/A                   | Multivariate:<br>1.591 (1.132-2.235) p=0.007 | N/A                                             | Multivariate:<br>pN status                                                                                          |
| 112. | Wen et al <sup>203</sup><br>2015        | Retrospective | Renal Cell Carcinoma                    | China  | 327  | NLR ≥1.7   | No mention of adjuvant treatment                                                           | N/A | 230 (after 80 months) | N/A                                          | Multivariate:<br>1.674 (1.103-2.539)<br>p=0.019 | Multivariate:<br>Histological subtypes, pT stage                                                                    |
| 113. | Zhang et al <sup>16</sup><br>2015       | Retrospective | Non-Small Cell Lung Cancer              | China  | 1238 | NLR >2.3   | Adjuvant treatments including chemotherapy, radiotherapy and concurrent chemoradiotherapy  | N/A | 686                   | N/A                                          | Univariate:<br>1.533 (1.458-1.785)<br>p<0.001   | Multivariate:<br>TNM stage, LDH, D-dimer, COP-NLR                                                                   |
| 114. | Choi et al <sup>204</sup><br>2015       | Retrospective | Colorectal Cancer                       | Canada | 549  | NLR≥2.6    | 147 patients received adjuvant therapy : chemotherapy, radiation or both                   | N/A | 120 (5-year survival) | N/A                                          | Multivariate:<br>1.91 (1.26-2.9) p=0.002        | Multivariate:<br>Age>75, lymph nodes positive, ASA status                                                           |
| 115. | Deng et al <sup>205</sup><br>2015       | Retrospective | Gastric Cancer                          | China  | 389  | NLR≥2.36   | No mention of adjuvant treatment                                                           | 235 | 270                   | Multivariate:<br>1.53 (1.11-2.11)<br>p=0.010 | Multivariate:<br>1.13 (0.68-1.87)<br>p=0.648    | Multivariate:<br>Age, tumour stage, lymph node, distant metastasis, dNLR                                            |
| 116. | Spolverato et al <sup>206</sup><br>2015 | Retrospective | Hepato-Pancreatico-Biliary Malignancies | US     | 452  | NLR ≥5     | 189 patients received neoadjuvant chemotherapy.                                            | N/A | 192 (5-year survival) | N/A                                          | Multivariate:<br>1.94 (1.03-3.64) p=0.040       | Multivariate:<br>Age, complications.                                                                                |
| 117. | Han et al <sup>207</sup><br>2015        | Retrospective | Esophageal SCC                          | China  | 218  | NLR< 2.60  | Adjuvant treatment:<br>17 received chemotherapy<br>41 received radiotherapy<br>24 received | N/A | 138                   | N/A                                          | Multivariate:<br>1.133 (0.762-1.685)<br>p=0.538 | Multivariate:<br>Tumour length, pTNM stage, LMR.                                                                    |

|      |                                     |               |                          |             |      |           |                                                                                                                                              |     |                       |                                            |                                                                                   |                                                                            |
|------|-------------------------------------|---------------|--------------------------|-------------|------|-----------|----------------------------------------------------------------------------------------------------------------------------------------------|-----|-----------------------|--------------------------------------------|-----------------------------------------------------------------------------------|----------------------------------------------------------------------------|
|      |                                     |               |                          |             |      |           | chemoradiotherapy                                                                                                                            |     |                       |                                            |                                                                                   |                                                                            |
| 118. | Kim et al <sup>208</sup><br>2015    | Retrospective | Gastric Cancer           | Korea       | 1986 | NLR>2     | No mention of adjuvant treatment                                                                                                             | N/A | 323 (5-year survival) | N/A                                        | Multivariate:<br>1.403 (1.048-1.879)<br>p=0.0230                                  | Multivariate:<br>Age, approach method, depth of invasion, node status      |
| 119. | Chan et al <sup>209</sup><br>2015   | Retrospective | Hepatocellular Carcinoma | Hong Kong   | 324  | NLR≥5     | 282 patients with chronic viral hepatitis received antiviral therapy                                                                         | N/A | 79 (5-year survival)  | N/A                                        | Univariate:<br>1.587 (0.817-3.086)<br>p=0.173                                     | Multivariate:<br>Antiviral therapy, microvascular invasion, PNI.           |
| 120. | Choi et al <sup>210</sup><br>2015   | Retrospective | Lung Cancer              | US          | 1139 | NLR ≥5    | Neoadjuvant :<br>245 received chemotherapy<br>18 received radiation<br><br>Adjuvant :<br>285 received chemotherapy<br>170 received radiation | N/A | 752 (5-year survival) | N/A                                        | Multivariate:<br>Preoperative NLR<br>1.686 (1.274-2.230)<br>p=0.0003              | Multivariate:<br>Age, stage, adjuvant radiation                            |
| 121. | Lee et al <sup>211</sup><br>2015    | Retrospective | Breast cancer            | South Korea | 3116 | NLR ≥ 5.2 | No mention of adjuvant treatment                                                                                                             | 300 | N/A                   | Univariate:<br>1.09 (0.94-1.26)<br>p=0.516 | N/A                                                                               | Multivariate:<br>Post op NLR 1 week, Nuclear grade, AJCC stage, HR status. |
| 122. | Chen et al <sup>212</sup><br>2015   | Retrospective | Colorectal Cancer        | US          | 274  | NLR >5    | No mention of adjuvant treatment                                                                                                             | N/A | 32 (3-year survival)  | N/A                                        | Univariate:<br>2.37 (1.10-5.10)<br>p=0.023                                        | Multivariate:<br>Metastatic site, LDH                                      |
| 123. | Wuxiao et al <sup>213</sup><br>2015 | Retrospective | Colon Cancer             | China       | 548  | NLR ≤3    | All stage 3 patients received 5-fluorouracil based adjuvant chemotherapy                                                                     | N/A | 106                   | N/A                                        | Multivariate:<br>0.384 (0.255-0.580)<br>p<0.001<br><br>Inverted: 2.60 (1.72-3.92) | Multivariate:<br>RR<br>Histological grade, preoperative CEA levels         |

|      |                                        |               |                                          |             |     |                  |                                                                                                 |     |                       |                                              |                                                   |                                                                                                  |
|------|----------------------------------------|---------------|------------------------------------------|-------------|-----|------------------|-------------------------------------------------------------------------------------------------|-----|-----------------------|----------------------------------------------|---------------------------------------------------|--------------------------------------------------------------------------------------------------|
| 124. | Qing Chen et al <sup>214</sup><br>2015 | Retrospective | Intrahepatic cholangiocarcinoma          | China       | 322 | NLR $\geq 2.49$  | Patients treated with chemoradiotherapy are removed from this study                             | N/A | 204 (5-year survival) | N/A                                          | Multivariate:<br>1.600 (1.178-2.174)<br>$p=0.003$ | Multivariate:<br>CA199, tumour number, lymph node metastasis.                                    |
| 125. | Kim et al <sup>215</sup><br>2015       | Retrospective | Upper Urinary Tract Urothelial Carcinoma | South Korea | 277 | NLR. $\geq 5:1$  | 71 patients received adjuvant chemotherapy                                                      | 73  | 96                    | Univariate:<br>1.179 (0.511-2.718) $p=0.700$ | N/A                                               | Multivariate:<br>Bladder cuff excision, pathologic T stage, lymphovascular invasion, derived NLR |
| 126. | Szkandera et al <sup>216</sup><br>2015 | Retrospective | Soft Tissue Sarcoma                      | Austria     | 340 | dNLR $\geq 2.39$ | No mention of adjuvant treatment                                                                | N/A | 98                    | N/A                                          | Multivariate:<br>1.60 (1.07-2.40) $p=0.022$       | Multivariate:<br>Tumour grade                                                                    |
| 127. | Ben et al <sup>217</sup><br>2015       | Retrospective | Pancreatic Ductal Adenocarcinoma         | China       | 381 | NLR $\geq 2$     | No mention of adjuvant treatment                                                                | N/A | 283                   | N/A                                          | Multivariate:<br>1.51 (1.15-1.99) $p=0.003$       | Multivariate:<br>lymphoid node involvement, poor tumour differentiation, edge-positive.          |
| 128. | Graziosi et al <sup>218</sup><br>2015  | Retrospective | Gastric Cancer                           | Italy       | 156 | NLR. $\geq 2.34$ | 18 patients received neoadjuvant chemotherapy<br><br>70 patients received adjuvant chemotherapy | N/A | 70                    | N/A                                          | Multivariate:<br>1.70 (1.02-2.84) $p<0.043$       | Multivariate:<br>Mixed-type Lauren classification                                                |
| 129. | Takahashi et al <sup>219</sup><br>2015 | Retrospective | Endometrial Cancer                       | Japan       | 508 | NLR $>3$         | 215 patients received adjuvant therapy                                                          | 50  | 55                    | N/A                                          | Univariate:<br>2.47 (1.45-4.24)<br>$p=0.0009$     | Multivariate:<br>Age, FIGO stage, LVSI, neutrophil count                                         |
| 130. | Shirai et al <sup>220</sup><br>2015    | Retrospective | Pancreatic cancer                        | Japan       | 131 | NLR $\geq 5$     | No mention of adjuvant treatment                                                                | N/A | 103 (5-year survival) | N/A                                          | Univariate:<br>0.984 (0.511-1.894)<br>$p=0.961$   | Multivariate:<br>Tumour size, resection margin status, tumour differentiation, PLR               |
| 131. | Chen et al <sup>221</sup><br>2015      | Retrospective | Intrahepatic Cholangiocarcinoma          | China       | 322 | NLR (continuous) | Adjuvant chemoradiotherapy used as well as radiofrequency                                       | N/A | 197 (5-year survival) | N/A                                          | Multivariate:<br>1.399 (1.006-1.947) $p=0.046$    | Multivariate:<br>CA19-9, tumour number, lymph node metastasis,                                   |

|      |                                        |               |                                            |       |      |                 |                                                                                                                                                       |                       |                           |                                                  |                                                  |                                                                                                                                      |
|------|----------------------------------------|---------------|--------------------------------------------|-------|------|-----------------|-------------------------------------------------------------------------------------------------------------------------------------------------------|-----------------------|---------------------------|--------------------------------------------------|--------------------------------------------------|--------------------------------------------------------------------------------------------------------------------------------------|
|      |                                        |               |                                            |       |      |                 | ablation                                                                                                                                              |                       |                           |                                                  |                                                  | PLR                                                                                                                                  |
| 132. | Neal et al <sup>133</sup><br>2015      | Retrospective | Colorectal<br>Liver<br>Metastases          | UK    | 302  | NLR $\geq 5$    | 132 patients had systemic chemotherapy in the 6 months prior to liver resection, 126 patients received systemic chemotherapy following metastasectomy | 204 (5-year survival) | 214 (5-year survival)     | Multivariate:<br>1.927 (1.398-2.655) $p < 0.001$ | Multivariate:<br>1.769 (1.302-2.403) $p < 0.001$ | Multivariate:<br>Clinical risk score                                                                                                 |
| 133. | Kawashima et al <sup>141</sup><br>2015 | Retrospective | Lung<br>Cancer                             | Japan | 1043 | NLR $> 5$       | No mention of adjuvant treatment                                                                                                                      | N/A                   | 227                       | N/A                                              | Univariate:<br>1.53 (1.00-2.34) $p = 0.05$       | Multivariate:<br>Age, smoking, preoperative co-morbidity, CEA, pathological stage, histological tumour type, LVI, surgical procedure |
| 134. | M Cummings et al <sup>19</sup><br>2015 | Retrospective | Endometria<br>l Cancer                     | UK    | 605  | NLR $\geq 2.4$  | 33% of patients received adjuvant radiotherapy, 13% of patients received adjuvant chemotherapy                                                        | 96                    | 166                       | Multivariate:<br>1.68 (1.03-2.76) $p = 0.04$     | Multivariate:<br>1.82 (1.27-2.62) $p = 0.001$    | Multivariate:<br>PLR, combined NLR + PLR, age, FIGO stage, grade, histopathological subtype, LVSI                                    |
| 135. | Lian et al <sup>222</sup><br>2015      | Retrospective | Gastric<br>Cancer                          | China | 162  | NLR $\geq 4.02$ | No mention of adjuvant treatment                                                                                                                      | N/A                   | N/A (expressed in months) | N/A                                              | Univariate:<br>OR 2.58 (1.62-3.80) $p = 0.001$   | Multivariate:<br>Depth of invasion, lymph node metastasis, AJCC stage, PLR                                                           |
| 136. | Okamura et al <sup>107</sup><br>2015   | Retrospective | Hepatocellu<br>lar<br>Carcinoma            | Japan | 256  | NLR $\geq 2.81$ | No mention of adjuvant treatment                                                                                                                      | N/A                   | 86                        | N/A                                              | Multivariate:<br>2.41 (1.44-4.01) $p = 0.001$    | Multivariate:<br>AFP, des-gamma-carboxy prothrombin, low PNI.                                                                        |
| 137. | Xie et al <sup>223</sup><br>2016       | Retrospective | Oesophage<br>al<br>Squamous<br>Cell Cancer | China | 317  | NLR. $> 2.1$    | 76 patients received adjuvant chemotherapy after surgery                                                                                              | 147                   | 152                       | Multivariate:<br>1.196 (0.833-1.719) $p = 0.332$ | N/A                                              | Multivariate:<br>PLR, TNM stage                                                                                                      |

|      |                                        |               |                                   |             |      |                                  |                                                                                                |                      |                       |                                                 |                                                  |                                                                                                   |
|------|----------------------------------------|---------------|-----------------------------------|-------------|------|----------------------------------|------------------------------------------------------------------------------------------------|----------------------|-----------------------|-------------------------------------------------|--------------------------------------------------|---------------------------------------------------------------------------------------------------|
| 138. | Mohri et al <sup>224</sup><br>2016     | Retrospective | Gastric Cancer                    | Japan       | 404  | NLR >3                           | No mention of adjuvant treatment                                                               | 65 (5-year survival) | 82 (5-year survival)  | Multivariate:<br>1.97 (1.08-3.58)<br>p=0.03     | Multivariate:<br>2.09 (1.10-3.94)<br>p=0.02      | Multivariate:<br>Age, gender, ASA, tumour size, p-stage 2 and 3, infectious complication          |
| 139. | Ha et al <sup>25</sup><br>2016         | Retrospective | Ampulla of Vater Cancer           | South Korea | 227  | NLR >1.78                        | Adjuvant treatments including chemotherapy, radiotherapy and concurrent chemoradiotherapy      | N/A                  | 105                   | N/A                                             | Multivariate:<br>1.280 (0.70-2.33)<br>p=0.418    | Multivariate:<br>Vascular invasion, CA19-9.                                                       |
| 140. | Li et al <sup>34</sup><br>2016         | Retrospective | Colorectal Cancer                 | China       | 5336 | NLR ( $\leq 2.72$ vs. $> 2.72$ ) | 5-Fu based adjuvant chemotherapy for stage 2/3 patients                                        | 588                  | 611                   | N/A                                             | Multivariate:<br>1.227 (1.003-1.501)<br>p=0.047  | Multivariate:<br>Age, T stage, N stage, differentiation, venous invasion, LMR, AGR                |
| 141. | Takahashi et al <sup>225</sup><br>2016 | Retrospective | Lung adenocarcinoma               | Japan       | 361  | NLR $\geq 2.5$                   | 80 received adjuvant chemotherapy                                                              | N/A                  | 74 (5-year survival)  | N/A                                             | Multivariate:<br>1.822 (1.133-2.931)<br>p=0.013  | Multivariate:<br>Gender, smoking history, pathological stage, lymphatic/vascular/pleural invasion |
| 142. | Cheng et al <sup>226</sup><br>2016     | Retrospective | Upper Tract Urothelial Carcinoma  | Taiwan      | 195  | NLR $\geq 2.7$                   | 35 patients received adjuvant chemotherapy and 16 patients received adjuvant radiation therapy | N/A                  | 55                    | Multivariate:<br>1.362 (0.652-2.847)<br>p=0.411 | Multivariate:<br>1.611 (0.890-2.916)<br>p=0.115  | Multivariate:<br>WBC, pT stage, tumour grade, RDW                                                 |
| 143. | Turner et al <sup>227</sup><br>2016    | Retrospective | Colon Cancer                      | Australia   | 396  | NLR >5                           | Neoadjuvant chemotherapy was an exclusion criteria                                             | N/A                  | 93                    | N/A                                             | Multivariate:<br>1.75 (0.87-3.52)<br>p=0.039     | Multivariate:<br>Low CIC density, age, ASA score, T4 stage                                        |
| 144. | Fu et al <sup>228</sup><br>2016        | Retrospective | Laryngeal Squamous Cell Carcinoma | China       | 420  | NLR $\geq 2.59$                  | Patients needed to have no previous anti-cancer treatment to be included                       | 171 (5-year CSS)     | 176 (5-year survival) | Multivariate:<br>1.42 (1.06-1.91)<br>p=0.018    | Multivariate:<br>1.31 (1.00-1.71) p=0.046        | Multivariate: Age, drinking, N stage, histological type                                           |
| 145. | Lu et al <sup>229</sup><br>2016        | Retrospective | Hepatocellular carcinoma          | China       | 963  | NLR >2.81                        | No mention of adjuvant treatment                                                               | N/A                  | 553 (5-year survival) | N/A                                             | Multivariate :<br>1.296 (1.074-1.563)<br>p=0.007 | Multivariate :<br>Tumour number, incomplete capsule, serum albumine, ALT, macrovascular           |

|      |                                       |               |                                                      |                |      |                  |                                                                                               |               |                      |                                                  |                                                 |                                                                        |
|------|---------------------------------------|---------------|------------------------------------------------------|----------------|------|------------------|-----------------------------------------------------------------------------------------------|---------------|----------------------|--------------------------------------------------|-------------------------------------------------|------------------------------------------------------------------------|
|      |                                       |               |                                                      |                |      |                  |                                                                                               |               |                      |                                                  |                                                 | invasion                                                               |
| 146. | Chen et al <sup>230</sup><br>2016     | Retrospective | Esophageal Squamous Cell Carcinoma                   | China          | 323  | NLR >3.5         | No mention of adjuvant treatment                                                              | 221 (5-year)  | N/A                  | Multivariate :<br>1.050 (0.740-1.488)<br>p=0.786 | N/A                                             | Multivariate :<br>TNM stage, I stage                                   |
| 147. | Wang et al <sup>231</sup><br>2016     | Retrospective | Gastroesophageal Junction and Gastric Adenocarcinoma | US             | 1498 | NLR (continuous) | Neoadjuvant chemotherapy or radiotherapy                                                      | 588 (5-years) | N/A                  | Multivariate:<br>1.10 (1.05-1.13)<br>p<0.0001    | N/A                                             | Multivariate:<br>T stage, N stage, tumour location                     |
| 148. | Hodek et al <sup>232</sup><br>2016    | Retrospective | Rectal Carcinoma                                     | Czech Republic | 173  | NLR (continuous) | All patients received neoadjuvant chemoradiotherapy                                           | N/A           | 22                   | N/A                                              | Univariate:<br>RR 1.21 (1.03-1.43)<br>p=0.02    | Univariate:<br>WBC, RBC, Hb, platelet count, neutrophils, PLR          |
| 149. | Christina et al <sup>35</sup><br>2016 | Retrospective | Oral cancer                                          | Austria        | 144  | NLR > 1.9        | All patients received neoadjuvant radiotherapy in combination with systemic cytotoxic therapy | N/A           | 60 (5-year survival) | N/A                                              | Univariate:<br>1.16 (0.65-2.06)<br>p=0.62       | Multivariate:<br>Regression grade                                      |
| 150. | Morizawa et al <sup>233</sup><br>2016 | Retrospective | Bladder cancer                                       | Japan          | 110  | NLR ≥2.6         | 37 patients received neoadjuvant chemotherapy                                                 | 32            | 42                   | Multivariate:<br>2.6 (1.9-5.2)<br>p=0.01         | Multivariate:<br>2.8 (1.4-5.4)<br>p=0.00        | Multivariate:<br>ECOG-PS, lymph node metastasis, tumour growth pattern |
| 151. | Ishizuka et al <sup>21</sup><br>2016  | Retrospective | Colorectal Cancer                                    | Japan          | 627  | NLR >2.9         | No mention of adjuvant treatment                                                              | 110           | 142                  | N/A                                              | Multivariate:<br>1.811 (1.229-2.669)<br>p=0.003 | Multivariate:<br>Pathological differentiation, CEA, stage, CAR, GPS    |
| 152. | Kosumi et al <sup>234</sup><br>2016   | Retrospective | Oesophageal Squamous Cell Carcinoma                  | Japan          | 283  | NLR ≥1.94        | 191 patients received adjuvant therapy, 10 patients received neoadjuvant chemoradiotherapy    | 65            | 91                   | Multivariate:<br>1.84 (1.07-3.21)<br>p=0.028     | Multivariate:<br>1.84 (1.17-2.93)<br>p=0.0081   | Multivariate:<br>Nil else                                              |



|      |                                       |               |                                              |           |      |                      |                                                                                                                                                                                                                                |     |                      |                                                  |                                                   |                                                                                                                      |
|------|---------------------------------------|---------------|----------------------------------------------|-----------|------|----------------------|--------------------------------------------------------------------------------------------------------------------------------------------------------------------------------------------------------------------------------|-----|----------------------|--------------------------------------------------|---------------------------------------------------|----------------------------------------------------------------------------------------------------------------------|
| 153. | Kawahara et al <sup>235</sup><br>2016 | Retrospective | Bladder Cancer                               | Japan     | 74   | NLR $\geq$ 2.38      | 10 patients received neoadjuvant chemotherapy, 25 patients received adjuvant chemotherapy                                                                                                                                      | N/A | 29 (after 4000 days) | N/A                                              | Multivariate:<br>4.62 (1.16-18.34)<br>$p=0.030$   | Multivariate:<br>CRP, pathological lymph node metastasis.                                                            |
| 154. | Wang et al <sup>36</sup><br>2016      | Retrospective | Ovarian Cancer                               | China     | 143  | NLR. $>3.43$ )       | No mention of adjuvant treatment                                                                                                                                                                                               | N/A | 51                   | N/A                                              | Multivariate:<br>3.37 (1.39-8.15) $p=0.007$       | Multivariate:<br>Metastasis, prognostic inflammation score                                                           |
| 155. | Kang et al <sup>236</sup><br>2016     | Retrospective | Bladder Cancer                               | Korea     | 385  | Preop-NLR $\geq$ 2.1 | 96 patients received adjuvant chemotherapy                                                                                                                                                                                     | 85  | 116                  | Multivariate:<br>1.16 (1.06-1.28)<br>$p=0.005$   | Multivariate:<br>1.13 (1.04-1.22)<br>$p=0.003$    | Multivariate:<br>Postop-NLR, pT stage, number of lymph nodes removed, lymph node status, age, surgical margin status |
| 156. | Chan et al <sup>112</sup><br>2016     | Retrospective | Colorectal Cancer                            | Australia | 1623 | NLR. $>3.19$ )       | Patients with high-risk stage II and III colon cancer disease were generally offered standard adjuvant chemotherapy, whereas those with stage II or III rectal cancers were usually treated with neoadjuvant chemoradiotherapy | N/A | 941                  | N/A                                              | Univariate:<br>1.830 (1.539-2.176)<br>$p < 0.001$ | Multivariate:<br>Age, T stage, N stage, grade, LMR                                                                   |
| 157. | Toyokawa et al <sup>37</sup><br>2016  | Retrospective | Thoracic Oesophageal Squamous Cell Carcinoma | Japan     | 185  | NLR $>3.612$         | 46 patients received neoadjuvant treatment (39 chemotherapy, 6 chemoradiotherapy, 1 radiotherapy)                                                                                                                              | N/A | 77                   | N/A                                              | Multivariate:<br>1.194 (0.627-2.273)<br>$p=0.589$ | Multivariate:<br>Sex, performance status, ASA, cTNM stage, CONUT score                                               |
| 158. | Bhindi et al <sup>237</sup><br>2016   | Retrospective | Bladder Cancer                               | Canada    | 418  | NLR (per 1-log unit) | 28 received neoadjuvant chemotherapy, 87 received adjuvant                                                                                                                                                                     | 107 | 177                  | Multivariate:<br>1.47 (1.20-1.80)<br>$p < 0.001$ | Multivariate:<br>1.56 (1.16-2.10)<br>$p=0.004$    | Multivariate:<br>T-stage, N-stage, haemoglobin, age, Charlson co-                                                    |

|  |  |  |  |  |  |  |                                                      |  |  |  |  |                                                |
|--|--|--|--|--|--|--|------------------------------------------------------|--|--|--|--|------------------------------------------------|
|  |  |  |  |  |  |  | chemotherapy, 54<br>received salvage<br>chemotherapy |  |  |  |  | morbidity index,<br>lymphovascular<br>invasion |
|--|--|--|--|--|--|--|------------------------------------------------------|--|--|--|--|------------------------------------------------|

Table 3: Studies investigating the prognostic value of PLR in an unselected cohort of patients with operable cancer (Abbreviations: R-status (Resection margin status), ypN (Post neoadjuvant node status))

| No: PLR | Study                                       | Type of Study | Cancer                           | Country  | Patients (n) | Measure of SIR            | Additional Treatment                                                               | Cancer deaths (n) | Overall deaths (n)              | Cancer survival (HR, 95%CI)             | Overall survival (HR, 95%CI)                  | Independent Prognostic Factors                            |
|---------|---------------------------------------------|---------------|----------------------------------|----------|--------------|---------------------------|------------------------------------------------------------------------------------|-------------------|---------------------------------|-----------------------------------------|-----------------------------------------------|-----------------------------------------------------------|
| 1.      | Smith et al <sup>121</sup><br>2009          | Retrospective | Pancreatic Ductal Adenocarcinoma | UK       | 110          | PLR (continuous)          | 33 patients had adjuvant therapy                                                   | N/A               | 93 (48-month survival)          | N/A                                     | Multivariate: 1.004 (1.002-1.006)<br>p=0.0003 | Multivariate: Tumour size, Lymph node ratio               |
| 2.      | Bhatti et al <sup>125</sup><br>2010         | Retrospective | Pancreatic ductal adenocarcinoma | UK       | 84           | PLR ≤100, 100-200, >200   | 30 patients received adjuvant chemotherapy                                         | N/A               | 66 (3-year survival)            | N/A                                     | Univariate: 0.978 (0.899-1.075)<br>0.642      | Multivariate: NLR, Resection margin status                |
| 3.      | Asher et al <sup>134</sup><br>2011          | Retrospective | Ovarian Cancer                   | UK       | 235          | PLR>300                   | 170 patients received chemotherapy                                                 | N/A               | 169 (survival after 150 months) | N/A                                     | Multivariate: 1.698 (1.031-2.797)<br>p=0.03   | Multivariate: Age, stage, residual disease                |
| 4.      | Dutta et al <sup>62</sup><br>2011           | Retrospective | Oesophagus                       | UK       | 112          | PLR (<150/ 150-300/ >300) | 31 had neoadjuvant and 14 adjuvant therapy                                         | 52                | 59                              | Univariate: 0.94 (0.60-1.48)<br>p=0.781 | N/A                                           | Multivariate: mGPS (0/1/2) lymph node ratio (0/≤0.2/>0.2) |
| 5.      | Kwon et al <sup>140</sup><br>2012           | Retrospective | Colorectal cancer                | Korea    | 200          | PLR <150, 150-300, >300   | 150 patients received adjuvant chemotherapy or chemoradiation                      | N/A               | 39                              | N/A                                     | Multivariate: 1.953 (1.161-3.284)<br>p=0.012  | Multivariate: Stage, CEA                                  |
| 6.      | Dutta et al <sup>78</sup><br>2012           | Retrospective | Gastric                          | UK       | 120          | PLR (<150/ 150-300/ >300) | Patients received both adjuvant and neoadjuvant therapy specific figures not given | 44                | 51                              | Univariate: 0.83 (0.49-1.40)<br>p=0.483 | N/A                                           | Multivariate: Positive lymph node ratio, mGPS,            |
| 7.      | Carruthers et al <sup>141</sup><br>2012     | Retrospective | Rectal cancer                    | UK       | 115          | PLR<160                   | Neoadjuvant chemoradiation                                                         | N/A               | 43                              | N/A                                     | Univariate: 1.5 (0.8-2.7)<br>p=0.192          | Multivariate: R status, NLR (<5)                          |
| 8.      | Raungkaewmanee et al <sup>238</sup><br>2012 | Retrospective | Epithelial Ovarian Cancer        | Thailand | 166          | PLR ≥200                  | 145 patients had adjuvant chemotherapy                                             | N/A               | 50                              | N/A                                     | Multivariate: 1.41 (0.77-2.56)<br>p=0.263     | Multivariate: Stage, surgical outcomes                    |

|     |                                        |               |                                     |         |                                               |                           |                                                                                                           |                                        |                                        |                                                                                                               |                                                                                                                     |                                                                             |
|-----|----------------------------------------|---------------|-------------------------------------|---------|-----------------------------------------------|---------------------------|-----------------------------------------------------------------------------------------------------------|----------------------------------------|----------------------------------------|---------------------------------------------------------------------------------------------------------------|---------------------------------------------------------------------------------------------------------------------|-----------------------------------------------------------------------------|
| 9.  | Wang et al <sup>79</sup><br>2012       | Retrospective | Gastric                             | China   | 324                                           | PLR (<150/ 150-300/ >300) | 210 patients had adjuvant chemotherapy                                                                    | N/A                                    | 162                                    | N/A                                                                                                           | Univariate:<br>0.867 (0.665-1.132)<br>p=0.296                                                                       | Multivariate:<br>The 7 <sup>th</sup> TNM stage, Adjuvant chemotherapy , GPS |
| 10. | Feng et al <sup>18</sup><br>2013       | Retrospective | Oesophageal Squamous Cell Carcinoma | China   | 483                                           | PLR >166.5                | No mention of adjuvant or neoadjuvant treatment                                                           | N/A                                    | 244                                    | N/A                                                                                                           | Multivariate:<br>1.751 (1.345-2.280)<br>p<0.001                                                                     | Multivariate:<br>Differentiation, depth of invasion, node metastasis, CNP   |
| 11. | Feng et al <sup>239</sup><br>2013      | Retrospective | Small Cell Carcinoma of Oesophagus  | China   | 43                                            | PLR ≥150                  | 26 patients received adjuvant chemoradiotherapy                                                           | N/A                                    | 35                                     | N/A                                                                                                           | Multivariate:<br>2.272 (1.035-4.984)<br>p=0.041                                                                     | Multivariate:<br>Chemoradiotherapy                                          |
| 12. | Stoz et al <sup>84</sup><br>2013       | Retrospective | Pancreatic Cancer                   | Austria | 110                                           | PLR≥150                   | 88 Underwent chemotherapy                                                                                 | N/A                                    | 110                                    | N/A                                                                                                           | Univariate:<br>1.133 (0.815-1.574)<br>p=0.458                                                                       | Multivariate:<br>Stage at diagnosis, NLR                                    |
| 13. | Toiyama et al <sup>159</sup><br>2013   | Retrospective | Rectal Cancer                       | Japan   | 84                                            | PLR >150                  | All patients received neoadjuvant chemoradiotherapy                                                       | N/A                                    | 37 (after 150 months)                  | N/A                                                                                                           | Univariate:<br>2.17 (0.90-5.21)<br>p=0.08                                                                           | Multivariate:<br>Pathological TNM stage, CRP                                |
| 14. | Son et al <sup>89</sup><br>2013        | Retrospective | Colon Cancer                        | Korea   | 624                                           | PLR>300 vs. <150/ 150-300 | 503 patients received chemotherapy                                                                        | N/A                                    | 55 (5 yr survival)                     | N/A                                                                                                           | Multivariate:<br>2.006 (0.530-7.589)<br>p=0.305                                                                     | Multivariate:<br>Fibrinogen, stage, CEA                                     |
| 15. | Zhang et al <sup>163</sup><br>2014     | Retrospective | Non-Small Cell Lung Cancer          | China   | 400                                           | PLR ≥171                  | Patients treated with neoadjuvant and adjuvant therapy were excluded                                      | 86                                     | 129                                    | N/A                                                                                                           | Univariate:<br>1.985 (1.269-3.104)<br>p=0.003                                                                       | Multivariate:<br>Age, tumour size                                           |
| 16. | Ying et al <sup>164</sup><br>2014      | Retrospective | Colorectal Cancer                   | China   | 205                                           | PLR≥176                   | 77 colon and 31 rectal cancer patients underwent chemotherapy                                             | 100                                    | 112                                    | Multivariate:<br>1.15 (0.75-1.78)<br>p=0.513                                                                  | Multivariate:<br>1.15 (0.77-1.73)<br>p=0.501                                                                        | Multivariate:<br>Grade (G3/G4), chemotherapy                                |
| 17. | Szkandera et al <sup>160</sup><br>2014 | Retrospective | Soft Tissue Sarcoma                 | Austria | 340<br>Training set, n=170<br>Validation set, | PLR ≥200                  | Training set:<br>16 received adjuvant chemotherapy, 102 received adjuvant radiotherapy<br>Validation set: | Training set: 30<br>Validation set: 22 | Training set: 53<br>Validation set: 51 | Univariate:<br>Training set:<br>2.43 (0.99-5.90)<br>p=0.051<br>Validation set:<br>1.52 (0.66-3.54)<br>p=0.320 | Univariate:<br>Training set:<br>3.02 (0.94-9.70)<br>p=0.019<br>Multivariate:<br>Validation set:<br>0.61 (0.30-1.25) | Multivariate:<br>Age, tumour grade, LMR, tumour size                        |

|     |                                          |               |                                            |         |       |                         |                                                                                                                                                 |     |                      |                                              |                                                                                                         |                                                                                                     |
|-----|------------------------------------------|---------------|--------------------------------------------|---------|-------|-------------------------|-------------------------------------------------------------------------------------------------------------------------------------------------|-----|----------------------|----------------------------------------------|---------------------------------------------------------------------------------------------------------|-----------------------------------------------------------------------------------------------------|
|     |                                          |               |                                            |         | n=170 |                         | 22 received adjuvant chemotherapy, 107 received adjuvant radiotherapy                                                                           |     |                      |                                              | p=0.175                                                                                                 |                                                                                                     |
| 18. | Baranyai et al <sup>240</sup><br>2014    | Retrospective | Colorectal Cancer                          | Hungary | 336   | PLR >300                | No mention of adjuvant or neoadjuvant treatment                                                                                                 | N/A | 335                  | N/A                                          | Multivariate:<br>3.5 (2.2-5.6)<br>logrank P=3.6e-08<br>(insignificant)                                  | Multivariate:<br>Elevated platelet count                                                            |
| 19. | Jiang et al <sup>171</sup><br>2014       | Retrospective | Gastric Cancer                             | China   | 377   | PLR ≥184                | 219 patients received adjuvant chemotherapy post gastrectomy                                                                                    | N/A | 223                  | N/A                                          | Multivariate:<br>1.068 (0.791-1.441)<br>p=0.668                                                         | Multivariate:<br>Tumour size,<br>serosal invasion,<br>lymph node metastasis, post complication, NLR |
| 20. | Yuan et al <sup>172</sup><br>2014        | Retrospective | Adenocarcinoma of Esophagogastric Junction | China   | 327   | PLR <150, 150-300, ≥300 | 18 patients received neoadjuvant chemotherapy, 59 patients received adjuvant chemotherapy                                                       | N/A | 185                  | N/A                                          | Univariate:<br>PLR 150-300: 1.284<br>(0.897-1.838) p=0.172<br><br>PLR ≥300: 1.398 (0.872-2.241) p=0.164 | Multivariate:<br>pTNM stage,<br>adjuvant treatment                                                  |
| 21. | Feng et al <sup>174</sup><br>2014        | Retrospective | Esophageal SCC                             | China   | 483   | PLR ≥150                | No mention of adjuvant or neoadjuvant treatment                                                                                                 | N/A | 244                  | N/A                                          | Multivariate:<br>1.840 (1.407-2.407)<br>p<0.001                                                         | Multivariate:<br>Differentiation,<br>depth of invasion,<br>nodal metastasis,<br>NLR                 |
| 22. | Sun et al <sup>96</sup><br>2014          | Retrospective | Colon cancer                               | China   | 255   | PLR<150, 150-300, >300  | No specific mention of neoadjuvant or adjuvant treatment                                                                                        | N/A | 94                   | N/A                                          | Multivariate:<br>RR 0.825 (0.560-1.215)<br>p=0.330                                                      | Multivariate:<br>AFP,<br>CEA,fibrinogen,<br>TNM, mGPS                                               |
| 23. | Neofytou et al <sup>180</sup><br>2014    | Retrospective | Liver-only Colorectal Metastases           | UK      | 140   | PLR >150                | All patients received neoadjuvant chemotherapy                                                                                                  | N/A | 59 (5-year survival) | N/A                                          | Multivariate:<br>2.17 (1.09-4.32)<br>p=0.027                                                            | Multivariate:<br>No adjuvant chemotherapy                                                           |
| 24. | Krenn-Pilko et al <sup>241</sup><br>2014 | Retrospective | Breast cancer                              | Austria | 793   | PLR ≥292                | 712 patients received adjuvant radiotherapy, 93 received adjuvant chemotherapy, 378 received adjuvant hormonal treatment, and 202 received both | 136 | 136                  | Multivariate:<br>2.03 (1.03-4.02)<br>p=0.042 | Multivariate:<br>1.92 (1.01-3.67)<br>p=0.047                                                            | Multivariate:<br>Tumour stage,<br>lymph node involvement                                            |

|     |                                        |               |                     |                |     |                                              |                                                                                        |     |                       |     |                                                                                                   |                                                                                                                  |
|-----|----------------------------------------|---------------|---------------------|----------------|-----|----------------------------------------------|----------------------------------------------------------------------------------------|-----|-----------------------|-----|---------------------------------------------------------------------------------------------------|------------------------------------------------------------------------------------------------------------------|
|     |                                        |               |                     |                |     |                                              | adjuvant chemotherapy and hormonal therapy.                                            |     |                       |     |                                                                                                   |                                                                                                                  |
| 25. | Szkandera et al <sup>242</sup><br>2014 | Retrospective | Colon Cancer        | Austria        | 372 | PLR >225                                     | No specific mention of neoadjuvant or adjuvant treatment                               | N/A | 91                    | N/A | Multivariate:<br>1.49 (0.92-2.40)<br>p=0.107                                                      | Multivariate:<br>Nil else                                                                                        |
| 26. | Pinato et al <sup>91</sup><br>2014     | Retrospective | Lung                | United Kingdom | 220 | PLR >300                                     | Adjuvant radio and chemotherapy administered                                           | N/A | 61                    | N/A | Univariate:<br>1.6 (0.6–5.6) p=0.32                                                               | Multivariate:<br>TNM I/II/III,<br>Pleural Effusion,<br>NLR                                                       |
| 27. | Aurello et al <sup>32</sup><br>2014    | Retrospective | Gastric Cancer      | Italy          | 102 | PLR <150, 150-300, >300 (0,1,2 respectively) | 68 patients received adjuvant chemotherapy after surgery                               | 62  | 62                    | N/A | Multivariate:<br>PLR 1:<br>0.43 (0.10-1.73)<br>p=0.23<br><br>PLR 2:<br>1.13 (0.45-2.79)<br>p=0.79 | Multivariate:<br>Prognostic index,<br>mGPS                                                                       |
| 28. | Que et al <sup>185</sup><br>2015       | Retrospective | Soft-tissue Sarcoma | China          | 222 | PLR ≥133.915                                 | 39 patients received adjuvant chemotherapy, 65 patients received adjuvant radiotherapy | N/A | 82 (after 150 months) | N/A | Multivariate:<br>2.60 (1.17-5.74)<br>p=0.019                                                      | Multivariate:<br>Tumour site:<br>Trunk &<br>extremity, AJCC<br>stage, PLR                                        |
| 29. | Hsu et al <sup>186</sup><br>2015       | Retrospective | Gastric Cancer      | Taiwan         | 989 | PLR >132                                     | 499 patients with stage 2 to 4 tumour received chemotherapy                            | N/A | 395 (5-year survival) | N/A | Multivariate:<br>0.898 (0.696-1.159)<br>p=0.41                                                    | Multivariate:<br>NLR, resection<br>margins,<br>differentiation, T<br>status, N status,<br>LN ratio, M1<br>status |
| 30. | Sheng Han et al <sup>188</sup><br>2015 | Retrospective | Glioblastoma        | China          | 152 | PLR >135                                     | All patients received adjuvant radio-chemotherapy                                      | N/A | 118 (2-year survival) | N/A | Multivariate:<br>1.003 (0.999-1.007)<br>p=0.152                                                   | Multivariate:<br>KPS, MGMT<br>promoter, pre-<br>treatment NLR                                                    |
| 31. | Aldemir et al <sup>190</sup><br>2015   | Retrospective | Gastric Cancer      | Turkey         | 53  | PLR <170 vs. ≥170                            | No mention of adjuvant treatment                                                       | N/A | 19                    | N/A | Univariate:<br>p=0.55                                                                             | Univariate:<br>ECOG<br>performance<br>status, platelet<br>count                                                  |

|     |                                      |               |                            |       |                                                                |             |                                                                                                   |                 |                                                               |                                            |                                                  |                                                                                                         |
|-----|--------------------------------------|---------------|----------------------------|-------|----------------------------------------------------------------|-------------|---------------------------------------------------------------------------------------------------|-----------------|---------------------------------------------------------------|--------------------------------------------|--------------------------------------------------|---------------------------------------------------------------------------------------------------------|
| 32. | Bagante et al <sup>193</sup><br>2015 | Retrospective | Adrenocortical Carcinoma   | US    | 84                                                             | PLR >190    | 51 patients received peri-operative systemic chemotherapy, 38 patients received adjuvant mitotane | 50 (5-year DSS) | N/A                                                           | Univariate:<br>0.90 (0.47-1.73)<br>p=0.757 | N/A                                              | Multivariate:<br>AJCC tumor site, T stage III-IV, Metastasis, NLR                                       |
| 33. | Wang et al <sup>194</sup><br>2015    | Retrospective | HCC                        | US    | 234                                                            | PLR >118.5  | 170 patients had antiviral treatment                                                              | N/A             | 88 (5-year survival)                                          | N/A                                        | Multivariate:<br>1.6 (0.6-4.3)<br>p=0.3          | Multivariate:<br>Tumour size, NLR                                                                       |
| 34. | Li et al <sup>196</sup><br>2015      | Retrospective | Endometrial Cancer         | China | 282                                                            | PLR ≥250    | No specific mention of neoadjuvant or adjuvant treatment                                          | N/A             | 38 (5-year survival)                                          | N/A                                        | Multivariate:<br>0.993 (0.294-3.357)<br>p=0.991  | Multivariate:<br>CRP, D-dimer,                                                                          |
| 35. | Zhang et al <sup>197</sup><br>2015   | Retrospective | Non-small Cell Lung Cancer | China | 678                                                            | PLR >106    | Adjuvant chemotherapy or/and radiotherapy                                                         | N/A             | 367                                                           | N/A                                        | Multivariate:<br>0.966 (0.761-1.228)<br>p=0.780  | Multivariate:<br>Pathological stage (I,II,IIIA), NLR                                                    |
| 36. | Zhang et al <sup>198</sup><br>2015   | Retrospective | Gallbladder Carcinoma      | China | 145                                                            | PLR ≥113.34 | No specific mention of neoadjuvant or adjuvant treatment                                          | N/A             | 117 (5-year survival)                                         | N/A                                        | Univariate:<br>RR 1.903 (1.309-2.767)<br>p=0.001 | Multivariate:<br>Nevin stages, operation modes, Hb, NLR                                                 |
| 37. | Qu et al <sup>199</sup><br>2015      | Retrospective | Gastric Cancer             | China | 1397<br>Development set:<br>n=1123<br>Validation set:<br>n=274 | PLR. >168   | No specific mention of neoadjuvant or adjuvant treatment                                          | N/A             | 3-year survival<br>Development set: 307<br>Validation set: 60 | N/A                                        | Univariate:<br>1.762 (1.372-2.264)<br>p<0.001    | Multivariate:<br>Age, tumour size, Lauren type, depth of invasion, number of metastatic lymph node, NLR |
| 38. | Zhang et al <sup>200</sup><br>2015   | Retrospective | Ovarian Cancer             | China | 190                                                            | PLR >203    | Surgery was followed by platinum-based chemotherapy                                               | N/A             | 170 (after 100-month)                                         | N/A                                        | Multivariate:<br>2.158 (1.468-3.171)<br>p<0.001  | Multivariate:<br>Stage (FIGO), postoperative residual tumour mass                                       |
| 39. | Zhang et al <sup>243</sup><br>2015   | Retrospective | Bladder cancer             | China | 124                                                            | PLR ≥140    | No mention of adjuvant treatment                                                                  | N/A             | 55 (5-year survival)                                          | N/A                                        | Multivariate:<br>1.161(0.605-2.226)<br>p=0.654   | Multivariate:<br>Diabetes, T staging, distant metastasis, LMR                                           |

|     |                                         |               |                                          |             |      |                         |                                                                                                              |     |                       |                                                   |                                                  |                                                                                                                     |
|-----|-----------------------------------------|---------------|------------------------------------------|-------------|------|-------------------------|--------------------------------------------------------------------------------------------------------------|-----|-----------------------|---------------------------------------------------|--------------------------------------------------|---------------------------------------------------------------------------------------------------------------------|
| 40. | Sun et al <sup>33</sup><br>2015         | Retrospective | Gastric Cancer                           | China       | 632  | PLR >140                | 395 patients received adjuvant chemotherapy                                                                  | N/A | 448                   | N/A                                               | Multivariate:<br>1.190 (0.960-1.475)<br>p=0.113  | Multivariate:<br>Age, respectability, distant metastasis, pathological stage, CEA, postoperative complications, PNI |
| 41. | Choi et al <sup>204</sup><br>2015       | Retrospective | Colorectal Cancer                        | Canada      | 549  | PLR≥295                 | 147 patients received adjuvant therapy : chemotherapy, radiation or both                                     | N/A | 120 (5-year survival) | N/A                                               | Univariate:<br>1.81 (1.06-3.06) p=0.028          | Multivariate:<br>Age>75, lymph nodes positive, ASA status, NLR                                                      |
| 42. | Deng et a <sup>205</sup><br>2015        | Retrospective | Gastric Cancer                           | China       | 389  | PLR≥132                 | No mention of adjuvant treatment                                                                             | 235 | 270                   | Multivariate:<br>0.96 (0.71-1.28)<br>p=0.763      | Multivariate:<br>1.03 (0.78-1.35) p=0.858        | Multivariate:<br>Age, tumour stage, lymph node, distant metastasis, dNLR                                            |
| 43. | Spolverato et al <sup>206</sup><br>2015 | Retrospective | Hepato-Pancreatico-Biliary Malignancies  | US          | 452  | PLR ≥190                | 189 patients received neoadjuvant chemotherapy.                                                              | N/A | 192 (5-year survival) | N/A                                               | Multivariate:<br>1.79 (1.05-3.04) p=0.032        | Multivariate:<br>Age, complications, NLR                                                                            |
| 44. | Han et al <sup>207</sup><br>2015        | Retrospective | Esophageal SCC                           | China       | 218  | PLR<244                 | Adjuvant treatment:<br>17 received chemotherapy<br>41 received radiotherapy<br>24 received chemoradiotherapy | N/A | 138                   | N/A                                               | Multivariate:<br>1.014 (0.582-1.769)<br>p=0.96   | Multivariate:<br>Tumour length, pTNM stage, LMR.                                                                    |
| 45. | Kim et al <sup>208</sup><br>2015        | Retrospective | Gastric Cancer                           | Korea       | 1986 | PLR>126                 | No mention of adjuvant treatment                                                                             | N/A | 323 (5-year survival) | N/A                                               | Multivariate:<br>1.035 (0.805-1.330)<br>p=0.7888 | Multivariate:<br>Age, approach method, depth of invasion, node status, NLR                                          |
| 46. | Anthony et al <sup>209</sup><br>2015    | Retrospective | Hepatocellular Carcinoma                 | Hong Kong   | 324  | PLR≥150                 | 282 patients with chronic viral hepatitis received antiviral therapy                                         | N/A | 79 (5-year survival)  | N/A                                               | Univariate:<br>1.229 (0.756-1.998)<br>p=0.405    | Multivariate:<br>Antiviral therapy, microvascular invasion, PNI.                                                    |
| 47. | Kim et al <sup>215</sup><br>2015        | Retrospective | Upper Urinary Tract Urothelial Carcinoma | South Korea | 277  | PLR <150, 150-300, >300 | 71 patients received adjuvant chemotherapy                                                                   | 73  | 96                    | Univariate: PLR<br>150-300 1.460<br>(0.887-2.405) | N/A                                              | Multivariate:<br>Bladder cuff excision, pathologic T stage,                                                         |



|     |                                        |               |                                              |       |     |                              |                                                                                                                                                                                   |                          |                          |                                                       |                                                 |                                                                                        |
|-----|----------------------------------------|---------------|----------------------------------------------|-------|-----|------------------------------|-----------------------------------------------------------------------------------------------------------------------------------------------------------------------------------|--------------------------|--------------------------|-------------------------------------------------------|-------------------------------------------------|----------------------------------------------------------------------------------------|
|     |                                        |               |                                              |       |     |                              |                                                                                                                                                                                   |                          |                          | p=0.137<br>PLR >300 1.202<br>(0.374-3.864)<br>p=0.757 |                                                 | lymphovascular<br>invasion, derived<br>NLR                                             |
| 48. | Neofytou et al <sup>192</sup><br>2015  | Retrospective | Liver-Only<br>Colorectal<br>Metastases       | UK    | 140 | PLR (continuous<br>variable) | All patients received<br>neoadjuvant<br>chemotherapy, 104<br>received adjuvant<br>chemotherapy.                                                                                   | 60                       | 63                       | Univariate:<br>1.006 (1.002-<br>1.009)<br>p<0.001     | N/A                                             | Multivariate:<br>Adjuvant<br>chemotherapy,<br>neoadjuvant LMR.                         |
| 49. | Messenger et al <sup>244</sup><br>2015 | Retrospective | Oeophageal<br>and<br>junctional<br>carcinoma | UK    | 153 | PLR >192                     | 36.6% of patients<br>received adjuvant<br>chemotherapy after<br>surgery                                                                                                           | N/A                      | 39                       | N/A                                                   | Multivariate:<br>2.47 (1.21-5.01)<br>p=0.012    | Multivariate:<br>Differentiation,<br>resection margin,<br>ypN                          |
| 50. | Pang et al <sup>245</sup><br>2015      | Retrospective | Gallbladder<br>carcinoma                     | China | 316 | PLR ≥ 117.7                  | No mention of<br>adjuvant or<br>neoadjuvant<br>treatment                                                                                                                          | N/A                      | 254                      | N/A                                                   | Multivariate:<br>2.021 (1.243-3.278)<br>p=0.005 | Multivariate:<br>CA-125, CA-<br>199,TNM                                                |
| 51. | Ozawa et al <sup>246</sup><br>2015     | Retrospective | Colorectal<br>Cancer                         | Japan | 234 | PLR ≥25.4                    | 15 patients excluded<br>as underwent<br>adjuvant<br>chemotherapy                                                                                                                  | 222                      | 211                      | Multivariate:<br>3.61 (1.08-12.64)<br>p=0.038         | N/A                                             | Multivariate:<br>Nil else                                                              |
| 52. | Shirai et al <sup>220</sup><br>2015    | Retrospective | Pancreatic<br>cancer                         | Japan | 131 | PLR ≥150                     | No mention of<br>adjuvant treatment                                                                                                                                               | N/A                      | 103 (5-year<br>survival) | N/A                                                   | Multivariate:<br>1.688 (1.045-2.726)<br>p=0.032 | Multivariate:<br>Tumour size,<br>resection margin<br>status, tumour<br>differentiation |
| 53. | Chen et al <sup>221</sup><br>2015      | Retrospective | Intrahepatic<br>Cholangioc<br>arcinoma       | China | 322 | PLR ≥123                     | Adjuvant<br>chemoradiotherapy<br>used as well as<br>radiofrequency<br>ablation                                                                                                    | N/A                      | 197 (5-year<br>survival) | N/A                                                   | Multivariate:<br>1.410 (1.026-1.938)<br>p=0.034 | Multivariate:<br>CA19-9, tumour<br>number, lymph<br>node metastasis,<br>NLR            |
| 54. | Neal et al <sup>17</sup><br>2015       | Retrospective | Colorectal<br>Liver<br>Metastases            | UK    | 302 | PLR <150, 150-<br>300, >300  | 132 patients had<br>systemic<br>chemotherapy in<br>the 6 months prior<br>to liver resection,<br>126 patients<br>received systemic<br>chemotherapy<br>following<br>metastastectomy | 204 (5-year<br>survival) | 214 (5-year<br>survival) | Univariate:<br>1.244 (1.003-<br>1.542) p=0.047        | Univariate:<br>1.244 (1.015-1.525)<br>p=0.036   | Multivariate:<br>Clinical risk score,<br>NLR≥3                                         |

|     |                                       |               |                                  |        |      |                   |                                                                                                                                                                                         |     |                           |                                                 |                                                 |                                                                                                                                     |
|-----|---------------------------------------|---------------|----------------------------------|--------|------|-------------------|-----------------------------------------------------------------------------------------------------------------------------------------------------------------------------------------|-----|---------------------------|-------------------------------------------------|-------------------------------------------------|-------------------------------------------------------------------------------------------------------------------------------------|
| 55. | Xu et al <sup>22</sup><br>2015        | Retrospective | Oesophageal SCC                  | China  | 468  | PLR>147           | 196 patient received adjuvant chemo and radiotherapy                                                                                                                                    | N/A | 259                       | N/A                                             | Univariate:<br>1.12 (0.87-1.43) p=0.39          | Multivariate:<br>Lymph Node Mets,<br>Venous/lymphatic invasion, CRP/Alb Ratio                                                       |
| 56. | Kawashima et al <sup>41</sup><br>2015 | Retrospective | Lung Cancer                      | Japan  | 1043 | PLR >300          | No mention of adjuvant treatment                                                                                                                                                        | N/A | 227                       | N/A                                             | Univariate:<br>2.35 (1.45-3.82)<br>p<0.01       | Multivariate:<br>Age, smoking, neoadjuvant co-morbidity, CEA, pathological stage, histological tumour type, LVI, surgical procedure |
| 57. | Cummings et al <sup>19</sup><br>2015  | Retrospective | Endometrial Cancer               | UK     | 605  | PLR. ≥240         | 33% of patients received adjuvant radiotherapy, 13% of patients received adjuvant chemotherapy                                                                                          | 96  | 166                       | Multivariate:<br>1.76 (1.09-2.87)<br>p=0.022    | Multivariate:<br>1.89 (1.30-2.75)<br>p=0.001    | Multivariate:<br>NLR, Combined NLR + PLR, age, FIGO stage, grade, histopathological subtype, LVSI                                   |
| 58. | Lian et al <sup>222</sup><br>2015     | Retrospective | Gastric Cancer                   | China  | 162  | PLR ≥208          | No mention of adjuvant treatment                                                                                                                                                        | N/A | N/A (expressed in months) | N/A                                             | Multivariate:<br>OR 2.55 (1.37-3.84)<br>p=0.001 | Multivariate:<br>Depth of invasion, lymph node metastasis, AJCC stage                                                               |
| 59. | Saito et al <sup>247</sup><br>2016    | Retrospective | Perihilar cholangiocarcinoma     | Japan  | 115  | PLR >150          | 1 patient received neoadjuvant chemotherapy, 1 patient received neoadjuvant radiation, 1 patient received neoadjuvant chemotherapy and radiation, 21 patients received adjuvant therapy | N/A | 59 (5-year survival)      | Multivariate:<br>2.207 (1.200-4.060) p=0.011    | N/A                                             | Multivariate:<br>Preoperative factors (CEA, albumin, CRP), N category, portal vein invasion, surgical margin                        |
| 60. | Xie et al <sup>223</sup><br>2016      | Retrospective | Oesophageal Squamous Cell Cancer | China  | 317  | PLR >103          | 76 patients received adjuvant chemotherapy                                                                                                                                              | 147 | 152                       | Multivariate:<br>1.776 (1.224-2.578)<br>p=0.003 | N/A                                             | Multivariate:<br>TNM stage                                                                                                          |
| 61. | Bhindi et al <sup>237</sup><br>2016   | Retrospective | Bladder Cancer                   | Canada | 418  | PLR per 100 units | 28 received neo-adjuvant chemotherapy, 87 received adjuvant chemotherapy, 54                                                                                                            | 107 | 177                       | Univariate:<br>1.21 (1.05-1.41)<br>p=0.01       | Univariate:<br>1.16 (1.02-1.33)<br>p=0.03       | Multivariate:<br>T-stage, N-stage, haemoglobin, NLR, age, Charlson co-morbidity                                                     |

|     |                                    |               |                                    |                |      |                  |                                                                                           |              |     |                                               |                                                 |                                                                                                                                                                                                                            |
|-----|------------------------------------|---------------|------------------------------------|----------------|------|------------------|-------------------------------------------------------------------------------------------|--------------|-----|-----------------------------------------------|-------------------------------------------------|----------------------------------------------------------------------------------------------------------------------------------------------------------------------------------------------------------------------------|
|     |                                    |               |                                    |                |      |                  | received salvage chemotherapy                                                             |              |     |                                               |                                                 | index, lymphovascular invasion                                                                                                                                                                                             |
| 62. | Ha et al <sup>25</sup><br>2016     | Retrospective | Ampulla of Vater Cancer            | South Korea    | 227  | PLR >192         | Adjuvant treatments including chemotherapy, radiotherapy and concurrent chemoradiotherapy | N/A          | 105 | N/A                                           | Multivariate:<br>0.686 (0.35-1.34)<br>p=0.268   | Multivariate:<br>Vascular invasion, CA19-9.                                                                                                                                                                                |
| 63. | Li et al <sup>34</sup><br>2016     | Retrospective | Colorectal Cancer                  | China          | 5336 | PLR >219         | 5-Fu based adjuvant chemotherapy for stage 2/3 patients                                   | 588          | 611 | N/A                                           | Multivariate:<br>1.175 (0.946-1.460)<br>p=0.144 | Multivariate:<br>Age, T stage, N stage, differentiation, venous invasion, NLR, LMR, AGR                                                                                                                                    |
| 64. | Chen et al <sup>230</sup><br>2016  | Retrospective | Esophageal Squamous Cell Carcinoma | China          | 323  | PLR >150         | No mention of adjuvant treatment                                                          | 221 (5-year) | N/A | Multivariate :<br>1.440 (0.978-2.121) p=0.064 | N/A                                             | TNM stage, I stage                                                                                                                                                                                                         |
| 65. | Hodek et al <sup>232</sup><br>2016 | Retrospective | Rectal Carcinoma                   | Czech Republic | 173  | PLR (continuous) | All patients received neoadjuvant chemoradiotherapy                                       | N/A          | 22  | N/A                                           | Univariate:<br>RR : 1.01 (1.00-1.01)<br>p=0.02  | Univariate:<br>Clinical T stage, circular vs semi-circular, stenotizing tumour, LVSI, angioinvasion, perineural invasion, R0 resection, positive lymph nodes, tumour stage, WBC, RBC, Hb, platelet count, neutrophils, NLR |
| 66. | Wang et al <sup>36</sup><br>2016   | Retrospective | Ovarian Cancer                     | China          | 143  | PLR >201         | No mention of adjuvant treatment                                                          | N/A          | 51  | N/A                                           | Univariate:<br>1.76 (1.02-3.06) p=0.043         | Multivariate:<br>Metastasis, prognostic inflammation score                                                                                                                                                                 |

|     |                                       |               |                                              |           |      |          |                                                                                                                                                                     |     |     |     |                                                 |                                                                        |
|-----|---------------------------------------|---------------|----------------------------------------------|-----------|------|----------|---------------------------------------------------------------------------------------------------------------------------------------------------------------------|-----|-----|-----|-------------------------------------------------|------------------------------------------------------------------------|
| 67. | Chan et al <sup>112</sup><br>2016     | Retrospective | Colorectal Cancer                            | Australia | 1623 | PLR >258 | Patients with high-risk stage II and III colon cancer disease received adjuvant chemotherapy. Stage II or III rectal cancers received neoadjuvant chemoradiotherapy | N/A | 941 | N/A | Univariate:<br>1.592 (1.343-1.886)<br>p< 0.001  | Multivariate:<br>Age, T stage, N stage, grade, LMR                     |
| 68. | Toyokawa et al <sup>202</sup><br>2016 | Retrospective | Thoracic Oesophageal Squamous Cell Carcinoma | Japan     | 185  | PLR >193 | 46 patients received neoadjuvant treatment (39 chemotherapy, 6 chemoradiotherapy, 1 radiotherapy)                                                                   | N/A | 77  | N/A | Multivariate:<br>1.213 (0.696-2.115)<br>p=0.496 | Multivariate:<br>Sex, performance status, ASA, cTNM stage, CONUT score |

Table 4: Studies investigating the prognostic value of LMR in an unselected cohort of patients with operable cancer (Abbreviations: HER-2 (Herceptin 2 receptor))

| No: LMR | Study                                  | Type of Study | Cancer                          | Country | Patients (n)                                        | Measure of SIR  | Additional Treatment                                                                                                                                                                   | Cancer deaths (n)                      | Overall deaths (n)                     | Cancer survival (HR, 95%CI)                                                                                             | Overall survival (HR, 95%CI)                                                                                            | Independent Prognostic Factors                                                        |
|---------|----------------------------------------|---------------|---------------------------------|---------|-----------------------------------------------------|-----------------|----------------------------------------------------------------------------------------------------------------------------------------------------------------------------------------|----------------------------------------|----------------------------------------|-------------------------------------------------------------------------------------------------------------------------|-------------------------------------------------------------------------------------------------------------------------|---------------------------------------------------------------------------------------|
| 1.      | Stotz et al <sup>248</sup><br>2013     | Retrospective | Colon Cancer                    | Austria | 372                                                 | LMR $\geq$ 2.14 | 230 patients received adjuvant chemotherapy                                                                                                                                            | N/A                                    | 72                                     | N/A                                                                                                                     | Multivariate:<br>0.51 (0.31-0.83)<br>$p=0.007$                                                                          | Multivariate:<br>Tumour invasion depth, lymph node involvement, tumour stage          |
| 2.      | Szkandera et al <sup>160</sup><br>2014 | Retrospective | Soft Tissue Sarcoma             | Austria | 340<br>Training set, n=170<br>Validation set, n=170 | LMR $\geq$ 2.85 | Training set:<br>16 received adjuvant chemotherapy, 102 received adjuvant radiotherapy<br><br>Validation set:<br>22 received adjuvant chemotherapy, 107 received adjuvant radiotherapy | Training set: 30<br>Validation set: 22 | Training set: 53<br>Validation set: 51 | Multivariate:<br>Training set:<br>0.41 (0.18-0.97)<br>$p=0.043$<br><br>Validation set:<br>0.33 (0.12-0.90)<br>$p=0.030$ | Multivariate:<br>Training set:<br>0.72 (0.34-1.52)<br>$p=0.390$<br><br>Validation set:<br>0.35 (0.17-0.75)<br>$p=0.007$ | Multivariate:<br>Age, tumour grade, LMR, tumour size                                  |
| 3.      | Hu et al <sup>249</sup><br>2014        | Retrospective | Lung Cancer                     | China   | 1453                                                | LMR $\leq$ 3.68 | No mention of adjuvant treatment                                                                                                                                                       | N/A                                    | 509                                    | N/A                                                                                                                     | Multivariate:<br>1.510 (1.265-1.803)<br>$p<0.001$                                                                       | Multivariate:<br>Age, TNM stage                                                       |
| 4.      | Zhou et al <sup>250</sup><br>2014      | Retrospective | Gastric Cancer                  | China   | 426                                                 | LMR $\geq$ 4.32 | 306 patients received adjuvant chemotherapy                                                                                                                                            | N/A                                    | 250                                    | N/A                                                                                                                     | Multivariate:<br>0.688 (0.521-0.908)<br>$p=0.008$                                                                       | Multivariate:<br>Size, vascular/ nerve infiltration, TNM stage, adjuvant chemotherapy |
| 5.      | Hutterer et al <sup>251</sup><br>2014  | Retrospective | Clear Cell Renal Cell Carcinoma | Austria | 678                                                 | LMR $<$ 3       | No mention of adjuvant treatment                                                                                                                                                       | 68                                     | 123                                    | Multivariate:<br>2.332 (1.100-4.942) $p=0.027$                                                                          | Multivariate:<br>1.373 (0.929-2.031)<br>$p=0.112$                                                                       | Multivariate:<br>Age, pathologic T category, tumour grade, tumour necrosis            |
| 6.      | Zhang et al <sup>243</sup><br>2015     | Retrospective | Bladder cancer                  | China   | 124                                                 | LMR $\geq$ 4    | No mention of adjuvant treatment                                                                                                                                                       | N/A                                    | 55 (5-year survival)                   | N/A                                                                                                                     | Multivariate:<br>0.674 (0.412-0.890)<br>$p=0.003$                                                                       | Multivariate:<br>Diabetes, T staging, distant metastasis, PLR                         |

|     |                                       |               |                                        |       |      |                                          |                                                                                                                                                                                  |                          |                          |                                                |                                                 |                                                                                                                           |
|-----|---------------------------------------|---------------|----------------------------------------|-------|------|------------------------------------------|----------------------------------------------------------------------------------------------------------------------------------------------------------------------------------|--------------------------|--------------------------|------------------------------------------------|-------------------------------------------------|---------------------------------------------------------------------------------------------------------------------------|
| 7.  | Han et al <sup>207</sup><br>2015      | Retrospective | Esophageal<br>SCC                      | China | 218  | LMR<2.57                                 | Adjuvant<br>treatment:<br>17 received<br>chemotherapy<br><br>41 received<br>radiotherapy<br><br>24 received<br>chemoradiotherapy                                                 | N/A                      | 138                      | N/A                                            | Multivariate:<br>1.759 (1.201-2.576)<br>p=0.004 | Multivariate:<br>Tumour length,<br>pTNM stage.                                                                            |
| 8.  | Deng et al <sup>205</sup><br>2015     | Retrospective | Gastric<br>Cancer                      | China | 389  | LMR≥4.95                                 | No mention of<br>adjuvant treatment                                                                                                                                              | 235                      | 270                      | Multivariate:<br>1.00 (0.71-1.40)<br>p=0.995   | Multivariate: 1.00<br>(0.73-1.35) p=0.977       | Multivariate:<br>Age, tumour<br>stage, lymph<br>node, distant<br>metastasis, dNLR                                         |
| 9.  | Neofytou et al <sup>192</sup><br>2015 | Retrospective | Liver-Only<br>Colorectal<br>Metastases | UK    | 140  | Preoperative<br>LMR ≤3                   | All patients received<br>neoadjuvant<br>chemotherapy, 104<br>received adjuvant<br>chemotherapy.                                                                                  | 60                       | 63                       | Multivariate:<br>2.15 (1.13-4.10)<br>p=0.020   | Multivariate:<br>2.43 (1.32-4.48)<br>p=0.004    | Multivariate:<br>Adjuvant<br>chemotherapy,<br>preoperative                                                                |
| 10. | Neal et al <sup>17</sup><br>2015      | Retrospective | Colorectal<br>Liver<br>Metastases      | UK    | 302  | LMR >2.35                                | 132 patients had<br>systemic<br>chemotherapy in<br>the 6 months prior<br>to liver resection,<br>126 patients<br>received systemic<br>chemotherapy<br>following<br>metastasectomy | 204 (5-year<br>survival) | 214 (5-year<br>survival) | Univariate:<br>0.624 (0.455-<br>0.855) p=0.003 | Univariate:<br>0.638 (0.473-0.860)<br>p=0.003   | Multivariate:<br>Clinical risk score                                                                                      |
| 11. | Wen et al <sup>252</sup><br>2015      | Retrospective | Breast<br>Cancer                       | China | 2000 | LMR cut-off<br>3.80 (low or<br>high-LMR) | No mention of<br>adjuvant therapy<br>but likely triple<br>negative cancers<br>had chemo                                                                                          | N/A                      | 326                      | N/A                                            | Multivariate:<br>0.840 (0.629-1.121)<br>p=0.236 | Multivariate:<br>Menstrual status,<br>tumour size,<br>lymph node status<br>ER,HER-2,<br>monocyte count                    |
| 12. | Lin et al <sup>253</sup><br>2015      | Retrospective | HCC                                    | China | 210  | LMR >3.23                                | Antiviral therapy for<br>all patients after<br>surgery                                                                                                                           | 47                       | 48                       | N/A                                            | Multivariate:<br>0.398 (0.219-0.725)<br>p=0.003 | Multivariate:<br>Liver cirrhosis,<br>ALP,<br>microvascular<br>invasion,<br>histological<br>differentiation,<br>BCLC stage |

|     |                                        |               |                                     |           |      |                    |                                                                                                            |                        |     |                                              |                                               |                                                                                                                |
|-----|----------------------------------------|---------------|-------------------------------------|-----------|------|--------------------|------------------------------------------------------------------------------------------------------------|------------------------|-----|----------------------------------------------|-----------------------------------------------|----------------------------------------------------------------------------------------------------------------|
| 13. | Yoshida et al <sup>254</sup><br>2015   | Retrospective | Bladder Cancer                      | Japan     | 181  | LMR <3.51          | 44 patients received adjuvant chemotherapy                                                                 | 58                     | 70  | N/A                                          | Multivariate:<br>3.77 (2.19-6.48) p<0.001     | Multivariate:<br>pT-stage, pN-stage, positive margin                                                           |
| 14. | Yamagishi et al <sup>255</sup><br>2015 | Retrospective | Malignant Pleural Mesothelioma      | Japan     | 44   | LMR <2.74          | Chemotherapy administered in 57.3% of people                                                               | N/A                    | 28  | N/A                                          | Multivariate:<br>2.34 (1.58-3.47) p<0.0001    | Multivariate:<br>Histological subtype, ECOG, Stage, Surgery                                                    |
| 15. | Ozawa et al <sup>256</sup><br>2015     | Retrospective | Colorectal Cancer                   | Japan     | 117  | LMR <3             | 53 patients received adjuvant chemotherapy                                                                 | 24 (3-year death rate) | N/A | Multivariate:<br>2.75 (1.40-5.44) p=0.004    | N/A                                           | Multivariate:<br>Nil Else                                                                                      |
| 16. | Hutterer et al <sup>257</sup><br>2015  | Retrospective | Upper Tract Urothelial Carcinoma    | Austria   | 182  | LMR ≥2             | No mention of adjuvant treatment                                                                           | N/A                    | 82  | N/A                                          | Multivariate:<br>0.56 (0.35-0.92) p=0.021     | Multivariate:<br>Age, pathological T stage                                                                     |
| 17. | Huang et al <sup>258</sup><br>2015     | Retrospective | Oesophageal Squamous Cell Carcinoma | China     | 348  | LMR >2.93          | 105 patients received adjuvant therapy                                                                     | 129                    | N/A | Multivariate:<br>0.600 (0.407-0.885) p=0.010 | N/A                                           | Multivariate:<br>Depth of invasion, nodal metastasis, lymphocyte count                                         |
| 18. | Chen et al <sup>259</sup><br>2015      | Retrospective | Cervical Cancer                     | China     | 485  | LMR >2.87          | 63 patients received radiotherapy, 315 received chemoradiotherapy                                          | N/A                    | 64  | N/A                                          | Multivariate:<br>0.417 (0.244-0.714) p=0.001  | Multivariate:<br>Lymph node metastasis                                                                         |
| 19. | Bhindi et al <sup>237</sup><br>2016    | Retrospective | Bladder Cancer                      | Canada    | 418  | LMR per 1-log unit | 28 received neo-adjuvant chemotherapy, 87 received adjuvant chemotherapy, 54 received salvage chemotherapy | 107                    | 177 | Univariate:<br>0.69 (0.53-0.91) p=0.009      | Univariate:<br>0.70 (0.55-0.88) p=0.002       | Multivariate:<br>T-stage, N-stage, haemoglobin, NLR, age, Charlson co-morbidity index, lymphovascular invasion |
| 20. | Li et al <sup>34</sup><br>2016         | Retrospective | Colorectal Cancer                   | China     | 5336 | LMR >2.83          | 5-Fu based adjuvant chemotherapy for stage 2/3 patients                                                    | 588                    | 611 | N/A                                          | Multivariate:<br>0.761 (0.621-0.932) p=0.008  | Multivariate:<br>Age, T stage, N stage, differentiation, venous invasion, NLR, AGR                             |
| 21. | Chan et al <sup>112</sup><br>2016      | Retrospective | Colorectal Cancer                   | Australia | 1623 | LMR >2.38          | Patients with high-risk stage II and III colon cancer disease were generally offered standard              | N/A                    | 941 | N/A                                          | Multivariate:<br>0.569 (0.478-0.677) p< 0.001 | Multivariate:<br>Age, T stage, N stage, grade                                                                  |

|  |  |  |  |  |  |  |                                                                                                                                  |  |  |  |  |  |
|--|--|--|--|--|--|--|----------------------------------------------------------------------------------------------------------------------------------|--|--|--|--|--|
|  |  |  |  |  |  |  | adjuvant chemotherapy, whereas those with stage II or III rectal cancers were usually treated with neoadjuvant chemoradiotherapy |  |  |  |  |  |
|--|--|--|--|--|--|--|----------------------------------------------------------------------------------------------------------------------------------|--|--|--|--|--|



Table 5: Studies investigating the prognostic value of other scores in an unselected cohort of patients with operable cancer (Abbreviations: RFA (Radiofrequency ablation), TACE (Trans arterial chemoembolization))

| No: Other | Study                                | Type of Study | Cancer                              | Country | Patients (n) | Measure of SIR                                                                                           | Additional Treatment                                                         | Cancer deaths (n) | Overall deaths (n)   | Cancer survival (HR, 95%CI)                   | Overall survival (HR, 95%CI)                                                                                                                    | Independent Prognostic Factors                                                            |
|-----------|--------------------------------------|---------------|-------------------------------------|---------|--------------|----------------------------------------------------------------------------------------------------------|------------------------------------------------------------------------------|-------------------|----------------------|-----------------------------------------------|-------------------------------------------------------------------------------------------------------------------------------------------------|-------------------------------------------------------------------------------------------|
| 1.        | Miyata et al <sup>24</sup><br>2011   | Retrospective | Esophageal Cancer                   | Japan   | 152          | Systemic inflammation score (0-1 vs. 2-3) involving leucocyte count, serum albumin and haemoglobin level | All patients received pre-operative chemotherapy                             | N/A               | 92 (5-year survival) | N/A                                           | Multivariate: 3.17 (1.74-5.78) p=0.0002                                                                                                         | Multivariate: Clinical response, number of metastatic lymph nodes, operative complication |
| 2.        | Tomita et al <sup>27</sup><br>2012   | Retrospective | Non Small Cell Lung Cancer          | Japan   | 301          | NLR and CRP combined                                                                                     | No mention of adjuvant treatment                                             | N/A               | N/A (expressed in %) | N/A                                           | Multivariate: Both low/ both high Risk ratio 0.403 (0.240-0.689) p=0.0012<br><br>Either high/ both high Risk ratio 0.452 (0.225-0.872) p=0.0177 | Multivariate: pT status, pN status, CEA.                                                  |
| 3.        | Feng et al <sup>18</sup><br>2013     | Retrospective | Oesophageal Squamous Cell Carcinoma | China   | 483          | CNP (1-2 vs. 0) involving NLR and PLR                                                                    | No mention of adjuvant or neoadjuvant treatment                              | N/A               | 244                  | N/A                                           | Multivariate: 1.964 (1.371-2.814) p<0.001                                                                                                       | Multivariate: Differentiation, depth of invasion, node metastasis, PLR                    |
| 4.        | Ishizuka et al <sup>14</sup><br>2013 | Retrospective | Colorectal                          | Japan   | 481          | COP-NLR (1, 2/0)                                                                                         | Patients with stage IV disease had chemotherapy                              | 120               | 150                  | Multivariate: OR: 0.464 (0.267-0.807) p=0.007 | N/A                                                                                                                                             | Pathology, LN Mets, CRP, Albumin, CEA, GPS                                                |
| 5.        | Peng et al <sup>260</sup><br>2014    | Retrospective | HCC                                 | China   | 219          | $\Delta$ PLR $\geq$ 2.875                                                                                | No specific mention of neoadjuvant or adjuvant treatment                     | N/A               | 40                   | N/A                                           | Multivariate: 5.929 (2.823-12.448) p<0.001                                                                                                      | Multivariate: Vascular invasion                                                           |
| 6.        | Peng et al <sup>261</sup><br>2014    | Retrospective | Small hepatocellular carcinoma      | China   | 189          | $\Delta$ NLR (postoperative minus preoperative NLR)                                                      | 68 patients received adjuvant therapy after operation (TACE, RFA, sorafenib) | N/A               | 37                   | N/A                                           | Multivariate: 2.637 (1.356-5.128) p=0.004                                                                                                       | Vascular invasion, postoperative NLR.                                                     |
| 7.        | Ishizuka et al <sup>15</sup><br>2014 | Retrospective | Gastric Cancer                      | Japan   | 544          | COP-NLR (0, 1/2)                                                                                         | 343 patients received adjuvant chemotherapy                                  | 55                | 108                  | N/A                                           | Multivariate: 1.781 (1.094-2.899) p=0.020                                                                                                       | Multivariate: Age, tumour type, lymph node metastasis, albumin, COP-NLR                   |

|     |                                      |               |                                          |                |                                                  |                                                                                                                                                                        |                                                                                                |     |     |                                                                                                  |                                                                                                                                                       |                                                                                                   |
|-----|--------------------------------------|---------------|------------------------------------------|----------------|--------------------------------------------------|------------------------------------------------------------------------------------------------------------------------------------------------------------------------|------------------------------------------------------------------------------------------------|-----|-----|--------------------------------------------------------------------------------------------------|-------------------------------------------------------------------------------------------------------------------------------------------------------|---------------------------------------------------------------------------------------------------|
| 8.  | Hyun Hwan Sung <sup>29</sup><br>2014 | Retrospective | Upper Urinary Tract Urothelial Carcinoma | Korea          | 410                                              | Inflammation risk score (none, I, II) involving NLR and ESR                                                                                                            | 91 patients received adjuvant chemotherapy post operation                                      | 67  | 118 | Multivariate:<br>Score I 2.785 (1.343-5.776) p=0.006<br><br>Score II 4.367 (1.987-9.597) p<0.001 | Multivariate:<br>Score I 2.513 (1.434-4.405) p=0.001<br><br>Score II 3.521 (1.888-6.567) p<0.001                                                      | Multivariate:<br>Age, tumour stage, lymph node, margin, micropapillary variant                    |
| 9.  | East et al <sup>30</sup><br>2014     | Retrospective | Colon Cancer                             | United Kingdom | 436<br>Training set, n=386<br><br>Test set, n=50 | White cell count/ lymphocyte ratio (WLR) $\geq 3.4$                                                                                                                    | 26 patients received adjuvant chemotherapy                                                     | N/A | 27  | N/A                                                                                              | Multivariate:<br>Training set: 1.40 (1.04-1.89) p=0.03<br><br>Test set: 4.10 (3.13-7.42) p=0.03                                                       | Multivariate:<br>N stage, R0 resection, adjuvant treatment, T stage, NLR.                         |
| 10. | Shen et al <sup>31</sup><br>2014     | Retrospective | HCC                                      | China          | 332                                              | AST-platelet ratio index (APRI) <0.62 vs. $\geq 0.62$                                                                                                                  | No mention of adjuvant or neoadjuvant treatment                                                | N/A | 209 | N/A                                                                                              | Multivariate:<br>1.508 (1.127-2.016) p=0.006                                                                                                          | Multivariate:<br>APRI, tumour size, noncapsulation, tumour number                                 |
| 11. | Aurello et al <sup>32</sup><br>2014  | Retrospective | Gastric Cancer                           | Italy          | 102                                              | Prognostic index (PI) 0/1/2 involving C-reactive protein and white cell count<br><br>Prognostic nutrition index (PNI) 0/1 involving albumin and total lymphocyte count | 68 patients received adjuvant chemotherapy after surgery                                       | 62  | 62  | N/A                                                                                              | Multivariate:<br>PI 1:<br>0.04 (0.01-0.20) p< 0.001<br><br>PI 2:<br>0.37 (0.16-0.82) p=0.01<br><br>Univariate:<br>PNI 0/1:<br>0.52 (0.26-1.04) p=0.06 | Multivariate:<br>mGPS                                                                             |
| 12. | Takeno et al <sup>42</sup><br>2014   | Retrospective | Gastric                                  | Japan          | 552                                              | HS-mGPS (0/1/2)                                                                                                                                                        | No mention of adjuvant treatment                                                               | N/A | 215 | N/A                                                                                              | Multivariate:<br>1.6748 (1.2867-2.1314) p= 0.0002                                                                                                     | Multivariate:<br>HS-mGPS                                                                          |
| 13. | Cummings et al <sup>19</sup><br>2015 | Retrospective | Endometrial Cancer                       | UK             | 605                                              | MLR <0.19 vs. $\geq 0.19$                                                                                                                                              | 33% of patients received adjuvant radiotherapy, 13% of patients received adjuvant chemotherapy | 96  | 166 | Multivariate:<br>1.26 (0.73-2.15) p=0.409                                                        | Multivariate:<br>1.23 (0.84-1.82) p=0.294                                                                                                             | Multivariate:<br>PLR, combined NLR + PLR, age, FIGO stage, grade, histopathological subtype, LSVI |

|     |                                       |               |                                                 |           |      |                                                                                                  |                                                                                           |     |                      |     |                                                                                                                                                                                   |                                                                                                                |
|-----|---------------------------------------|---------------|-------------------------------------------------|-----------|------|--------------------------------------------------------------------------------------------------|-------------------------------------------------------------------------------------------|-----|----------------------|-----|-----------------------------------------------------------------------------------------------------------------------------------------------------------------------------------|----------------------------------------------------------------------------------------------------------------|
| 14. | Shimizu et al <sup>187</sup><br>2015  | Retrospective | Non-small Cell Lung Cancer                      | Japan     | 334  | Prognostic nutritional index <50 vs. ≥50                                                         | Neither radiotherapy nor chemotherapy administered prior to the surgery                   | N/A | 95 (3-year survival) | N/A | Multivariate:<br>2.40 (1.39-4.14)<br>p=0.002                                                                                                                                      | Multivariate:<br>Age, nodal metastasis, NLR                                                                    |
| 15. | Qin Wang et al <sup>194</sup><br>2015 | Retrospective | Hepatitis B-Associated Hepatocellular Carcinoma | US        | 234  | Prognostic nutritional index >50.5                                                               | 170 patients had antiviral treatment                                                      | N/A | 88 (5-year survival) | N/A | Multivariate:<br>1.3 (0.5-3.4)<br>p=0.5                                                                                                                                           | Multivariate:<br>Tumour size, NLR                                                                              |
| 16. | Sun et al <sup>33</sup><br>2015       | Retrospective | Gastric Cancer                                  | China     | 632  | Prognostic nutritional index <48.2 vs. ≥48.2                                                     | 395 patients received adjuvant chemotherapy                                               | N/A | 448                  | N/A | Multivariate:<br>1.668 (1.368-2.035)<br>p=0.656                                                                                                                                   | Multivariate:<br>Age, respectability, distant metastasis, pathological stage, CEA, postoperative complications |
| 17. | Sun et al <sup>33</sup><br>2015       | Retrospective | Gastric Cancer                                  | China     | 632  | Canton score (0/1/2/3)                                                                           | 395 patients received adjuvant chemotherapy                                               | N/A | 448                  | N/A | Multivariate:<br>Canton score 1<br>1.076 (0.796-1.454)<br>p=0.633<br><br>Canton score 2<br>1.554 (1.151-2.097)<br>p=0.004<br><br>Canton score 3<br>1.643 (1.142-2.364)<br>p=0.007 | Multivariate:<br>Resectability,                                                                                |
| 18. | Zhang et al <sup>16</sup><br>2015     | Retrospective | Non-Small Cell Lung Cancer                      | China     | 1238 | Combination of neoadjuvant platelet count and neutrophil-lymphocyte ratio<br><br>COP-NLR (0/1/2) | Adjuvant treatments including chemotherapy, radiotherapy and concurrent chemoradiotherapy | N/A | 686                  | N/A | Multivariate:<br>1.810 (1.587-2.056)<br>p<0.001                                                                                                                                   | Multivariate:<br>TNM stage, LDH, D-dimer, COP-NLR                                                              |
| 19. | Chan et al <sup>209</sup><br>2015     | Retrospective | Hepatocellular Carcinoma                        | Hong Kong | 324  | Prognostic nutritional                                                                           | 282 patients with chronic viral hepatitis received antiviral therapy                      | N/A | 79 (5-year survival) | N/A | Multivariate:<br>2.778 (1.630-4.813)                                                                                                                                              | Multivariate:<br>Antiviral therapy, microvascular invasion                                                     |

|     |                                      |               |                                          |             |     |                                                                                   |                                                                                                                                                       |                       |                       |                                                                                                         |                                                                                                         |                                                                                                  |
|-----|--------------------------------------|---------------|------------------------------------------|-------------|-----|-----------------------------------------------------------------------------------|-------------------------------------------------------------------------------------------------------------------------------------------------------|-----------------------|-----------------------|---------------------------------------------------------------------------------------------------------|---------------------------------------------------------------------------------------------------------|--------------------------------------------------------------------------------------------------|
|     |                                      |               |                                          |             |     | index < 45                                                                        |                                                                                                                                                       |                       |                       |                                                                                                         | p<0.001                                                                                                 |                                                                                                  |
| 20. | Kim et al <sup>215</sup><br>2015     | Retrospective | Upper Urinary Tract Urothelial Carcinoma | South Korea | 277 | PNI ≥45 vs. <45                                                                   | 71 patients received adjuvant chemotherapy                                                                                                            | 73                    | 96                    | Multivariate:<br>0.947 (0.491-1.826) p=0.870                                                            | N/A                                                                                                     | Multivariate:<br>Bladder cuff excision, pathologic T stage, lymphovascular invasion, derived NLR |
| 21. | Neal et al <sup>17</sup><br>2015     | Retrospective | Colorectal Liver Metastases              | UK          | 302 | COP-NLR (2/1/0)<br>:Combination of platelet count and neutrophil lymphocyte ratio | 132 patients had systemic chemotherapy in the 6 months prior to liver resection, 126 patients received systemic chemotherapy following metastasectomy | 204 (5-year survival) | 214 (5-year survival) | Univariate:<br>1.243 (1.003-1.541) p=0.047                                                              | Univariate:<br>1.230 (1.005-1.505) p=0.045                                                              | Multivariate:<br>Clinical risk score                                                             |
| 22. | Neal et al <sup>17</sup><br>2015     | Retrospective | Colorectal Liver Metastases              | UK          | 302 | Prognostic nutritional index (0/1)                                                | 132 patients had systemic chemotherapy in the 6 months prior to liver resection, 126 patients received systemic chemotherapy following metastasectomy | 204 (5-year survival) | 214 (5-year survival) | Univariate:<br>0.657 (0.437-0.988) p=0.043                                                              | Univariate:<br>0.707 (0.475-1.053) p=0.088                                                              | Multivariate:<br>Clinical risk score                                                             |
| 23. | Cummings et al <sup>19</sup><br>2015 | Retrospective | Endometrial Cancer                       | UK          | 605 | Combined NLR + PLR<br><br>(both low, either high, both high)                      | 33% of patients received adjuvant radiotherapy, 13% of patients received adjuvant chemotherapy                                                        | 96                    | 166                   | Multivariate:<br>Either high:<br>1.46 (0.87-2.47) p=0.156<br><br>Both high:<br>2.26 (1.24-4.13) p=0.008 | Multivariate:<br>Either high:<br>1.59 (1.08-2.35) p=0.018<br><br>Both high:<br>2.54 (1.61-4.01) p<0.001 | Multivariate:<br>Age, FIGO stage, grade, histopathological subtype, LVSI                         |
| 24. | Ishizuka et al <sup>21</sup><br>2015 | Retrospective | Colorectal Cancer                        | Japan       | 627 | CRP/ albumin ratio (CAR) >0.038 vs. ≤0.038                                        | No mention of adjuvant treatment                                                                                                                      | 110                   | 142                   | N/A                                                                                                     | Multivariate:<br>2.613 (1.621-4.212) p< 0.001                                                           | Multivariate:<br>Pathological differentiation, CEA, stage, GPS, NLR                              |

|     |                                      |               |                                     |             |                                                  |                                                                                                   |                                                                                           |     |     |     |                                                                                                                           |                                                                                    |
|-----|--------------------------------------|---------------|-------------------------------------|-------------|--------------------------------------------------|---------------------------------------------------------------------------------------------------|-------------------------------------------------------------------------------------------|-----|-----|-----|---------------------------------------------------------------------------------------------------------------------------|------------------------------------------------------------------------------------|
| 25. | Chen et al <sup>28</sup><br>2015     | Retrospective | Gastric Carcinoma                   | China       | 1332<br>Training set: 888<br>Validation set: 444 | Neoadjuvant haemoglobin, albumin, lymphocyte and platelet (HALP) <56.8 vs. ≥56.8                  | No mention of adjuvant treatment                                                          | N/A | 581 | N/A | Multivariate:<br>Training set:<br>0.782 (0.617-0.993)<br>p=0.043<br><br>Validation set:<br>0.700 (0.496-0.987)<br>p=0.042 | Multivariate:<br>Age, longitudinal location, tumour size, N stage, M stage         |
| 26. | Okamura et al <sup>107</sup><br>2015 | Retrospective | Hepatocellular Carcinoma            | Japan       | 256                                              | Prognostic nutritional index <48.5 vs. ≥48.5                                                      | No mention of adjuvant treatment                                                          | N/A | 86  | N/A | Multivariate:<br>1.96 (1.21-3.18)<br>p=0.006                                                                              | Multivariate:<br>AFP, des-gamma-carboxy prothrombin, high NLR                      |
| 27. | Xu et al <sup>22</sup><br>2015       | Retrospective | Oesophageal SCC                     | China       | 468                                              | CRP/Albumin Ratio >0.50                                                                           | 196 patient received adjuvant chemo and radiotherapy                                      | N/A | 259 | N/A | Multivariate:<br>2.44 (1.82-3.26)<br>p<0.0001                                                                             | Multivariate:<br>Lymph Node Mets,<br>Venous/lymphatic invasion, CRP/Alb Ration     |
| 28. | Chuan Li et al <sup>20</sup><br>2015 | Retrospective | Hepatocellular Carcinoma            | China       | 236                                              | Postoperative NLR-PLR (0/1/2)<br><br>NLR> 2.3 and PLR>116 score 2, either 1 score 1, none score 0 | Antiviral drug (entecavir or lamivudine) were given to patients with positive HBV-DNA     | N/A | 41  | N/A | Multivariate:<br>2.894 (1.992-4.2)<br>p<0.001                                                                             | Multivariate:<br>Microvascular invasion, transfusion                               |
| 29. | Arigami et al <sup>39</sup><br>2015  | Retrospective | Oesophageal Squamous Cell Carcinoma | Japan       | 238                                              | F-NLR (0-1/2)                                                                                     | Patients who have undergone neoadjuvant treatment were excluded                           | N/A | 100 | N/A | Multivariate:<br>1.94 (1.04-3.53)<br>p=0.037                                                                              | Multivariate:<br>Depth of tumour invasion, lymph node metastasis                   |
| 30. | Ha et al <sup>25</sup><br>2016       | Retrospective | Ampulla of Vater Cancer             | South Korea | 227                                              | Systemic inflammatory index (≤780 vs. >780)                                                       | Adjuvant treatments including chemotherapy, radiotherapy and concurrent chemoradiotherapy | N/A | 105 | N/A | Multivariate:<br>0.924 (0.44-1.93)<br>p=0.833                                                                             | Multivariate:<br>Vascular invasion, CA19-9.                                        |
| 31. | Li et al <sup>34</sup><br>2016       | Retrospective | Colorectal Cancer                   | China       | 5336                                             | Albumin/globulin ratio (<1.50 vs. ≥1.50)                                                          | 5-Fu based adjuvant chemotherapy for stage 2/3 patients                                   | 588 | 611 | N/A | Multivariate:<br>0.646 (0.543-0.767)<br>p<0.001                                                                           | Multivariate:<br>Age, T stage, N stage, differentiation, venous invasion, LMR, NLR |

|     |                                       |               |                                                              |         |                                             |                                                                                                                                                |                                                                                                                  |     |                          |     |                                                                                               |                                                                                             |
|-----|---------------------------------------|---------------|--------------------------------------------------------------|---------|---------------------------------------------|------------------------------------------------------------------------------------------------------------------------------------------------|------------------------------------------------------------------------------------------------------------------|-----|--------------------------|-----|-----------------------------------------------------------------------------------------------|---------------------------------------------------------------------------------------------|
| 32. | Christina et al <sup>35</sup><br>2016 | Retrospective | Oral cancer                                                  | Austria | 144                                         | CRP/<br>Neutrophils<br>(low/high)                                                                                                              | All patients received<br>neoadjuvant<br>radiotherapy in<br>combination with<br>systemic cytotoxic<br>therapy     | N/A | 60 (5-year<br>survival)  | N/A | Multivariate:<br>2.7 (0.68-10.75)<br>p=0.16                                                   | Multivariate:<br>Regression grade                                                           |
| 33. | Wang et al <sup>36</sup><br>2016      | Retrospective | Ovarian<br>Cancer                                            | China   | 143                                         | Prognostic<br>Inflammation<br>Score (0/1/2)<br><br>involving NLR<br>and serum<br>albumin                                                       | No mention of<br>adjuvant treatment                                                                              | N/A | 51                       | N/A | Multivariate:<br>PIS 1: 0.33 (0.16-0.67)<br>p=0.002<br><br>PIS 2: 0.18 (0.09-0.38)<br>p<0.001 | Multivariate:<br>Metastasis,<br>prognostic<br>inflammation<br>score                         |
| 34. | Toyokawa et al <sup>37</sup><br>2016  | Retrospective | Thoracic<br>Oesophage<br>al<br>Squamous<br>Cell<br>Carcinoma | Japan   | 185                                         | CONUT score<br>(≥3, ≤2)<br>involving serum<br>albumin<br>concentration,<br>total<br>lymphocyte<br>count, total<br>cholesterol<br>concentration | 46 patients received<br>neoadjuvant<br>treatment (39<br>chemotherapy, 6<br>chemoradiotherapy,<br>1 radiotherapy) | N/A | 77                       | N/A | Multivariate:<br>2.303 (1.191-4.455)<br>p=0.013                                               | Multivariate:<br>Sex, performance<br>status, ASA, cTNM<br>stage                             |
| 35. | Fu et al <sup>110</sup><br>2016       | Retrospective | Hepatocellu<br>lar<br>Carcinoma                              | China   | Training:<br>772<br><br>Validatio<br>n: 349 | Inflammation-<br>based score<br>(IBS)                                                                                                          | No mention of<br>adjuvant treatment                                                                              | N/A | 377 (4-year<br>survival) | N/A | Multivariate:<br>Training 4.247 (2.786-<br>6.473) p<0.001                                     | Multivariate:<br>GGT, mGPS,<br>tumour number,<br>microscopic<br>vascular invasion,<br>BCLC. |

## References:

- 1 Organization, W. H. *World Health Organization Cancer Fact Sheet*, <<http://www.who.int/mediacentre/factsheets/fs297/en/>> (2017).
- 2 Roxburgh, C. S. & McMillan, D. C. Role of systemic inflammatory response in predicting survival in patients with primary operable cancer. *Future oncology (London, England)* **6**, 149-163, doi:10.2217/fon.09.136 (2010).
- 3 Proctor, M. J. *et al.* A comparison of inflammation-based prognostic scores in patients with cancer. A Glasgow Inflammation Outcome Study. *European journal of cancer (Oxford, England : 1990)* **47**, 2633-2641, doi:10.1016/j.ejca.2011.03.028 (2011).
- 4 Bosanquet, N. & Sikora, K. The economics of cancer care in the UK. *The Lancet. Oncology* **5**, 568-574, doi:10.1016/s1470-2045(04)01569-4 (2004).
- 5 Coussens, L. M. & Werb, Z. Inflammation and cancer. *Nature* **420**, 860-867, doi:10.1038/nature01322 (2002).
- 6 Mantovani, A., Romero, P., Palucka, A. K. & Marincola, F. M. Tumour immunity: effector response to tumour and role of the microenvironment. *Lancet (London, England)* **371**, 771-783, doi:10.1016/s0140-6736(08)60241-x (2008).
- 7 Park, J. H., Watt, D. G., Roxburgh, C. S., Horgan, P. G. & McMillan, D. C. Colorectal Cancer, Systemic Inflammation, and Outcome: Staging the Tumor and Staging the Host. *Annals of surgery* **263**, 326-336, doi:10.1097/sla.0000000000001122 (2016).
- 8 McMillan, D. C., Crozier, J. E., Canna, K., Angerson, W. J. & McArdle, C. S. Evaluation of an inflammation-based prognostic score (GPS) in patients undergoing resection for colon and rectal cancer. *Int J Colorectal Dis* **22**, 881-886, doi:10.1007/s00384-006-0259-6 (2007).
- 9 Guthrie, G. J. *et al.* The systemic inflammation-based neutrophil-lymphocyte ratio: experience in patients with cancer. *Critical reviews in oncology/hematology* **88**, 218-230, doi:10.1016/j.critrevonc.2013.03.010 (2013).
- 10 Templeton, A. J. *et al.* Prognostic role of neutrophil-to-lymphocyte ratio in solid tumors: a systematic review and meta-analysis. *Journal of the National Cancer Institute* **106**, dju124, doi:10.1093/jnci/dju124 (2014).
- 11 McMillan, D. C. The systemic inflammation-based Glasgow Prognostic Score: a decade of experience in patients with cancer. *Cancer treatment reviews* **39**, 534-540, doi:10.1016/j.ctrv.2012.08.003 (2013).
- 12 Dolan, R. D., McSorley, S. T., Horgan, P. G., Laird, B. & McMillan, D. C. The role of the systemic inflammatory response in predicting outcomes in patients with advanced inoperable cancer: Systematic review and meta-analysis. *Critical Reviews in Oncology/Hematology*, doi:https://doi.org/10.1016/j.critrevonc.2017.06.002.
- 13 Higgins, J. G., S. Vol. 1 (ed J. Green Higgins, S.) 675 (John Wiley & Sons Ltd, London 2011).
- 14 Ishizuka, M., Nagata, H., Takagi, K., Iwasaki, Y. & Kubota, K. Combination of platelet count and neutrophil to lymphocyte ratio is a useful predictor of postoperative survival in patients with colorectal cancer. *British journal of cancer* **109**, 401-407, doi:10.1038/bjc.2013.350 (2013).
- 15 Ishizuka, M., Oyama, Y., Abe, A. & Kubota, K. Combination of platelet count and neutrophil to lymphocyte ratio is a useful predictor of postoperative survival in patients undergoing surgery for gastric cancer. *Journal of surgical oncology* **110**, 935-941, doi:10.1002/jso.23753 (2014).
- 16 Zhang, H. *et al.* Prognostic Significance of Combination of Preoperative Platelet Count and Neutrophil-Lymphocyte Ratio (COP-NLR) in Patients with Non-Small Cell Lung Cancer: Based on a Large Cohort Study. *PLoS one* **10**, e0126496, doi:10.1371/journal.pone.0126496 (2015).

- 17 Neal, C. P. *et al.* Prognostic performance of inflammation-based prognostic indices in patients with resectable colorectal liver metastases. *Med Oncol* **32**, 144, doi:10.1007/s12032-015-0590-2 (2015).
- 18 Feng, J. F., Huang, Y. & Liu, J. S. Combination of neutrophil lymphocyte ratio and platelet lymphocyte ratio is a useful predictor of postoperative survival in patients with esophageal squamous cell carcinoma. *Onco Targets Ther* **6**, 1605-1612, doi:10.2147/ott.s52501 (2013).
- 19 Cummings, M. *et al.* Preoperative neutrophil:lymphocyte and platelet:lymphocyte ratios predict endometrial cancer survival. *Br J Cancer* **113**, 311-320, doi:10.1038/bjc.2015.200 (2015).
- 20 Li, C. *et al.* Postoperative neutrophil-to-lymphocyte ratio plus platelet-to-lymphocyte ratio predicts the outcomes of hepatocellular carcinoma. *J Surg Res* **198**, 73-79, doi:10.1016/j.jss.2015.05.003 (2015).
- 21 Ishizuka, M. *et al.* Clinical Significance of the C-Reactive Protein to Albumin Ratio for Survival After Surgery for Colorectal Cancer. *Annals of surgical oncology* **23**, 900-907, doi:10.1245/s10434-015-4948-7 (2016).
- 22 Xu, X. L., Yu, H. Q., Hu, W., Song, Q. & Mao, W. M. A Novel Inflammation-Based Prognostic Score, the C-Reactive Protein/Albumin Ratio Predicts the Prognosis of Patients with Operable Esophageal Squamous Cell Carcinoma. *PloS one* **10**, e0138657, doi:10.1371/journal.pone.0138657 (2015).
- 23 Ubukata, H. *et al.* Evaluations of interferon-gamma/interleukin-4 ratio and neutrophil/lymphocyte ratio as prognostic indicators in gastric cancer patients. *J Surg Oncol* **102**, 742-747, doi:10.1002/jso.21725 (2010).
- 24 Miyata, H. *et al.* Prognostic value of an inflammation-based score in patients undergoing pre-operative chemotherapy followed by surgery for esophageal cancer. *Exp Ther Med* **2**, 879-885, doi:10.3892/etm.2011.308 (2011).
- 25 Ha, H. R. *et al.* Survival Outcomes According to Adjuvant Treatment and Prognostic Factors Including Host Immune Markers in Patients with Curatively Resected Ampulla of Vater Cancer. *PloS one* **11**, e0151406, doi:10.1371/journal.pone.0151406 (2016).
- 26 Ilie, M. *et al.* Predictive clinical outcome of the intratumoral CD66b-positive neutrophil-to-CD8-positive T-cell ratio in patients with resectable nonsmall cell lung cancer. *Cancer* **118**, 1726-1737, doi:10.1002/cncr.26456 (2012).
- 27 Tomita, M., Shimizu, T., Ayabe, T., Nakamura, K. & Onitsuka, T. Elevated preoperative inflammatory markers based on neutrophil-to-lymphocyte ratio and C-reactive protein predict poor survival in resected non-small cell lung cancer. *Anticancer research* **32**, 3535-3538 (2012).
- 28 Chen, X. L. *et al.* Prognostic significance of the combination of preoperative hemoglobin, albumin, lymphocyte and platelet in patients with gastric carcinoma: a retrospective cohort study. *Oncotarget* **6**, 41370-41382, doi:10.18632/oncotarget.5629 (2015).
- 29 Sung, H. H. *et al.* Clinical significance of prognosis using the neutrophil-lymphocyte ratio and erythrocyte sedimentation rate in patients undergoing radical nephroureterectomy for upper urinary tract urothelial carcinoma. *BJU international* **115**, 587-594, doi:10.1111/bju.12846 (2015).
- 30 East, J. M. *et al.* Ratios derived from an array of standard haematological indices predict the oncological outcome in colon cancer. *Colorectal Dis* **16**, 442-449, doi:10.1111/codi.12561 (2014).
- 31 Shen, S. L. *et al.* Preoperative aspartate aminotransferase to platelet ratio is an independent prognostic factor for hepatitis B-induced hepatocellular carcinoma after hepatic resection. *Ann Surg Oncol* **21**, 3802-3809, doi:10.1245/s10434-014-3771-x (2014).



- 32 Aurello, P. *et al.* Value of preoperative inflammation-based prognostic scores in predicting overall survival and disease-free survival in patients with gastric cancer. *Annals of surgical oncology* **21**, 1998-2004, doi:10.1245/s10434-014-3533-9 (2014).
- 33 Sun, K. Y. *et al.* Novel immunological and nutritional-based prognostic index for gastric cancer. *World journal of gastroenterology* **21**, 5961-5971, doi:10.3748/wjg.v21.i19.5961 (2015).
- 34 Li, Y. *et al.* Nomograms for predicting prognostic value of inflammatory biomarkers in colorectal cancer patients after radical resection. *International journal of cancer* **139**, 220-231, doi:10.1002/ijc.30071 (2016).
- 35 Christina, E. C., Cornelia, C. & Edgar, S. Neoadjuvant radiotherapy plus radical surgery for locally advanced stage III/IV oral cancer: Analysis of prognostic factors affecting overall survival. *Oral oncology* **60**, 1-7, doi:10.1016/j.oraloncology.2016.06.014 (2016).
- 36 Wang, Y. Q. *et al.* A novel prognostic inflammation score predicts outcomes in patients with ovarian cancer. *Clinica chimica acta; international journal of clinical chemistry* **456**, 163-169, doi:10.1016/j.cca.2016.03.013 (2016).
- 37 Toyokawa, T. *et al.* The pretreatment Controlling Nutritional Status (CONUT) score is an independent prognostic factor in patients with resectable thoracic esophageal squamous cell carcinoma: results from a retrospective study. *BMC Cancer* **16**, 722, doi:10.1186/s12885-016-2696-0 (2016).
- 38 Nakamura, M. *et al.* New prognostic score for the survival of patients with esophageal squamous cell carcinoma. *Surg Today* **44**, 875-883, doi:10.1007/s00595-013-0628-z (2014).
- 39 Arigami, T. *et al.* Analysis of the Fibrinogen and Neutrophil-Lymphocyte Ratio in Esophageal Squamous Cell Carcinoma: A Promising Blood Marker of Tumor Progression and Prognosis. *Medicine (Baltimore)* **94**, e1702, doi:10.1097/md.0000000000001702 (2015).
- 40 Hirashima, K. *et al.* Prognostic significance of the modified Glasgow prognostic score in elderly patients with gastric cancer. *Journal of gastroenterology* **49**, 1040-1046, doi:10.1007/s00535-013-0855-5 (2014).
- 41 Kawashima, M. *et al.* Significance of the Glasgow Prognostic Score as a prognostic indicator for lung cancer surgery. *Interactive cardiovascular and thoracic surgery* **21**, 637-643, doi:10.1093/icvts/ivv223 (2015).
- 42 Takeno, S. *et al.* The high-sensitivity modified Glasgow prognostic score is superior to the modified Glasgow prognostic score as a prognostic predictor in patients with resectable gastric cancer. *Oncology* **87**, 205-214, doi:10.1159/000362601 (2014).
- 43 Ishizuka, M. *et al.* Usefulness of a modified inflammation-based prognostic system for predicting postoperative mortality of patients undergoing surgery for primary hepatocellular carcinoma. *J Surg Oncol* **103**, 801-806, doi:10.1002/jso.21857 (2011).
- 44 Bain, B., Seed, M. & Godsland, I. Normal values for peripheral blood white cell counts in women of four different ethnic origins. *Journal of clinical pathology* **37**, 188-193 (1984).
- 45 Bain, B. J. Ethnic and sex differences in the total and differential white cell count and platelet count. *Journal of clinical pathology* **49**, 664-666 (1996).
- 46 Azab, B., Camacho-Rivera, M. & Taioli, E. Average values and racial differences of neutrophil lymphocyte ratio among a nationally representative sample of United States subjects. *PloS one* **9**, e112361, doi:10.1371/journal.pone.0112361 (2014).
- 47 Guthrie, G. J., Roxburgh, C. S., Farhan-Alanie, O. M., Horgan, P. G. & McMillan, D. C. Comparison of the prognostic value of longitudinal measurements of systemic inflammation in patients undergoing curative resection of colorectal cancer. *British journal of cancer* **109**, 24-28, doi:10.1038/bjc.2013.330 (2013).

- 48 Wang, D. S. *et al.* Comparison of the prognostic values of various inflammation based factors in patients with pancreatic cancer. *Medical oncology (Northwood, London, England)* **29**, 3092-3100, doi:10.1007/s12032-012-0226-8 (2012).
- 49 Okuno, M. *et al.* Evaluation of inflammation-based prognostic scores in patients undergoing hepatobiliary resection for perihilar cholangiocarcinoma. *Journal of gastroenterology* **51**, 153-161, doi:10.1007/s00535-015-1103-y (2016).
- 50 Ishizuka, M., Nagata, H., Takagi, K., Horie, T. & Kubota, K. Inflammation-based prognostic score is a novel predictor of postoperative outcome in patients with colorectal cancer. *Annals of surgery* **246**, 1047-1051, doi:10.1097/SLA.0b013e3181454171 (2007).
- 51 Leitch, E. F. *et al.* Comparison of the prognostic value of selected markers of the systemic inflammatory response in patients with colorectal cancer. *British journal of cancer* **97**, 1266-1270, doi:10.1038/sj.bjc.6604027 (2007).
- 52 Kobayashi, T. *et al.* Inflammation-based prognostic score, prior to neoadjuvant chemoradiotherapy, predicts postoperative outcome in patients with esophageal squamous cell carcinoma. *Surgery* **144**, 729-735, doi:10.1016/j.surg.2008.08.015 (2008).
- 53 Roxburgh, C. S., Salmond, J. M., Horgan, P. G., Oien, K. A. & McMillan, D. C. Comparison of the prognostic value of inflammation-based pathologic and biochemical criteria in patients undergoing potentially curative resection for colorectal cancer. *Annals of surgery* **249**, 788-793, doi:10.1097/SLA.0b013e3181a3e738 (2009).
- 54 Ishizuka, M. *et al.* Systemic inflammatory response predicts postoperative outcome in patients with liver metastases from colorectal cancer. *J Surg Oncol* **100**, 38-42, doi:10.1002/jso.21294 (2009).
- 55 Crozier, J. E. *et al.* Relationship between emergency presentation, systemic inflammatory response, and cancer-specific survival in patients undergoing potentially curative surgery for colon cancer. *American journal of surgery* **197**, 544-549, doi:10.1016/j.amjsurg.2007.12.052 (2009).
- 56 Roxburgh, C. S., Wallace, A. M., Guthrie, G. K., Horgan, P. G. & McMillan, D. C. Comparison of the prognostic value of tumour- and patient-related factors in patients undergoing potentially curative surgery for colon cancer. *Colorectal Dis* **12**, 987-994, doi:10.1111/j.1463-1318.2009.01961.x (2010).
- 57 Richards, C. H. *et al.* The relationship between patient physiology, the systemic inflammatory response and survival in patients undergoing curative resection of colorectal cancer. *British journal of cancer* **103**, 1356-1361, doi:10.1038/sj.bjc.6605919 (2010).
- 58 Hefler-Frischmuth, K. *et al.* The inflammation-based modified Glasgow Prognostic Score in patients with vulvar cancer. *Eur J Obstet Gynecol Reprod Biol* **149**, 102-105, doi:10.1016/j.ejogrb.2009.12.027 (2010).
- 59 Kobayashi, T. *et al.* Inflammation-based prognostic score and number of lymph node metastases are independent prognostic factors in esophageal squamous cell carcinoma. *Dig Surg* **27**, 232-237, doi:10.1159/000276910 (2010).
- 60 Kobayashi, T. *et al.* Elevated C-reactive protein and hypoalbuminemia measured before resection of colorectal liver metastases predict postoperative survival. *Dig Surg* **27**, 285-290, doi:10.1159/000280021 (2010).
- 61 Moug, S. J. *et al.* Comparison of positive lymph node ratio with an inflammation-based prognostic score in colorectal cancer. *Br J Surg* **98**, 282-286, doi:10.1002/bjs.7294 (2011).
- 62 Dutta, S., Crumley, A. B., Fullarton, G. M., Horgan, P. G. & McMillan, D. C. Comparison of the prognostic value of tumour- and patient-related factors in patients undergoing potentially

- curative resection of oesophageal cancer. *World J Surg* **35**, 1861-1866, doi:10.1007/s00268-011-1130-7 (2011).
- 63 Dutta, S., Al-Mrabt, N. M., Fullarton, G. M., Horgan, P. G. & McMillan, D. C. A comparison of POSSUM and GPS models in the prediction of post-operative outcome in patients undergoing oesophago-gastric cancer resection. *Annals of surgical oncology* **18**, 2808-2817, doi:10.1245/s10434-011-1676-5 (2011).
- 64 Crumley, A. B. *et al.* Interrelationships between tumor proliferative activity, leucocyte and macrophage infiltration, systemic inflammatory response, and survival in patients selected for potentially curative resection for gastroesophageal cancer. *Annals of surgical oncology* **18**, 2604-2612, doi:10.1245/s10434-011-1658-7 (2011).
- 65 Jamieson, N. B. *et al.* A prospective comparison of the prognostic value of tumor- and patient-related factors in patients undergoing potentially curative surgery for pancreatic ductal adenocarcinoma. *Annals of surgical oncology* **18**, 2318-2328, doi:10.1245/s10434-011-1560-3 (2011).
- 66 Roxburgh, C. S. *et al.* Relationship between preoperative comorbidity, systemic inflammatory response, and survival in patients undergoing curative resection for colorectal cancer. *Annals of surgical oncology* **18**, 997-1005, doi:10.1245/s10434-010-1410-8 (2011).
- 67 Vashist, Y. K. *et al.* Glasgow Prognostic Score is a predictor of perioperative and long-term outcome in patients with only surgically treated esophageal cancer. *Annals of surgical oncology* **18**, 1130-1138, doi:10.1245/s10434-010-1383-7 (2011).
- 68 Nozoe, T. *et al.* Significance of modified Glasgow prognostic score as a useful indicator for prognosis of patients with gastric carcinoma. *American journal of surgery* **201**, 186-191, doi:10.1016/j.amjsurg.2010.01.030 (2011).
- 69 Roxburgh, C. *et al.* Adjuvant chemotherapy for resected colon cancer: comparison of the prognostic value of tumour and patient related factors. *Int J Colorectal Dis* **26**, 483-492, doi:10.1007/s00384-010-1120-5 (2011).
- 70 Dutta, S. *et al.* The relationship between tumour necrosis, tumour proliferation, local and systemic inflammation, microvessel density and survival in patients undergoing potentially curative resection of oesophageal adenocarcinoma. *British journal of cancer* **106**, 702-710, doi:10.1038/bjc.2011.610 (2012).
- 71 Ishizuka, M. *et al.* Impact of an inflammation-based prognostic system on patients undergoing surgery for hepatocellular carcinoma: a retrospective study of 398 Japanese patients. *American journal of surgery* **203**, 101-106, doi:10.1016/j.amjsurg.2010.09.030 (2012).
- 72 Richards, C. H. *et al.* Prognostic value of tumour necrosis and host inflammatory responses in colorectal cancer. *Br J Surg* **99**, 287-294, doi:10.1002/bjs.7755 (2012).
- 73 Qayyum, T. *et al.* Prospective study of the role of inflammation in renal cancer. *Urol Int* **88**, 277-281, doi:10.1159/000334971 (2012).
- 74 Sugimoto, K. *et al.* Glasgow prognostic score as a prognostic factor in patients undergoing curative surgery for colorectal cancer. *Dig Surg* **29**, 503-509, doi:10.1159/000346002 (2012).
- 75 Kubota, T. *et al.* Significance of the inflammation-based Glasgow prognostic score for short- and long-term outcomes after curative resection of gastric cancer. *J Gastrointest Surg* **16**, 2037-2044, doi:10.1007/s11605-012-2036-x (2012).
- 76 Powell, A. G. *et al.* The relationship between tumour site, clinicopathological characteristics and cancer-specific survival in patients undergoing surgery for colorectal cancer. *Colorectal Dis* **14**, 1493-1499, doi:10.1111/j.1463-1318.2012.03048.x (2012).

- 77 La Torre, M. *et al.* The glasgow prognostic score as a predictor of survival in patients with potentially resectable pancreatic adenocarcinoma. *Annals of surgical oncology* **19**, 2917-2923, doi:10.1245/s10434-012-2348-9 (2012).
- 78 Dutta, S., Crumley, A. B., Fullarton, G. M., Horgan, P. G. & McMillan, D. C. Comparison of the prognostic value of tumour and patient related factors in patients undergoing potentially curative resection of gastric cancer. *American journal of surgery* **204**, 294-299, doi:10.1016/j.amjsurg.2011.10.015 (2012).
- 79 Wang, D. S. *et al.* Comparison of the prognostic value of various preoperative inflammation-based factors in patients with stage III gastric cancer. *Tumour biology : the journal of the International Society for Oncodevelopmental Biology and Medicine* **33**, 749-756, doi:10.1007/s13277-011-0285-z (2012).
- 80 Lamb, G. W., Aitchison, M., Ramsey, S., Housley, S. L. & McMillan, D. C. Clinical utility of the Glasgow Prognostic Score in patients undergoing curative nephrectomy for renal clear cell cancer: basis of new prognostic scoring systems. *British journal of cancer* **106**, 279-283, doi:10.1038/bjc.2011.556 (2012).
- 81 Ishizuka, M., Nagata, H., Takagi, K., Iwasaki, Y. & Kubota, K. Inflammation-based prognostic system predicts postoperative survival of colorectal cancer patients with a normal preoperative serum level of carcinoembryonic antigen. *Annals of surgical oncology* **19**, 3422-3431, doi:10.1245/s10434-012-2384-5 (2012).
- 82 Jiang, X. *et al.* Prognostic importance of the inflammation-based Glasgow prognostic score in patients with gastric cancer. *British journal of cancer* **107**, 275-279, doi:10.1038/bjc.2012.262 (2012).
- 83 Jamieson, N. B. *et al.* The relationship between tumor inflammatory cell infiltrate and outcome in patients with pancreatic ductal adenocarcinoma. *Annals of surgical oncology* **19**, 3581-3590, doi:10.1245/s10434-012-2370-y (2012).
- 84 Stotz, M. *et al.* Increased neutrophil-lymphocyte ratio is a poor prognostic factor in patients with primary operable and inoperable pancreatic cancer. *British journal of cancer* **109**, 416-421, doi:10.1038/bjc.2013.332 (2013).
- 85 Shiba, H. *et al.* Glasgow prognostic score predicts therapeutic outcome after pancreaticoduodenectomy for carcinoma of the ampulla of vater. *Anticancer research* **33**, 2715-2721 (2013).
- 86 Oshiro, Y. *et al.* Inflammation-based prognostic score is a useful predictor of postoperative outcome in patients with extrahepatic cholangiocarcinoma. *J Hepatobiliary Pancreat Sci* **20**, 389-395, doi:10.1007/s00534-012-0550-6 (2013).
- 87 Horino, K. *et al.* Glasgow Prognostic Score as a useful prognostic factor after hepatectomy for hepatocellular carcinoma. *Int J Clin Oncol* **18**, 829-838, doi:10.1007/s10147-012-0451-3 (2013).
- 88 Ishizuka, M., Nagata, H., Takagi, K., Iwasaki, Y. & Kubota, K. Inflammation-based prognostic system predicts survival after surgery for stage IV colorectal cancer. *American journal of surgery* **205**, 22-28, doi:10.1016/j.amjsurg.2012.04.012 (2013).
- 89 Son, H. J. *et al.* Preoperative plasma hyperfibrinogenemia is predictive of poor prognosis in patients with nonmetastatic colon cancer. *Annals of surgical oncology* **20**, 2908-2913, doi:10.1245/s10434-013-2968-8 (2013).
- 90 Nozoe, T., Matono, R., Ijichi, H., Ohga, T. & Ezaki, T. Glasgow Prognostic Score (GPS) can be a useful indicator to determine prognosis of patients with colorectal carcinoma. *Int Surg* **99**, 512-517, doi:10.9738/int Surg-d-13-00118.1 (2014).

- 91 Pinato, D. J. *et al.* Prognostic performance of inflammation-based prognostic indices in primary operable non-small cell lung cancer. *British journal of cancer* **110**, 1930-1935, doi:10.1038/bjc.2014.145 (2014).
- 92 Huang, J. *et al.* The inflammation-based scores to predict prognosis of patients with hepatocellular carcinoma after hepatectomy. *Medical oncology (Northwood, London, England)* **31**, 883, doi:10.1007/s12032-014-0883-x (2014).
- 93 Feng, J. F., Zhao, Q. & Chen, Q. X. Prognostic significance of Glasgow prognostic score in patients undergoing esophagectomy for esophageal squamous cell carcinoma. *Saudi J Gastroenterol* **20**, 48-53, doi:10.4103/1319-3767.126319 (2014).
- 94 Forrest, R. *et al.* Comparison of visual and automated assessment of tumour inflammatory infiltrates in patients with colorectal cancer. *European journal of cancer (Oxford, England : 1990)* **50**, 544-552, doi:10.1016/j.ejca.2013.11.003 (2014).
- 95 Wu, X. S. *et al.* Evaluation of two inflammation-based prognostic scores in patients with resectable gallbladder carcinoma. *Annals of surgical oncology* **21**, 449-457, doi:10.1245/s10434-013-3292-z (2014).
- 96 Sun, Z. Q. *et al.* Prognostic significance of preoperative fibrinogen in patients with colon cancer. *World J Gastroenterol* **20**, 8583-8591, doi:10.3748/wjg.v20.i26.8583 (2014).
- 97 Nakagawa, K. *et al.* The modified Glasgow prognostic score as a predictor of survival after hepatectomy for colorectal liver metastases. *Annals of surgical oncology* **21**, 1711-1718, doi:10.1245/s10434-013-3342-6 (2014).
- 98 Miyazaki, T. *et al.* Inflammation-based scoring is a useful prognostic predictor of pulmonary resection for elderly patients with clinical stage I non-small-cell lung cancer. *Eur J Cardiothorac Surg* **47**, e140-145, doi:10.1093/ejcts/ezu514 (2015).
- 99 Matsuda, S. *et al.* Cumulative prognostic scores based on plasma fibrinogen and serum albumin levels in esophageal cancer patients treated with transthoracic esophagectomy: comparison with the Glasgow prognostic score. *Annals of surgical oncology* **22**, 302-310, doi:10.1245/s10434-014-3857-5 (2015).
- 100 Farhan-Alanie, O. M., McMahon, J. & McMillan, D. C. Systemic inflammatory response and survival in patients undergoing curative resection of oral squamous cell carcinoma. *Br J Oral Maxillofac Surg* **53**, 126-131, doi:10.1016/j.bjoms.2014.10.007 (2015).
- 101 Ferro, M. *et al.* Modified Glasgow Prognostic Score is Associated With Risk of Recurrence in Bladder Cancer Patients After Radical Cystectomy: A Multicenter Experience. *Medicine (Baltimore)* **94**, e1861, doi:10.1097/md.0000000000001861 (2015).
- 102 Ni, X. C. *et al.* Prognostic Value of the Modified Glasgow Prognostic Score in Patients Undergoing Radical Surgery for Hepatocellular Carcinoma. *Medicine (Baltimore)* **94**, e1486, doi:10.1097/md.0000000000001486 (2015).
- 103 Hirahara, N. *et al.* Impact of inflammation-based prognostic score on survival after curative thoracoscopic esophagectomy for esophageal cancer. *Eur J Surg Oncol* **41**, 1308-1315, doi:10.1016/j.ejso.2015.07.008 (2015).
- 104 Shibutani, M. *et al.* The prognostic significance of a postoperative systemic inflammatory response in patients with colorectal cancer. *World J Surg Oncol* **13**, 194, doi:10.1186/s12957-015-0609-3 (2015).
- 105 Shiba, H. *et al.* Glasgow prognostic score predicts outcome after surgical resection of gallbladder cancer. *World J Surg* **39**, 753-758, doi:10.1007/s00268-014-2844-0 (2015).
- 106 Watt, D. G., Martin, J. C., Park, J. H., Horgan, P. G. & McMillan, D. C. Neutrophil count is the most important prognostic component of the differential white cell count in patients

- undergoing elective surgery for colorectal cancer. *American journal of surgery* **210**, 24-30, doi:10.1016/j.amjsurg.2014.12.031 (2015).
- 107 Okamura, Y. *et al.* Preoperative neutrophil to lymphocyte ratio and prognostic nutritional index predict overall survival after hepatectomy for hepatocellular carcinoma. *World J Surg* **39**, 1501-1509, doi:10.1007/s00268-015-2982-z (2015).
- 108 Abe, T. *et al.* Prediction of long-term survival by using the Glasgow Prognostic Score in patients with hepatocellular carcinoma after liver transplantation. *Hepatol Res* **46**, 622-633, doi:10.1111/hepr.12597 (2016).
- 109 Park, J. H. *et al.* Mismatch repair status in patients with primary operable colorectal cancer: associations with the local and systemic tumour environment. *British journal of cancer* **114**, 562-570, doi:10.1038/bjc.2016.17 (2016).
- 110 Fu, Y. P. *et al.* A Novel and Validated Inflammation-Based Score (IBS) Predicts Survival in Patients With Hepatocellular Carcinoma Following Curative Surgical Resection: A STROBE-Compliant Article. *Medicine (Baltimore)* **95**, e2784, doi:10.1097/md.0000000000002784 (2016).
- 111 Fan, H. *et al.* Comparison of the Glasgow Prognostic Score (GPS) and the modified Glasgow Prognostic Score (mGPS) in evaluating the prognosis of patients with operable and inoperable non-small cell lung cancer. *J Cancer Res Clin Oncol* **142**, 1285-1297, doi:10.1007/s00432-015-2113-0 (2016).
- 112 Chan, J. C. *et al.* The Lymphocyte-to-Monocyte Ratio is a Superior Predictor of Overall Survival in Comparison to Established Biomarkers of Resectable Colorectal Cancer. *Annals of surgery*, doi:10.1097/sla.0000000000001743 (2016).
- 113 Walsh, S. M., Casey, S., Kennedy, R., Ravi, N. & Reynolds, J. V. Does the modified Glasgow Prognostic Score (mGPS) have a prognostic role in esophageal cancer? *J Surg Oncol* **113**, 732-737, doi:10.1002/jso.24225 (2016).
- 114 Otowa, Y. *et al.* Changes in modified Glasgow prognostic score after neoadjuvant chemotherapy is a prognostic factor in clinical stage II/III esophageal cancer. *Dis Esophagus* **29**, 146-151, doi:10.1111/dote.12316 (2016).
- 115 Melling, N. *et al.* Glasgow Prognostic Score may be a prognostic index for overall and perioperative survival in gastric cancer without perioperative treatment. *Surgery* **159**, 1548-1556, doi:10.1016/j.surg.2016.01.018 (2016).
- 116 Halazun, K. J. *et al.* Elevated preoperative neutrophil to lymphocyte ratio predicts survival following hepatic resection for colorectal liver metastases. *Eur J Surg Oncol* **34**, 55-60, doi:10.1016/j.ejso.2007.02.014 (2008).
- 117 Gomez, D., Morris-Stiff, G., Toogood, G. J., Lodge, J. P. & Prasad, K. R. Impact of systemic inflammation on outcome following resection for intrahepatic cholangiocarcinoma. *J Surg Oncol* **97**, 513-518, doi:10.1002/jso.21001 (2008).
- 118 Sarraf, K. M. *et al.* Neutrophil/lymphocyte ratio and its association with survival after complete resection in non-small cell lung cancer. *J Thorac Cardiovasc Surg* **137**, 425-428, doi:10.1016/j.jtcvs.2008.05.046 (2009).
- 119 Kishi, Y. *et al.* Blood neutrophil-to-lymphocyte ratio predicts survival in patients with colorectal liver metastases treated with systemic chemotherapy. *Annals of surgical oncology* **16**, 614-622, doi:10.1245/s10434-008-0267-6 (2009).
- 120 Cho, H. *et al.* Pre-treatment neutrophil to lymphocyte ratio is elevated in epithelial ovarian cancer and predicts survival after treatment. *Cancer Immunol Immunother* **58**, 15-23, doi:10.1007/s00262-008-0516-3 (2009).

- 121 Smith, R. A. *et al.* Preoperative platelet-lymphocyte ratio is an independent significant prognostic marker in resected pancreatic ductal adenocarcinoma. *American journal of surgery* **197**, 466-472, doi:10.1016/j.amjsurg.2007.12.057 (2009).
- 122 Halazun, K. J. *et al.* Negative impact of neutrophil-lymphocyte ratio on outcome after liver transplantation for hepatocellular carcinoma. *Annals of surgery* **250**, 141-151, doi:10.1097/SLA.0b013e3181a77e59 (2009).
- 123 Jagdev, S. P. *et al.* Improving the accuracy of pre-operative survival prediction in renal cell carcinoma with C-reactive protein. *British journal of cancer* **103**, 1649-1656, doi:10.1038/sj.bjc.6605973 (2010).
- 124 Shimada, H. *et al.* High preoperative neutrophil-lymphocyte ratio predicts poor survival in patients with gastric cancer. *Gastric Cancer* **13**, 170-176, doi:10.1007/s10120-010-0554-3 (2010).
- 125 Bhatti, I., Peacock, O., Lloyd, G., Larvin, M. & Hall, R. I. Preoperative hematologic markers as independent predictors of prognosis in resected pancreatic ductal adenocarcinoma: neutrophil-lymphocyte versus platelet-lymphocyte ratio. *American journal of surgery* **200**, 197-203, doi:10.1016/j.amjsurg.2009.08.041 (2010).
- 126 Mohri, Y. *et al.* Prognostic significance of host- and tumor-related factors in patients with gastric cancer. *World J Surg* **34**, 285-290, doi:10.1007/s00268-009-0302-1 (2010).
- 127 Liu, H. *et al.* The baseline ratio of neutrophils to lymphocytes is associated with patient prognosis in rectal carcinoma. *J Gastrointest Cancer* **41**, 116-120, doi:10.1007/s12029-009-9125-4 (2010).
- 128 Kao, S. C. *et al.* Low calretinin expression and high neutrophil-to-lymphocyte ratio are poor prognostic factors in patients with malignant mesothelioma undergoing extrapleural pneumonectomy. *J Thorac Oncol* **6**, 1923-1929, doi:10.1097/JTO.0b013e31822a3740 (2011).
- 129 Jung, M. R. *et al.* Elevated preoperative neutrophil to lymphocyte ratio predicts poor survival following resection in late stage gastric cancer. *J Surg Oncol* **104**, 504-510, doi:10.1002/jso.21986 (2011).
- 130 Sharaiha, R. Z. *et al.* Elevated preoperative neutrophil:lymphocyte ratio as a predictor of postoperative disease recurrence in esophageal cancer. *Annals of surgical oncology* **18**, 3362-3369, doi:10.1245/s10434-011-1754-8 (2011).
- 131 Tomita, M., Shimizu, T., Ayabe, T., Yonei, A. & Onitsuka, T. Preoperative neutrophil to lymphocyte ratio as a prognostic predictor after curative resection for non-small cell lung cancer. *Anticancer research* **31**, 2995-2998 (2011).
- 132 Hung, H. Y. *et al.* Effect of preoperative neutrophil-lymphocyte ratio on the surgical outcomes of stage II colon cancer patients who do not receive adjuvant chemotherapy. *Int J Colorectal Dis* **26**, 1059-1065, doi:10.1007/s00384-011-1192-x (2011).
- 133 Neal, C. P. *et al.* Preoperative systemic inflammation and infectious complications after resection of colorectal liver metastases. *Arch Surg* **146**, 471-478, doi:10.1001/archsurg.2011.50 (2011).
- 134 Asher, V., Lee, J., Innamaa, A. & Bali, A. Preoperative platelet lymphocyte ratio as an independent prognostic marker in ovarian cancer. *Clin Transl Oncol* **13**, 499-503, doi:10.1007/s12094-011-0687-9 (2011).
- 135 Wang, G. Y. *et al.* A scoring model based on neutrophil to lymphocyte ratio predicts recurrence of HBV-associated hepatocellular carcinoma after liver transplantation. *PloS one* **6**, e25295, doi:10.1371/journal.pone.0025295 (2011).

- 136 Bertuzzo, V. R. *et al.* Analysis of factors affecting recurrence of hepatocellular carcinoma after liver transplantation with a special focus on inflammation markers. *Transplantation* **91**, 1279-1285, doi:10.1097/TP.0b013e3182187cf0 (2011).
- 137 Idowu, O. K., Ding, Q., Taktak, A. F., Chandrasekar, C. R. & Yin, Q. Clinical implication of pretreatment neutrophil to lymphocyte ratio in soft tissue sarcoma. *Biomarkers* **17**, 539-544, doi:10.3109/1354750x.2012.699554 (2012).
- 138 Ishizuka, M. *et al.* Clinical significance of tumor pathology for postoperative survival of patients undergoing surgery for stage IV colorectal cancer. *Anticancer research* **32**, 3291-3297 (2012).
- 139 Gondo, T. *et al.* Prognostic value of neutrophil-to-lymphocyte ratio and establishment of novel preoperative risk stratification model in bladder cancer patients treated with radical cystectomy. *Urology* **79**, 1085-1091, doi:10.1016/j.urology.2011.11.070 (2012).
- 140 Kwon, H. C. *et al.* Clinical significance of preoperative neutrophil-lymphocyte versus platelet-lymphocyte ratio in patients with operable colorectal cancer. *Biomarkers* **17**, 216-222, doi:10.3109/1354750x.2012.656705 (2012).
- 141 Carruthers, R. *et al.* Systemic inflammatory response is a predictor of outcome in patients undergoing preoperative chemoradiation for locally advanced rectal cancer. *Colorectal Dis* **14**, e701-707, doi:10.1111/j.1463-1318.2012.03147.x (2012).
- 142 Wang, L. *et al.* Esophageal carcinosarcoma: a unique entity with better prognosis. *Annals of surgical oncology* **20**, 997-1004, doi:10.1245/s10434-012-2658-y (2013).
- 143 Choi, E. S., Kim, H. S. & Han, I. Elevated preoperative systemic inflammatory markers predict poor outcome in localized soft tissue sarcoma. *Annals of surgical oncology* **21**, 778-785, doi:10.1245/s10434-013-3418-3 (2014).
- 144 Szkandera, J. *et al.* Elevated preoperative neutrophil/lymphocyte ratio is associated with poor prognosis in soft-tissue sarcoma patients. *British journal of cancer* **108**, 1677-1683, doi:10.1038/bjc.2013.135 (2013).
- 145 Krane, L. S. *et al.* Preoperative neutrophil/lymphocyte ratio predicts overall survival and extravesical disease in patients undergoing radical cystectomy. *Journal of endourology* **27**, 1046-1050, doi:10.1089/end.2012.0606 (2013).
- 146 Pichler, M. *et al.* Validation of the pre-treatment neutrophil-lymphocyte ratio as a prognostic factor in a large European cohort of renal cell carcinoma patients. *British journal of cancer* **108**, 901-907, doi:10.1038/bjc.2013.28 (2013).
- 147 Jankova, L., Dent, O. F., Chan, C., Chapuis, P. & Clarke, S. J. Preoperative neutrophil/lymphocyte ratio predicts overall survival but does not predict recurrence or cancer-specific survival after curative resection of node-positive colorectal cancer. *BMC Cancer* **13**, 442, doi:10.1186/1471-2407-13-442 (2013).
- 148 Fu, S. J. *et al.* Prognostic value of preoperative peripheral neutrophil-to-lymphocyte ratio in patients with HBV-associated hepatocellular carcinoma after radical hepatectomy. *Medical oncology (Northwood, London, England)* **30**, 721, doi:10.1007/s12032-013-0721-6 (2013).
- 149 Shibutani, M. *et al.* A high preoperative neutrophil-to-lymphocyte ratio is associated with poor survival in patients with colorectal cancer. *Anticancer research* **33**, 3291-3294 (2013).
- 150 Forget, P. *et al.* Neutrophil:lymphocyte ratio and intraoperative use of ketorolac or diclofenac are prognostic factors in different cohorts of patients undergoing breast, lung, and kidney cancer surgery. *Annals of surgical oncology* **20 Suppl 3**, S650-660, doi:10.1245/s10434-013-3136-x (2013).



- 151 Absenger, G. *et al.* A derived neutrophil to lymphocyte ratio predicts clinical outcome in stage II and III colon cancer patients. *British journal of cancer* **109**, 395-400, doi:10.1038/bjc.2013.346 (2013).
- 152 Mano, Y. *et al.* Preoperative neutrophil-to-lymphocyte ratio is a predictor of survival after hepatectomy for hepatocellular carcinoma: a retrospective analysis. *Annals of surgery* **258**, 301-305, doi:10.1097/SLA.0b013e318297ad6b (2013).
- 153 Azuma, T. *et al.* Preoperative neutrophil-lymphocyte ratio as an independent prognostic marker for patients with upper urinary tract urothelial carcinoma. *Clinical genitourinary cancer* **11**, 337-341, doi:10.1016/j.clgc.2013.04.003 (2013).
- 154 Dumitrascu, T., Chirita, D., Ionescu, M. & Popescu, I. Resection for hilar cholangiocarcinoma: analysis of prognostic factors and the impact of systemic inflammation on long-term outcome. *J Gastrointest Surg* **17**, 913-924, doi:10.1007/s11605-013-2144-2 (2013).
- 155 Perisanidis, C. *et al.* High neutrophil-to-lymphocyte ratio is an independent marker of poor disease-specific survival in patients with oral cancer. *Medical oncology (Northwood, London, England)* **30**, 334, doi:10.1007/s12032-012-0334-5 (2013).
- 156 Noh, H., Eomm, M. & Han, A. Usefulness of pretreatment neutrophil to lymphocyte ratio in predicting disease-specific survival in breast cancer patients. *J Breast Cancer* **16**, 55-59, doi:10.4048/jbc.2013.16.1.55 (2013).
- 157 Liao, Y., Ni, Y., He, R., Liu, W. & Du, J. Clinical implications of fibroblast activation protein-alpha in non-small cell lung cancer after curative resection: a new predictor for prognosis. *J Cancer Res Clin Oncol* **139**, 1523-1528, doi:10.1007/s00432-013-1471-8 (2013).
- 158 Bambury, R. M. *et al.* The association of pre-treatment neutrophil to lymphocyte ratio with overall survival in patients with glioblastoma multiforme. *J Neurooncol* **114**, 149-154, doi:10.1007/s11060-013-1164-9 (2013).
- 159 Toiyama, Y. *et al.* C-reactive protein as predictor of recurrence in patients with rectal cancer undergoing chemoradiotherapy followed by surgery. *Anticancer research* **33**, 5065-5074 (2013).
- 160 Szkandera, J. *et al.* The lymphocyte/monocyte ratio predicts poor clinical outcome and improves the predictive accuracy in patients with soft tissue sarcomas. *Int J Cancer* **135**, 362-370, doi:10.1002/ijc.28677 (2014).
- 161 Dalpiaz, O. *et al.* Validation of pretreatment neutrophil-lymphocyte ratio as a prognostic factor in a European cohort of patients with upper tract urothelial carcinoma. *BJU international* **114**, 334-339, doi:10.1111/bju.12441 (2014).
- 162 Luo, H. L. *et al.* Subclassification of upper urinary tract urothelial carcinoma by the neutrophil-to-lymphocyte ratio (NLR) improves prediction of oncological outcome. *BJU international* **113**, E144-149, doi:10.1111/bju.12582 (2014).
- 163 Zhang, T. *et al.* Evaluation of preoperative hematologic markers as prognostic factors and establishment of novel risk stratification in resected pN0 non-small-cell lung cancer. *PloS one* **9**, e111494, doi:10.1371/journal.pone.0111494 (2014).
- 164 Ying, H. Q. *et al.* The prognostic value of preoperative NLR, d-NLR, PLR and LMR for predicting clinical outcome in surgical colorectal cancer patients. *Medical oncology (Northwood, London, England)* **31**, 305, doi:10.1007/s12032-014-0305-0 (2014).
- 165 Linton, A. *et al.* Factors associated with survival in a large series of patients with malignant pleural mesothelioma in New South Wales. *British journal of cancer* **111**, 1860-1869, doi:10.1038/bjc.2014.478 (2014).

- 166 Kubo, T. *et al.* Impact of the perioperative neutrophil-to-lymphocyte ratio on the long-term survival following an elective resection of colorectal carcinoma. *International journal of colorectal disease* **29**, 1091-1099, doi:10.1007/s00384-014-1964-1 (2014).
- 167 Viers, B. R. *et al.* Preoperative neutrophil-lymphocyte ratio predicts death among patients with localized clear cell renal carcinoma undergoing nephrectomy. *Urologic oncology* **32**, 1277-1284, doi:10.1016/j.urolonc.2014.05.014 (2014).
- 168 Koh, Y. W., Lee, H. J., Ahn, J. H., Lee, J. W. & Gong, G. Prognostic significance of the ratio of absolute neutrophil to lymphocyte counts for breast cancer patients with ER/PR-positivity and HER2-negativity in neoadjuvant setting. *Tumour biology : the journal of the International Society for Oncodevelopmental Biology and Medicine* **35**, 9823-9830, doi:10.1007/s13277-014-2282-5 (2014).
- 169 Hermanns, T. *et al.* Pre-treatment neutrophil-to-lymphocyte ratio as predictor of adverse outcomes in patients undergoing radical cystectomy for urothelial carcinoma of the bladder. *British journal of cancer* **111**, 444-451, doi:10.1038/bjc.2014.305 (2014).
- 170 Tanaka, N. *et al.* A multi-institutional validation of the prognostic value of the neutrophil-to-lymphocyte ratio for upper tract urothelial carcinoma treated with radical nephroureterectomy. *Annals of surgical oncology* **21**, 4041-4048, doi:10.1245/s10434-014-3830-3 (2014).
- 171 Jiang, N. *et al.* The role of preoperative neutrophil-lymphocyte and platelet-lymphocyte ratio in patients after radical resection for gastric cancer. *Biomarkers : biochemical indicators of exposure, response, and susceptibility to chemicals* **19**, 444-451, doi:10.3109/1354750x.2014.926567 (2014).
- 172 Yuan, D. *et al.* The preoperative neutrophil-lymphocyte ratio predicts recurrence and survival among patients undergoing R0 resections of adenocarcinomas of the esophagogastric junction. *Journal of surgical oncology* **110**, 333-340, doi:10.1002/jso.23651 (2014).
- 173 Ozdemir, Y., Akin, M. L., Sucullu, I., Balta, A. Z. & Yucel, E. Pretreatment neutrophil/lymphocyte ratio as a prognostic aid in colorectal cancer. *Asian Pacific journal of cancer prevention : APJCP* **15**, 2647-2650 (2014).
- 174 Feng, J. F., Huang, Y. & Chen, Q. X. Preoperative platelet lymphocyte ratio (PLR) is superior to neutrophil lymphocyte ratio (NLR) as a predictive factor in patients with esophageal squamous cell carcinoma. *World journal of surgical oncology* **12**, 58, doi:10.1186/1477-7819-12-58 (2014).
- 175 Viers, B. R. *et al.* Pretreatment neutrophil-to-lymphocyte ratio is associated with advanced pathologic tumor stage and increased cancer-specific mortality among patients with urothelial carcinoma of the bladder undergoing radical cystectomy. *European urology* **66**, 1157-1164, doi:10.1016/j.eururo.2014.02.042 (2014).
- 176 McNamara, M. G. *et al.* Neutrophil/lymphocyte ratio as a prognostic factor in biliary tract cancer. *European journal of cancer (Oxford, England : 1990)* **50**, 1581-1589, doi:10.1016/j.ejca.2014.02.015 (2014).
- 177 Malietzis, G. *et al.* A preoperative neutrophil to lymphocyte ratio of 3 predicts disease-free survival after curative elective colorectal cancer surgery. *Annals of surgery* **260**, 287-292, doi:10.1097/sla.0000000000000216 (2014).
- 178 Grivas, N. *et al.* Clinico-pathological prognostic factors of renal cell carcinoma: A 15-year review from a single center in Greece. *Urology annals* **6**, 116-121, doi:10.4103/0974-7796.130552 (2014).

- 179 Shen, L. *et al.* Baseline neutrophil-lymphocyte ratio ( $\geq 2.8$ ) as a prognostic factor for patients with locally advanced rectal cancer undergoing neoadjuvant chemoradiation. *Radiation oncology (London, England)* **9**, 295, doi:10.1186/s13014-014-0295-2 (2014).
- 180 Neofytou, K. *et al.* Elevated platelet to lymphocyte ratio predicts poor prognosis after hepatectomy for liver-only colorectal metastases, and it is superior to neutrophil to lymphocyte ratio as an adverse prognostic factor. *Medical oncology (Northwood, London, England)* **31**, 239, doi:10.1007/s12032-014-0239-6 (2014).
- 181 Song, Y. *et al.* Preoperative neutrophil-to-lymphocyte ratio as prognostic predictor for hypopharyngeal squamous cell carcinoma after radical resections. *J Craniofac Surg* **26**, e137-140, doi:10.1097/scs.0000000000001235 (2015).
- 182 Takahashi, Y. *et al.* Prognostic Significance of Preoperative Neutrophil-Lymphocyte Ratios in Patients with Stage I Non-small Cell Lung Cancer After Complete Resection. *Annals of surgical oncology* **22 Suppl 3**, S1324-1331, doi:10.1245/s10434-015-4735-5 (2015).
- 183 Tu, X. P. *et al.* Preoperative neutrophil-to-lymphocyte ratio is an independent prognostic marker in patients with laryngeal squamous cell carcinoma. *BMC cancer* **15**, 743, doi:10.1186/s12885-015-1727-6 (2015).
- 184 Shin, J. S., Suh, K. W. & Oh, S. Y. Preoperative neutrophil to lymphocyte ratio predicts survival in patients with T1-2N0 colorectal cancer. *Journal of surgical oncology* **112**, 654-657, doi:10.1002/jso.24061 (2015).
- 185 Que, Y. *et al.* Preoperative platelet-lymphocyte ratio is superior to neutrophil-lymphocyte ratio as a prognostic factor for soft-tissue sarcoma. *BMC cancer* **15**, 648, doi:10.1186/s12885-015-1654-6 (2015).
- 186 Hsu, J. T. *et al.* Prognostic Value of the Preoperative Neutrophil to Lymphocyte Ratio in Resectable Gastric Cancer. *Medicine* **94**, e1589, doi:10.1097/md.0000000000001589 (2015).
- 187 Shimizu, K. *et al.* Preoperative neutrophil/lymphocyte ratio and prognostic nutritional index predict survival in patients with non-small cell lung cancer. *World journal of surgical oncology* **13**, 291, doi:10.1186/s12957-015-0710-7 (2015).
- 188 Han, S. *et al.* Pre-treatment neutrophil-to-lymphocyte ratio is associated with neutrophil and T-cell infiltration and predicts clinical outcome in patients with glioblastoma. *BMC cancer* **15**, 617, doi:10.1186/s12885-015-1629-7 (2015).
- 189 Liao, R. *et al.* Preoperative neutrophil-to-lymphocyte ratio predicts recurrence of patients with single-nodule small hepatocellular carcinoma following curative resection: a retrospective report. *World journal of surgical oncology* **13**, 265, doi:10.1186/s12957-015-0670-y (2015).
- 190 Aldemir, M. N. *et al.* Prognostic Value of Baseline Neutrophil-Lymphocyte and Platelet-Lymphocyte Ratios in Local and Advanced Gastric Cancer Patients. *Asian Pacific journal of cancer prevention : APJCP* **16**, 5933-5937 (2015).
- 191 Kadota, K. *et al.* Prognostic Impact of Immune Microenvironment in Lung Squamous Cell Carcinoma: Tumor-Infiltrating CD10+ Neutrophil/CD20+ Lymphocyte Ratio as an Independent Prognostic Factor. *Journal of thoracic oncology : official publication of the International Association for the Study of Lung Cancer* **10**, 1301-1310, doi:10.1097/jto.0000000000000617 (2015).
- 192 Neofytou, K. *et al.* The Preoperative Lymphocyte-to-Monocyte Ratio is Prognostic of Clinical Outcomes for Patients with Liver-Only Colorectal Metastases in the Neoadjuvant Setting. *Annals of surgical oncology* **22**, 4353-4362, doi:10.1245/s10434-015-4481-8 (2015).
- 193 Bagante, F. *et al.* Neutrophil-lymphocyte and platelet-lymphocyte ratio as predictors of disease specific survival after resection of adrenocortical carcinoma. *Journal of surgical oncology* **112**, 164-172, doi:10.1002/jso.23982 (2015).

- 194 Wang, Q. *et al.* The Severity of Liver Fibrosis Influences the Prognostic Value of Inflammation-Based Scores in Hepatitis B-Associated Hepatocellular Carcinoma. *Annals of surgical oncology* **22 Suppl 3**, S1125-1132, doi:10.1245/s10434-015-4598-9 (2015).
- 195 Pine, J. K. *et al.* Systemic neutrophil-to-lymphocyte ratio in colorectal cancer: the relationship to patient survival, tumour biology and local lymphocytic response to tumour. *British journal of cancer* **113**, 204-211, doi:10.1038/bjc.2015.87 (2015).
- 196 Li, J., Lin, J., Luo, Y., Kuang, M. & Liu, Y. Multivariate Analysis of Prognostic Biomarkers in Surgically Treated Endometrial Cancer. *PloS one* **10**, e0130640, doi:10.1371/journal.pone.0130640 (2015).
- 197 Zhang, H. *et al.* Clinical significance of preoperative neutrophil-lymphocyte vs platelet-lymphocyte ratio in primary operable patients with non-small cell lung cancer. *American journal of surgery* **210**, 526-535, doi:10.1016/j.amjsurg.2015.03.022 (2015).
- 198 Zhang, Y., Jiang, C., Li, J., Sun, J. & Qu, X. Prognostic significance of preoperative neutrophil/lymphocyte ratio and platelet/lymphocyte ratio in patients with gallbladder carcinoma. *Clinical & translational oncology : official publication of the Federation of Spanish Oncology Societies and of the National Cancer Institute of Mexico* **17**, 810-818, doi:10.1007/s12094-015-1310-2 (2015).
- 199 Qu, J. L. *et al.* Prognostic Model Based on Systemic Inflammatory Response and Clinicopathological Factors to Predict Outcome of Patients with Node-Negative Gastric Cancer. *PloS one* **10**, e0128540, doi:10.1371/journal.pone.0128540 (2015).
- 200 Zhang, W. W., Liu, K. J., Hu, G. L. & Liang, W. J. Preoperative platelet/lymphocyte ratio is a superior prognostic factor compared to other systemic inflammatory response markers in ovarian cancer patients. *Tumour biology : the journal of the International Society for Oncodevelopmental Biology and Medicine* **36**, 8831-8837, doi:10.1007/s13277-015-3533-9 (2015).
- 201 Yu, L., Lv, C. Y., Yuan, A. H., Chen, W. & Wu, A. W. Significance of the preoperative neutrophil-to-lymphocyte ratio in the prognosis of patients with gastric cancer. *World journal of gastroenterology* **21**, 6280-6286, doi:10.3748/wjg.v21.i20.6280 (2015).
- 202 Duan, H. *et al.* Prognostic role of neutrophil-lymphocyte ratio in operable esophageal squamous cell carcinoma. *World journal of gastroenterology* **21**, 5591-5597, doi:10.3748/wjg.v21.i18.5591 (2015).
- 203 Wen, R. M. *et al.* Preoperative Neutrophil to Lymphocyte Ratio as a Prognostic Factor in Patients with Non-metastatic Renal Cell Carcinoma. *Asian Pacific journal of cancer prevention : APJCP* **16**, 3703-3708 (2015).
- 204 Choi, W. J. *et al.* Preoperative Neutrophil-to-Lymphocyte Ratio is a Better Prognostic Serum Biomarker than Platelet-to-Lymphocyte Ratio in Patients Undergoing Resection for Nonmetastatic Colorectal Cancer. *Annals of surgical oncology* **22 Suppl 3**, S603-613, doi:10.1245/s10434-015-4571-7 (2015).
- 205 Deng, Q. *et al.* Prognostic value of pre-operative inflammatory response biomarkers in gastric cancer patients and the construction of a predictive model. *Journal of translational medicine* **13**, 66, doi:10.1186/s12967-015-0409-0 (2015).
- 206 Spolverato, G. *et al.* Neutrophil-lymphocyte and platelet-lymphocyte ratio in patients after resection for hepato-pancreatico-biliary malignancies. *Journal of surgical oncology* **111**, 868-874, doi:10.1002/jso.23900 (2015).
- 207 Han, L. H. *et al.* Prognostic significance of preoperative lymphocyte-monocyte ratio in patients with resectable esophageal squamous cell carcinoma. *Asian Pacific journal of cancer prevention : APJCP* **16**, 2245-2250 (2015).

- 208 Kim, E. Y., Lee, J. W., Yoo, H. M., Park, C. H. & Song, K. Y. The Platelet-to-Lymphocyte Ratio Versus Neutrophil-to-Lymphocyte Ratio: Which is Better as a Prognostic Factor in Gastric Cancer? *Annals of surgical oncology* **22**, 4363-4370, doi:10.1245/s10434-015-4518-z (2015).
- 209 Chan, A. W. *et al.* Prognostic Nutritional Index (PNI) Predicts Tumor Recurrence of Very Early/Early Stage Hepatocellular Carcinoma After Surgical Resection. *Annals of surgical oncology* **22**, 4138-4148, doi:10.1245/s10434-015-4516-1 (2015).
- 210 Choi, J. E. *et al.* Perioperative neutrophil:lymphocyte ratio and postoperative NSAID use as predictors of survival after lung cancer surgery: a retrospective study. *Cancer medicine* **4**, 825-833, doi:10.1002/cam4.428 (2015).
- 211 Lee, S. K. *et al.* Immediate postoperative inflammation is an important prognostic factor in breast cancer. *Oncology* **88**, 337-344, doi:10.1159/000368985 (2015).
- 212 Chen, Z. Y. *et al.* Cytokine profile and prognostic significance of high neutrophil-lymphocyte ratio in colorectal cancer. *British journal of cancer* **112**, 1088-1097, doi:10.1038/bjc.2015.61 (2015).
- 213 Wuxiao, Z. J. *et al.* A prognostic model to predict survival in stage III colon cancer patients based on histological grade, preoperative carcinoembryonic antigen level and the neutrophil lymphocyte ratio. *Asian Pacific journal of cancer prevention : APJCP* **16**, 747-751 (2015).
- 214 Chen, Q. *et al.* The elevated preoperative neutrophil-to-lymphocyte ratio predicts poor prognosis in intrahepatic cholangiocarcinoma patients undergoing hepatectomy. *Tumour biology : the journal of the International Society for Oncodevelopmental Biology and Medicine* **36**, 5283-5289, doi:10.1007/s13277-015-3188-6 (2015).
- 215 Kim, M. *et al.* Prognostic value of systemic inflammatory responses in patients with upper urinary tract urothelial carcinoma. *World journal of urology* **33**, 1439-1457, doi:10.1007/s00345-015-1484-9 (2015).
- 216 Szkandera, J. *et al.* The derived neutrophil/lymphocyte ratio predicts poor clinical outcome in soft tissue sarcoma patients. *American journal of surgery* **210**, 111-116, doi:10.1016/j.amjsurg.2014.10.021 (2015).
- 217 Ben, Q. *et al.* Validation of the pretreatment neutrophil-lymphocyte ratio as a predictor of overall survival in a cohort of patients with pancreatic ductal adenocarcinoma. *Pancreas* **44**, 471-477, doi:10.1097/mpa.0000000000000271 (2015).
- 218 Graziosi, L. *et al.* Prognostic value of preoperative neutrophils to lymphocytes ratio in patients resected for gastric cancer. *American journal of surgery* **209**, 333-337, doi:10.1016/j.amjsurg.2014.06.014 (2015).
- 219 Takahashi, R. *et al.* Prognostic significance of systemic neutrophil and leukocyte alterations in surgically treated endometrial cancer patients: a monoinstitutional study. *Gynecologic oncology* **137**, 112-118, doi:10.1016/j.ygyno.2015.02.006 (2015).
- 220 Shirai, Y. *et al.* Preoperative platelet to lymphocyte ratio predicts outcome of patients with pancreatic ductal adenocarcinoma after pancreatic resection. *Surgery* **158**, 360-365, doi:10.1016/j.surg.2015.03.043 (2015).
- 221 Chen, Q. *et al.* Negative impact of preoperative platelet-lymphocyte ratio on outcome after hepatic resection for intrahepatic cholangiocarcinoma. *Medicine* **94**, e574, doi:10.1097/md.0000000000000574 (2015).
- 222 Lian, L. *et al.* Application of platelet/lymphocyte and neutrophil/lymphocyte ratios in early diagnosis and prognostic prediction in patients with resectable gastric cancer. *Cancer biomarkers : section A of Disease markers* **15**, 899-907, doi:10.3233/cbm-150534 (2015).

- 223 Xie, X., Luo, K. J., Hu, Y., Wang, J. Y. & Chen, J. Prognostic value of preoperative platelet-lymphocyte and neutrophil-lymphocyte ratio in patients undergoing surgery for esophageal squamous cell cancer. *Dis Esophagus* **29**, 79-85, doi:10.1111/dote.12296 (2016).
- 224 Mohri, Y. *et al.* Impact of Preoperative Neutrophil to Lymphocyte Ratio and Postoperative Infectious Complications on Survival After Curative Gastrectomy for Gastric Cancer: A Single Institutional Cohort Study. *Medicine* **95**, e3125, doi:10.1097/md.0000000000003125 (2016).
- 225 Takahashi, Y. *et al.* Neutrophil-Lymphocyte Ratio as a Prognostic Marker for Lung Adenocarcinoma After Complete Resection. *World journal of surgery* **40**, 365-372, doi:10.1007/s00268-015-3275-2 (2016).
- 226 Cheng, Y. C. *et al.* The Prognostic Significance of Inflammation-Associated Blood Cell Markers in Patients with Upper Tract Urothelial Carcinoma. *Annals of surgical oncology* **23**, 343-351, doi:10.1245/s10434-015-4781-z (2016).
- 227 Turner, N. *et al.* Analysis of local chronic inflammatory cell infiltrate combined with systemic inflammation improves prognostication in stage II colon cancer independent of standard clinicopathologic criteria. *International journal of cancer* **138**, 671-678, doi:10.1002/ijc.29805 (2016).
- 228 Fu, Y., Liu, W., OuYang, D., Yang, A. & Zhang, Q. Preoperative Neutrophil-to-lymphocyte Ratio Predicts Long-term Survival in Patients Undergoing Total Laryngectomy With Advanced Laryngeal Squamous Cell Carcinoma: A Single-center Retrospective Study. *Medicine* **95**, e2689, doi:10.1097/md.0000000000002689 (2016).
- 229 Lu, S. D. *et al.* Preoperative Ratio of Neutrophils to Lymphocytes Predicts Postresection Survival in Selected Patients With Early or Intermediate Stage Hepatocellular Carcinoma. *Medicine* **95**, e2722, doi:10.1097/md.0000000000002722 (2016).
- 230 Chen, P. C. & Feng, J. F. A Novel Inflammation-Based Stage (I Stage) in Patients with Resectable Esophageal Squamous Cell Carcinoma. *Mediators of inflammation* **2016**, 5396747, doi:10.1155/2016/5396747 (2016).
- 231 Wang, S. C. *et al.* Pretreatment Neutrophil to Lymphocyte Ratio Independently Predicts Disease-specific Survival in Resectable Gastroesophageal Junction and Gastric Adenocarcinoma. *Annals of surgery* **263**, 292-297, doi:10.1097/sla.0000000000001189 (2016).
- 232 Hodek, M. *et al.* Neoadjuvant chemoradiotherapy of rectal carcinoma : Baseline hematologic parameters influencing outcomes. *Strahlentherapie und Onkologie : Organ der Deutschen Rontgengesellschaft ... [et al]* **192**, 632-640, doi:10.1007/s00066-016-0988-6 (2016).
- 233 Morizawa, Y. *et al.* Neutrophil-to-lymphocyte ratio as a detection marker of tumor recurrence in patients with muscle-invasive bladder cancer after radical cystectomy. *Urologic oncology* **34**, 257.e211-257, doi:10.1016/j.urolonc.2016.02.012 (2016).
- 234 Kosumi, K. *et al.* Neutrophil/lymphocyte ratio predicts the prognosis in esophageal squamous cell carcinoma patients. *Surgery today* **46**, 405-413, doi:10.1007/s00595-015-1197-0 (2016).
- 235 Kawahara, T. *et al.* Neutrophil-to-lymphocyte ratio is a prognostic marker in bladder cancer patients after radical cystectomy. *BMC cancer* **16**, 185, doi:10.1186/s12885-016-2219-z (2016).
- 236 Kang, M., Jeong, C. W., Kwak, C., Kim, H. H. & Ku, J. H. The Prognostic Significance of the Early Postoperative Neutrophil-to-Lymphocyte Ratio in Patients with Urothelial Carcinoma of the Bladder Undergoing Radical Cystectomy. *Annals of surgical oncology* **23**, 335-342, doi:10.1245/s10434-015-4708-8 (2016).
- 237 Bhindi, B. *et al.* Identification of the best complete blood count-based predictors for bladder cancer outcomes in patients undergoing radical cystectomy. *British journal of cancer* **114**, 207-212, doi:10.1038/bjc.2015.432 (2016).

- 238 Raungkaewmanee, S., Tangjitgamol, S., Manusirivithaya, S., Srijaipracharoen, S. & Thavaramara, T. Platelet to lymphocyte ratio as a prognostic factor for epithelial ovarian cancer. *Journal of gynecologic oncology* **23**, 265-273, doi:10.3802/jgo.2012.23.4.265 (2012).
- 239 Feng, J. F., Huang, Y., Zhao, Q. & Chen, Q. X. Clinical significance of preoperative neutrophil lymphocyte ratio versus platelet lymphocyte ratio in patients with small cell carcinoma of the esophagus. *ScientificWorldJournal* **2013**, 504365, doi:10.1155/2013/504365 (2013).
- 240 Baranyai, Z. *et al.* The comparison of thrombocytosis and platelet-lymphocyte ratio as potential prognostic markers in colorectal cancer. *Thrombosis and haemostasis* **111**, 483-490, doi:10.1160/th13-08-0632 (2014).
- 241 Krenn-Pilko, S. *et al.* The elevated preoperative platelet-to-lymphocyte ratio predicts poor prognosis in breast cancer patients. *British journal of cancer* **110**, 2524-2530, doi:10.1038/bjc.2014.163 (2014).
- 242 Szkandera, J. *et al.* The elevated preoperative platelet to lymphocyte ratio predicts decreased time to recurrence in colon cancer patients. *American journal of surgery* **208**, 210-214, doi:10.1016/j.amjsurg.2013.10.030 (2014).
- 243 Zhang, G. M. *et al.* Preoperative lymphocyte-monocyte and platelet-lymphocyte ratios as predictors of overall survival in patients with bladder cancer undergoing radical cystectomy. *Tumour biology : the journal of the International Society for Oncodevelopmental Biology and Medicine* **36**, 8537-8543, doi:10.1007/s13277-015-3613-x (2015).
- 244 Messenger, M., Neofytou, K., Chaudry, M. A. & Allum, W. H. Prognostic impact of preoperative platelets to lymphocytes ratio (PLR) on survival for oesophageal and junctional carcinoma treated with neoadjuvant chemotherapy: A retrospective monocentric study on 153 patients. *European journal of surgical oncology : the journal of the European Society of Surgical Oncology and the British Association of Surgical Oncology* **41**, 1316-1323, doi:10.1016/j.ejso.2015.06.007 (2015).
- 245 Pang, Q. *et al.* Platelet to lymphocyte ratio as a novel prognostic tool for gallbladder carcinoma. *World journal of gastroenterology* **21**, 6675-6683, doi:10.3748/wjg.v21.i21.6675 (2015).
- 246 Ozawa, T. *et al.* The preoperative platelet to lymphocyte ratio is a prognostic marker in patients with stage II colorectal cancer. *International journal of colorectal disease* **30**, 1165-1171, doi:10.1007/s00384-015-2276-9 (2015).
- 247 Saito, H. *et al.* A new prognostic scoring system using factors available preoperatively to predict survival after operative resection of perihilar cholangiocarcinoma. *Surgery* **159**, 842-851, doi:10.1016/j.surg.2015.10.027 (2016).
- 248 Stotz, M. *et al.* The preoperative lymphocyte to monocyte ratio predicts clinical outcome in patients with stage III colon cancer. *British journal of cancer* **110**, 435-440, doi:10.1038/bjc.2013.785 (2014).
- 249 Hu, P. *et al.* Prognostic significance of systemic inflammation-based lymphocyte- monocyte ratio in patients with lung cancer: based on a large cohort study. *PloS one* **9**, e108062, doi:10.1371/journal.pone.0108062 (2014).
- 250 Zhou, X. *et al.* The preoperative lymphocyte to monocyte ratio predicts clinical outcomes in patients with stage II/III gastric cancer. *Tumour biology : the journal of the International Society for Oncodevelopmental Biology and Medicine* **35**, 11659-11666, doi:10.1007/s13277-014-2504-x (2014).
- 251 Hutterer, G. C. *et al.* Low preoperative lymphocyte-monocyte ratio (LMR) represents a potentially poor prognostic factor in nonmetastatic clear cell renal cell carcinoma. *Urologic oncology* **32**, 1041-1048, doi:10.1016/j.urolonc.2014.04.001 (2014).

- 252 Wen, J. *et al.* Prognostic Significance of Preoperative Circulating Monocyte Count in Patients With Breast Cancer: Based on a Large Cohort Study. *Medicine* **94**, e2266, doi:10.1097/md.0000000000002266 (2015).
- 253 Lin, Z. X. *et al.* Lymphocyte-to-monocyte ratio predicts survival of patients with hepatocellular carcinoma after curative resection. *World journal of gastroenterology* **21**, 10898-10906, doi:10.3748/wjg.v21.i38.10898 (2015).
- 254 Yoshida, T. *et al.* A novel risk stratification model, involving preoperative lymphocyte-monocyte ratio and standard pathological factors, for overall survival in patients with bladder cancer undergoing radical cystectomy. *Japanese journal of clinical oncology* **45**, 1162-1167, doi:10.1093/jjco/hyv146 (2015).
- 255 Yamagishi, T. *et al.* Prognostic significance of the lymphocyte-to-monocyte ratio in patients with malignant pleural mesothelioma. *Lung cancer (Amsterdam, Netherlands)* **90**, 111-117, doi:10.1016/j.lungcan.2015.07.014 (2015).
- 256 Ozawa, T. *et al.* Impact of a lymphocyte to monocyte ratio in stage IV colorectal cancer. *The Journal of surgical research* **199**, 386-392, doi:10.1016/j.jss.2015.06.014 (2015).
- 257 Hutterer, G. C. *et al.* Pretreatment lymphocyte-monocyte ratio as a potential prognostic factor in a cohort of patients with upper tract urothelial carcinoma. *Journal of clinical pathology* **68**, 351-355, doi:10.1136/jclinpath-2014-202658 (2015).
- 258 Huang, Y. & Feng, J. F. Low preoperative lymphocyte to monocyte ratio predicts poor cancer-specific survival in patients with esophageal squamous cell carcinoma. *OncoTargets and therapy* **8**, 137-145, doi:10.2147/ott.s73794 (2015).
- 259 Chen, L., Zhang, F., Sheng, X. G. & Zhang, S. Q. Decreased pretreatment lymphocyte/monocyte ratio is associated with poor prognosis in stage Ib1-IIa cervical cancer patients who undergo radical surgery. *OncoTargets and therapy* **8**, 1355-1362, doi:10.2147/ott.s82174 (2015).
- 260 Peng, W. *et al.* Prognostic value of the platelet to lymphocyte ratio change in liver cancer. *The Journal of surgical research* **194**, 464-470, doi:10.1016/j.jss.2014.12.021 (2015).
- 261 Peng, W. *et al.* Neutrophil to lymphocyte ratio changes predict small hepatocellular carcinoma survival. *The Journal of surgical research* **192**, 402-408, doi:10.1016/j.jss.2014.05.078 (2014).

#### Search Details, Dates and Personnel:

- Keywords per database
  - US National Library of Medicine (MEDLINE): Cancer, GPS, Glasgow Prognostic Score, mGPS, modified Glasgow Prognostic Score, NLR, Neutrophil Lymphocyte Ratio, LMR, Leucocyte Monocyte Ratio, PLR, Platelet Lymphocyte Ratio
  - Excerpta Medica database (EMBASE): Cancer, GPS, Glasgow Prognostic Score, mGPS, modified Glasgow Prognostic Score, NLR, Neutrophil Lymphocyte Ratio, LMR, Leucocyte Monocyte Ratio, PLR, Platelet Lymphocyte Ratio
  - Cochrane Database of Systematic Reviews (CDSR): Cancer, GPS, Glasgow Prognostic Score, mGPS, modified Glasgow Prognostic Score, NLR, Neutrophil Lymphocyte Ratio, LMR, Leucocyte Monocyte Ratio, PLR, Platelet Lymphocyte Ratio
- Search Dates: Until December 2016
- Search Personnel: Mr Ross Dolan and Mr Jason Lim



## PRISMA Checklist:

| Section/topic             | #  | Checklist item                                                                                                                                                                                                                                                                                              | Reported on page # |
|---------------------------|----|-------------------------------------------------------------------------------------------------------------------------------------------------------------------------------------------------------------------------------------------------------------------------------------------------------------|--------------------|
| <b>TITLE</b>              |    |                                                                                                                                                                                                                                                                                                             |                    |
| Title                     | 1  | Identify the report as a systematic review, meta-analysis, or both.                                                                                                                                                                                                                                         | 1                  |
| <b>ABSTRACT</b>           |    |                                                                                                                                                                                                                                                                                                             |                    |
| Structured summary        | 2  | Provide a structured summary including, as applicable: background; objectives; data sources; study eligibility criteria, participants, and interventions; study appraisal and synthesis methods; results; limitations; conclusions and implications of key findings; systematic review registration number. | 2                  |
| <b>INTRODUCTION</b>       |    |                                                                                                                                                                                                                                                                                                             |                    |
| Rationale                 | 3  | Describe the rationale for the review in the context of what is already known.                                                                                                                                                                                                                              | 3-4                |
| Objectives                | 4  | Provide an explicit statement of questions being addressed with reference to participants, interventions, comparisons, outcomes, and study design (PICOS).                                                                                                                                                  | 4                  |
| <b>METHODS</b>            |    |                                                                                                                                                                                                                                                                                                             |                    |
| Protocol and registration | 5  | Indicate if a review protocol exists, if and where it can be accessed (e.g., Web address), and, if available, provide registration information including registration number.                                                                                                                               | NA                 |
| Eligibility criteria      | 6  | Specify study characteristics (e.g., PICOS, length of follow-up) and report characteristics (e.g., years considered, language, publication status) used as criteria for eligibility, giving rationale.                                                                                                      | 4-5                |
| Information sources       | 7  | Describe all information sources (e.g., databases with dates of coverage, contact with study authors to identify additional studies) in the search and date last searched.                                                                                                                                  | 4-5                |
| Search                    | 8  | Present full electronic search strategy for at least one database, including any limits used, such that it could be repeated.                                                                                                                                                                               | 4-5                |
| Study selection           | 9  | State the process for selecting studies (i.e., screening, eligibility, included in systematic review, and, if applicable, included in the meta-analysis).                                                                                                                                                   | 4-5                |
| Data collection process   | 10 | Describe method of data extraction from reports (e.g., piloted forms, independently, in duplicate) and any processes for obtaining and confirming data from investigators.                                                                                                                                  | 4-5                |
| Data items                | 11 | List and define all variables for which data were sought (e.g., PICOS, funding sources) and any assumptions and simplifications made.                                                                                                                                                                       | 4-5                |

|                                    |          |                                                                                                                                                                                                                        |                           |
|------------------------------------|----------|------------------------------------------------------------------------------------------------------------------------------------------------------------------------------------------------------------------------|---------------------------|
| Risk of bias in individual studies | 12       | Describe methods used for assessing risk of bias of individual studies (including specification of whether this was done at the study or outcome level), and how this information is to be used in any data synthesis. | 4-5                       |
| Summary measures                   | 13       | State the principal summary measures (e.g., risk ratio, difference in means).                                                                                                                                          | 4-5                       |
| Synthesis of results               | 14       | Describe the methods of handling data and combining results of studies, if done, including measures of consistency (e.g., $I^2$ ) for each meta-analysis.                                                              | 4-5                       |
| <b>Section/topic</b>               | <b>#</b> | <b>Checklist item</b>                                                                                                                                                                                                  | <b>Reported on page #</b> |
| Risk of bias across studies        | 15       | Specify any assessment of risk of bias that may affect the cumulative evidence (e.g., publication bias, selective reporting within studies).                                                                           | 4-5                       |
| Additional analyses                | 16       | Describe methods of additional analyses (e.g., sensitivity or subgroup analyses, meta-regression), if done, indicating which were pre-specified.                                                                       | 4-5                       |
| <b>RESULTS</b>                     |          |                                                                                                                                                                                                                        |                           |
| Study selection                    | 17       | Give numbers of studies screened, assessed for eligibility, and included in the review, with reasons for exclusions at each stage, ideally with a flow diagram.                                                        | 5-4                       |
| Study characteristics              | 18       | For each study, present characteristics for which data were extracted (e.g., study size, PICOS, follow-up period) and provide the citations.                                                                           | 5-4                       |
| Risk of bias within studies        | 19       | Present data on risk of bias of each study and, if available, any outcome level assessment (see item 12).                                                                                                              | 19<br>Fig 2-28            |
| Results of individual studies      | 20       | For all outcomes considered (benefits or harms), present, for each study: (a) simple summary data for each intervention group (b) effect estimates and confidence intervals, ideally with a forest plot.               | 5-19<br>(Fig 2-28)        |
| Synthesis of results               | 21       | Present results of each meta-analysis done, including confidence intervals and measures of consistency.                                                                                                                | 5-19<br>(Fig 2-28)        |
| Risk of bias across studies        | 22       | Present results of any assessment of risk of bias across studies (see Item 15).                                                                                                                                        | 19<br>Fig 2-28            |
| Additional analysis                | 23       | Give results of additional analyses, if done (e.g., sensitivity or subgroup analyses, meta-regression [see Item 16]).                                                                                                  | 5-19<br>(Fig 2-28)        |
| <b>DISCUSSION</b>                  |          |                                                                                                                                                                                                                        |                           |
| Summary of evidence                | 24       | Summarize the main findings including the strength of evidence for each main outcome; consider their relevance to key groups (e.g., healthcare providers, users, and policy makers).                                   | 20-23                     |

|                |    |                                                                                                                                                               |     |
|----------------|----|---------------------------------------------------------------------------------------------------------------------------------------------------------------|-----|
| Limitations    | 25 | Discuss limitations at study and outcome level (e.g., risk of bias), and at review-level (e.g., incomplete retrieval of identified research, reporting bias). | 22  |
| Conclusions    | 26 | Provide a general interpretation of the results in the context of other evidence, and implications for future research.                                       | 23  |
| <b>FUNDING</b> |    |                                                                                                                                                               |     |
| Funding        | 27 | Describe sources of funding for the systematic review and other support (e.g., supply of data); role of funders for the systematic review.                    | N/A |

From: Moher D, Liberati A, Tetzlaff J, Altman DG, The PRISMA Group (2009). Preferred Reporting Items for Systematic Reviews and Meta-Analyses: The PRISMA Statement. PLoS Med 6(6): e1000097. doi:10
